# Supplementary material for: Structural analysis identifies an escape route from the adverse lipogenic effects of liver X receptor ligands
Source: PubMed Central journal article supplement (PMC6874530; doi:10.1038/s42003-019-0675-0), 2019-11-22
Supplement: 42003_2019_675_MOESM1_ESM.pdf [file 42003_2019_675_MOESM1_ESM.pdf]

**Supplementary Table 1: Differences in deuteration levels (% of maximal deuteration) of LXR $\alpha$  and LXR $\beta$  peptides upon ligand binding.**

*Related to Figure 2*

Deuterium uptake values for all peptides were corrected to back exchange using the fully deuterated controls. Missing peptides are shown in dark grey. HDX-MS measurements were performed in triplicates and the average values are shown. Color scheme is identical to Figure 2.

| Peptide                       | Secondary Structure | $\Delta$ HDX (apo - ligand), % |         |            |         |        |         |        |         |        |         |        |         |        |         |        |         |        |         |            |         |        |         |        |         |         |         |        |         |        |         |        |         |         |       |
|-------------------------------|---------------------|--------------------------------|---------|------------|---------|--------|---------|--------|---------|--------|---------|--------|---------|--------|---------|--------|---------|--------|---------|------------|---------|--------|---------|--------|---------|---------|---------|--------|---------|--------|---------|--------|---------|---------|-------|
|                               |                     | TO-091317                      |         | WAY-254011 |         | F1     |         | AZ876  |         | AZ1    |         | AZ2    |         | AZ3    |         | AZ4    |         | GW3965 |         | BMS-852927 |         | AZ6    |         | AZ7    |         | LXR-923 |         | AZ8    |         | AZ9    |         | AZ5    |         | 24-25EC |       |
|                               |                     | 30 sec                         | 600 sec | 30 sec     | 600 sec | 30 sec | 600 sec | 30 sec | 600 sec | 30 sec | 600 sec | 30 sec | 600 sec | 30 sec | 600 sec | 30 sec | 600 sec | 30 sec | 600 sec | 30 sec     | 600 sec | 30 sec | 600 sec | 30 sec | 600 sec | 30 sec  | 600 sec | 30 sec | 600 sec | 30 sec | 600 sec | 30 sec | 600 sec |         |       |
| <b>LXR<math>\alpha</math></b> |                     |                                |         |            |         |        |         |        |         |        |         |        |         |        |         |        |         |        |         |            |         |        |         |        |         |         |         |        |         |        |         |        |         |         |       |
| 200-210                       | H1                  | 3,7                            | -1,4    | -1,7       | -1,9    | 2,3    | -3,5    | 2,3    | -2,1    | 4,9    | 0,2     | 5,3    | -3,3    | 7,5    | 0,7     | 4,8    | 2,3     | -12,1  | -4,3    | 1,5        | -0,3    | 9,1    | 2,3     | -1,6   | -2,0    | 7,3     | -0,3    | 6,5    | 1,3     | 3,3    | 2,6     | 7,4    | 2,2     | 2,4     | -3,5  |
| 200-213                       | H1                  | 0,0                            | 0,9     | -3,2       | -2,0    | -4,7   | -5,4    | -0,2   | -0,7    | -1,6   | -3,1    | 4,1    | 1,4     | 6,3    | 2,8     | -1,4   | -1,7    | -7,3   | -3,3    | 2,9        | 0,0     | 2,4    | 0,9     | -2,0   | -2,0    | 8,1     | 3,8     | 4,2    | -0,1    | -1,1   | -1,5    | 5,9    | 1,6     | 2,9     | 0,5   |
| 204-213                       | H1                  | -1,6                           | 2,0     | -2,9       | 0,9     | -0,5   | -2,1    | -3,5   | 1,4     | 1,0    | 1,3     | 2,7    | 2,0     | 4,9    | 4,5     | -2,4   | -0,1    | -5,6   | -2,8    | 2,3        | 0,7     | 7,5    | 10,7    | -2,2   | -1,9    | 6,3     | 4,6     | 5,3    | 3,1     | -0,6   | 1,2     | 5,2    | 3,0     | 4,5     | 2,2   |
| 207-213                       | H1                  | 3,8                            | 9,9     | -11,0      | -3,3    | -1,3   | 0,8     | -5,3   | 0,3     | -11,3  | -12,4   | -11,7  | -11,0   | 4,7    | 3,0     | -4,3   | -2,1    | -6,9   | -2,5    | 1,3        | 2,0     | -5,2   | -7,0    | 2,7    | 6,6     | 9,1     | 6,8     | -1,8   | -3,4    | -4,5   | -3,4    | 5,8    | 0,6     | 2,6     | 1,7   |
| 208-213                       | H1                  | 1,1                            | 6,8     | -5,7       | -2,2    | -7,7   | -8,8    | -4,7   | -0,5    | -6,3   | -6,4    | -7,5   | -8,4    | 1,5    | 2,7     | -5,2   | -1,9    | -4,2   | -2,2    | 0,7        | 0,8     | -5,1   | -3,8    | -6,9   | -1,1    | 5,2     | 4,4     | -0,1   | -2,7    | -4,6   | -1,1    | 5,5    | 2,9     | 2,6     | 2,1   |
| 214-219                       | H1                  | -10,4                          | -27,8   | -1,6       | -12,0   | -14,5  | -30,9   | -15,4  | -36,7   | -12,6  | -29,7   | -12,0  | -27,0   | -8,2   | -18,2   | -8,6   | -24,7   | 10,0   | 6,9     | -8,4       | -13,1   | -7,6   | -18,1   | -6,7   | -10,2   | -4,2    | -8,6    | 0,4    | 0,5     | -8,2   | -14,3   | -0,4   | 0,1     | -7,5    | -12,6 |
| 214-233                       | H1                  | -8,8                           | -5,7    | -3,6       | -4,4    | -9,7   | -8,5    | -12,2  | -13,2   | -6,2   | -11,5   | -9,8   | -7,9    | -7,3   | -5,7    | -12,6  | -11,2   | 1,8    | 0,0     | -4,5       | -2,6    | -11,6  | -8,2    | -6,8   | -4,7    | -3,3    | -3,8    | -0,5   | -1,4    | -2,1   | -3,5    | -0,1   | -0,5    | -4,7    | -3,7  |
| 220-233                       | H1                  | -2,5                           | -0,3    | -1,4       | 1,1     | -2,0   | 1,9     | -1,4   | 1,1     | 0,4    | 1,4     | -2,0   | 0,3     | -3,9   | -2,7    | -7,0   | -4,7    | -2,0   | -1,3    | -1,6       | -2,1    | -6,7   | -4,9    | -4,4   | -3,9    | -3,5    | -3,6    | -2,4   | -3,1    | 1,6    | 2,2     | 1,0    | 0,0     | -1,8    | 0,9   |
| 221-233                       | H1                  | -0,5                           | 1,8     | -0,3       | 0,8     | 0,1    | 2,2     | 0,0    | 1,1     | 1,9    | 2,0     | -0,2   | 1,4     | -6,0   | 0,0     | -5,6   | -0,2    | -1,3   | -0,2    | 0,5        | 0,6     | -5,2   | -1,3    | -4,6   | -3,1    | -5,7    | -3,1    | -2,3   | 0,0     | 2,9    | 1,8     | 3,2    | 0,9     | -0,1    | 1,9   |
| 226-233                       | H1                  | 2,8                            | 4,3     | -2,2       | -1,0    | 1,6    | 2,9     | 0,9    | -0,2    | -1,0   | -3,2    | -5,0   | -2,8    | -4,3   | -3,1    | -6,0   | -3,2    | -3,8   | -2,0    | -0,9       | -2,3    | -8,5   | -9,1    | -14,7  | -14,6   | -4,9    | -6,0    | -2,1   | -2,5    | -0,8   | -1,4    | -6,6   | -3,7    | -1,4    | 0,4   |
| 234-240                       | loop H1-H3          | -2,2                           | -0,2    | -8,2       | -4,8    | -5,5   | -4,1    | -4,9   | -1,6    | -3,9   | -3,2    | -2,1   | -2,9    | -3,0   | -2,4    | -2,4   | -2,9    | -3,3   | 0,3     | 0,5        | -0,1    | -3,2   | -1,9    | -4,5   | -0,5    | -1,0    | -1,4    | -2,2   | -1,5    | -2,9   | -2,4    | -0,3   | -1,4    | -0,3    | 0,8   |
| 234-248                       | loop H1-H3          | 4,5                            | 2,9     | -2,9       | -3,4    | -3,1   | 1,8     | -9,9   | 0,1     | -1,1   | 0,9     | -7,4   | -3,0    | -9,2   | -1,8    | -11,7  | -4,7    | -1,9   | -1,8    | 2,3        | 1,3     | -8,7   | -5,6    | -13,4  | -8,4    | -1,4    | -2,1    | -5,2   | -0,5    | 0,6    | -0,7    | -0,4   | -2,4    | -1,2    | -0,2  |
| 234-254                       | loop H1-H3, H3      | 3,4                            | 1,7     | -3,2       | -1,0    | -5,4   | 1,0     | -8,0   | -0,1    | -0,1   | 0,9     | -4,7   | -0,6    | -5,2   | 1,1     | -6,3   | -2,6    | -9,1   | -5,3    | 3,4        | -0,4    | -3,5   | -5,0    | -13,9  | -19,7   | -1,8    | -2,1    | 3,0    | -0,9    | 3,2    | -2,1    | -1,3   | -0,6    | -1,6    | -0,8  |
| 234-257                       | loop H1-H3, H3      | -6,8                           | 2,7     | -7,6       | -2,8    | -6,1   | 0,7     | -15,0  | -0,6    | -2,8   | -0,5    | -9,7   | -0,5    | -8,7   | 2,8     | -12,8  | -4,8    | -8,0   | -2,4    | 0,5        | 2,1     | -10,5  | -4,6    | -9,0   | -7,3    | -4,2    | -2,4    | -1,8   | -3,2    | 0,4    | -0,4    | -0,5   | -0,5    | -1,3    | 0,5   |
| 239-257                       | loop H1-H3, H3      | -6,9                           | 5,5     | -9,5       | -2,2    | -4,2   | 5,9     | -14,0  | -0,9    | -6,3   | -2,0    | -16,2  | -4,1    | -11,1  | -5,0    | -13,4  | -5,5    | -10,3  | -2,9    | 0,9        | 2,9     | -10,7  | -5,7    | -9,0   | -7,5    | -1,2    | -1,3    | -0,3   | -2,5    | -0,8   | 0,6     | -1,8   | -2,1    | -1,7    | 0,2   |
| 241-257                       | loop H1-H3, H3      | 0,5                            | 3,5     | -3,0       | -3,8    | 0,8    | 2,0     | -0,4   | -2,6    | -0,9   | -5,0    | -2,8   | -2,2    | -3,7   | -3,8    | -6,7   | -5,7    | -10,7  | -3,0    | 2,2        | 0,9     | -7,8   | -7,1    | -2,8   | -2,8    | -2,5    | -3,8    | -1,8   | -3,0    | -0,6   | -0,5    | 0,1    | -1,2    | -1,0    | 0,1   |
| 241-259                       | loop H1-H3, H3      | -0,1                           | 2,9     | -8,8       | -6,7    | -0,8   | -5,1    | -3,1   | -4,4    | -1,5   | -4,8    | -1,3   | -2,2    | -3,8   | -3,8    | -14,0  | -8,9    | -0,9   | -1,6    | -0,2       | -0,9    | 0,8    | -2,2    | -2,4   | -5,2    | 3,1     | 1,4     | -1,8   | -0,5    | -0,8   | -0,7    | -0,7   | -3,8    | -3,8    |       |
| 249-257                       | H3                  | -15,6                          | 4,9     | -15,6      | -6,1    | -9,6   | 0,1     | -25,4  | -0,2    | -7,9   | 3,1     | -16,4  | -2,2    | -13,0  | -3,0    | -19,2  | -6,6    | -18,5  | -6,0    | -2,0       | 3,1     | -14,7  | -5,6    | -15,3  | -11,0   | -6,7    | -2,8    | -2,7   | -3,6    | 0,4    | -1,1    | -1,0   | 0,9     | -1,8    | 0,1   |
| 260-265                       | H3                  | -34,5                          | -42,6   | -28,8      | -44,3   | -41,7  | -45,6   | -31,3  | -46,0   | -27,6  | -24,3   | -24,8  | -23,3   | -32,1  | -27,7   | -34,3  | -29,9   | -31,3  | -49,5   | -44,9      | -77,5   | -31,7  | -9,1    | -42,9  | -34,0   | -17,9   | -9,8    | -12,2  | 12,9    | -5,8   | -0,3    | -2,3   | 3,1     | -9,9    | -14,7 |
| 261-267                       | H3                  | -31,5                          | -40,2   | -26,7      | -40,3   | -35,0  | -38,3   | -31,6  | -42,4   | -22,7  | -35,3   | -21,2  | -20,2   | -32,9  | -28,8   | -32,6  | -31,9   | -30,7  | -40,7   | -44,9      | -68,9   | -29,0  | -18,8   | -36,1  | -31,7   | -20,6   | -11,8   | -9,7   | -1,1    | -5,3   | -6,3    | -5,4   | -2,8    | -10,3   | -9,9  |
| 264-269                       | H3                  | -36,0                          | -32,2   | -31,0      | -37,5   | -34,2  | -34,6   | -35,1  | -38,1   | -25,2  | -31,1   | -24,0  | -15,6   | -35,5  | -24,9   | -35,3  | -28,6   | -34,1  | -34,6   | -50,1      | -69,5   | -30,3  | -15,4   | -40,3  | -30,9   | -20,5   | -8,4    | -7,5   | -1,1    | -6,2   | -2,2    | -4,3   | -1,9    | -10,2   | -5,8  |
| 270-275                       | H3                  | -32,2                          | -26,0   | -11,8      | -11,9   | -27,2  | -17,2   | -38,1  | -27,4   | -28,7  | -20,7   | -25,6  | -8,3    | -29,4  | -18,0   | -30,1  | -22,1   | -17,8  | -14,8   | -20,7      | -6,4    | -27,5  | -10,1   | -25,6  | -20,0   | -11,6   | -7,4    | -9,6   | -3,4    | -8,7   | -0,6    | -7,2   | -4,5    | -12,6   | -0,8  |
| 271-278                       | H3                  | -0,5                           | -5,4    | 3,5        | 4,1     | -2,2   | -8,5    | -0,9   | -6,7    | -1,2   | -7,5    | -1,9   | -4,9    | -2,0   | -5,0    | -2,2   | -4,5    | 7,1    | 17,6    | -1,2       | -7,5    | -2,2   | -4,6    | -1,5   | -5,6    | -1,5    | -3,4    | -1,7   | -2,8    | -0,6   | -3,9    | -1,1   | -3,2    | -0,3    | -3,7  |
| 272-278                       | H3-H4               | -0,3                           | -5,0    | 3,7        | 5,0     | -1,8   | -8,0    | -0,2   | -5,1    | -1,6   | -5,5    | -1,7   | -3,5    | -0,8   | -4,7    | -1,8   | -4,4    | 7,4    | 16,9    | -0,8       | -6,1    | -1,7   | -4,5    | -1,7   | -5,2    | -1,4    | -4,1    | -1,1   | -2,7    | -0,7   | -2,0    | -1,2   | -3,1    | -0,6    | -2,2  |
| 273-278                       | H3-H4               | 0,7                            | -5,8    | 5,1        | 6,1     | -3,3   | -12,8   | -0,2   | -11,0   | 1,1    | -12,2   | -1,6   | -7,8    | -2,7   | -9,5    | -2,0   | -10,8   | 14,1   | 30,8    | -1,8       | -11,9   | -3,7   | -9,9    | -0,7   | -10,9   | -2,5    | -5,8    | -2,6   | -6,3    | -0,2   | -8,0    | -2,5   | -9,1    | 0,8     | -4,3  |
| 271-281                       | H3-H4               | 0,7                            | -3,0    | 6,4        | 7,0     | -2,1   | -4,6    | -2,4   | -4,3    | -0,2   | -5,1    | 0,3    | -2,6    | -2,0   | -5,6    | -1,5   | -4,1    | 13,4   | 19,2    | -0,2       | -6,2    | -2,2   | -5,1    | 0,4    | -3,2    | -1,0    | -5,6    | -2,6   | -3,5    | -0,1   | -2,9    | -1,2   | -3,0    | 0,0     | -1,3  |
| 272-281                       | H3-H4               | -0,3                           | -2,7    | 5,9        | 6,1     | -2,6   | -6,1    | -2,2   | -5,4    | -1,8   | -5,5    | -0,8   | -3,0    | -0,1   | -3,8    | -0,3   | -3,4    | 12,1   | 15,8    | 0,4        | -5,1    | -1,3   | -4,9    | 0,1    | -2,8    | 2,7     | -1,9    | -2,0   | -4,1    | 1,4    | -2,4    | 0,3    | -2,9    | -0,2    | -2,2  |
| 279-286                       | H4-H5               | -9,1                           | -10,4   | 1,3        | 2,4     | -1,5   | -0,6    | -0,4   | -3,2    | 0,2    | -3,1    | -0,9   | -2,5    | -2,8   | -3,2    | -3,4   | -3,2    | 2,7    | 7,4     | -0,6       | -2,6    | -5,3   | -5,4    | -4,7   | -2,8    | -2,3    | -3,7    | -3,2   | -3,8    | -0,3   | -1,1    | -0,8   | -2,2    | -0,3    | -0,4  |
| 280-290                       | H4-H5               | -0,9                           | -2,1    | 3,6        | 4,1     | -0,2   | -3,7    | -0,4   | -5,1    | 0,4    | -5,9    | 0,5    | -3,1    | -3,4   | -4,4    | -4,2   | -4,3    | 5,1    | 12,5    | -1,1       | -4,2    | -4,7   | -4,6    | -3,0   | -3,0    | -2,5    | -3,8    | -3,0   | -4,6    | -0,1   | -3,9    | -1,4   | -4,1    | 0,6     | -2,2  |
| 282-289                       | H4-H5               | -1,4                           | -3,4    | 3,1        | 7,6     | -0,1   | -5,0    | -0,9   | -3,5    | 0,0    | -3,4    | 0,0    | -2,7    | -2,5   | -3,2    | -2,5   | -2,9    | 3,2    | 16,1    | -0,7       | -4,9    | -3,6   | -3,6    | -0,9   | -3,0    | -2,4    | -3,6    | -2,1   | -2,4    | -0,5   | -2,0    | -0,6   | -1,9    | 0,2     | -1,6  |
| 282-290                       | H4-H5               | -0,9                           | -3,4    | 3,6        | 7,7     | 0,5    | -6,0    | 0,0    | -3,7    | 0,4    | -4,1    | 1,0    | -2,1    | -3,2   | -4,6    | -3,0   | -3,2    | 4,7    | 18,2    | -1,1       | -6,0    | -3,4   | -3,9    | -1,1   | -2,8    | -2,5    | -3,5    | -2,7   | -3,7    | 0,4    | -1,7    | -0,9   | -2,4    | 0,3     | -1,3  |
| 285-290                       | H5                  | -3,1                           | -5,7    | 2,2        | 6,5     | -0,1   | -1,3    | 0,7    | -3,0    | -0,3   | -3,0    | -0,3   | -2,8    | -0,8   | -3,2    | -2,8   | -4,6    | 2,6    | 20,7    | 0,2        | -3,6    | -1,0   | -4,2    | -3,8   | -1,7    | -1,3    | -2,9    | -0,9   | -3,8    | -0,4   | -3,8    | 1,8    | -0,5    | 0,7     | -1,6  |
| 290-296                       | H5                  | -14,6                          | -34,7   | -5,8       | -25,6   | -17,6  | -22,0   | -13,9  | -34,4   | -12,4  | -31,8   | -9,2   | -21,9   | -24,0  | -30,7   | -24,6  | -31,7   | -2,6   | -19,1   | -14,8      | -11,3   | -23,9  | -25,5   | -21,8  | -31,5   | -17,1   | -14,8   | -13,0  | -7,1    | -5,7   | -9,6    | -9,3   | -6,1    | -5,5    | -11,1 |
| 299-311                       | H5- $\beta$ sheets  | -9,5                           | -17,4   | -1,3       | -12,0   | -14,5  | -24,6   | -10,7  | -14,8   | -10,4  | -18,4   | -10,1  | -10,7   | -14,9  | -18,8   | -17,1  | -26,3   | 3,2    | -8,7    | -13,2      | -27,1   | -16,5  | -21,8   | -13,0  | -17,2   | -4,1    | -5,7    | -10,5  | -7,3    | -6,2   | -4,4    | -7,4   | -5,4    | -6,2    | -5,3  |
| 299-312                       | H5- $\beta$ sheets  | -12,1                          | -15,6   | -3,2       | -9,6    | -18,6  | -25,1   | -12,6  | -12,9   | -10,6  | -16,2   | -9,8   | -7,5    | -16,5  | -17,2   | -18,7  | -22,3   | 2,6    | -7,4    | -16,9      | -29,5   | -16,8  | -18,1   | -15,2  | -17,4   | -5,3    | -4,6    | -10,1  | -5,9    | -4,8   | -3,4    | -6,5   | -4,6    | -5,5    | -5,6  |
| 300-311                       | H5- $\beta$ sheets  | -10,5                          | -18,8   | -2,2       | -13,7   | -15,4  | -25,1   | -11,3  | -15,8   | -11,2  | -19,5   | -11,2  | -11,9   | -14,9  | -17,9   | -16,6  | -25,4   | 1,5    | -11,4   | -14,3      | -28,7   | -17,5  | -21,7   | -14,4  | -19,1   | -3,8    | -4,8    | -9,9   | -7,2    | -6,7   | -5,0    | -9,0   | -9,2    | -7,2    | -6,2  |
| 300-312                       | H5- $\beta$ sheets  | -12,8                          | -17,6   | -2,8       | -13,3   | -17,1  | -24,3   | -14,7  | -16,2   | -12,5  | -18,8   | -11,8  | -9,8    | -18,1  | -19,0   | -19,4  | -25,5   | 1,8    | -10,7   | -18,4      | -31,4   | -12,4  | -20,1   | -16,0  | -18,8   | -5,3    | -4,9    | -6,8   | -4,4    | -5,2   | -4,0    | -4,9   | -2,6    | -6,5    | -4,7  |
| 299-314                       | H5- $\beta$ sheets  | -17,8                          | -17,0   | -7,5       | -14,4   | -20,3  | -24,9   | -16,7  | -15,8   | -15,5  |         |        |         |        |         |        |         |        |         |            |         |        |         |        |         |         |         |        |         |        |         |        |         |         |       |

|         |                |       |       |       |       |       |       |       |       |       |       |       |       |       |       |       |       |       |       |       |       |       |       |       |       |       |       |       |       |       |       |       |      |       |       |
|---------|----------------|-------|-------|-------|-------|-------|-------|-------|-------|-------|-------|-------|-------|-------|-------|-------|-------|-------|-------|-------|-------|-------|-------|-------|-------|-------|-------|-------|-------|-------|-------|-------|------|-------|-------|
| 342-348 | H7             | -18,5 | -40,8 | -5,2  | -27,6 | -21,6 | -35,0 | -17,1 | -38,7 | -16,6 | -39,3 | -14,4 | -31,9 | -29,2 | -36,8 | -28,8 | -37,0 | 8,4   | -15,5 | -20,1 | -40,8 | -29,3 | -33,4 | -21,2 | -34,6 | -24,3 | -19,4 | -20,2 | -9,2  | -13,2 | -24,3 | -14,6 | -7,5 | -8,8  | -18,6 |
| 349-353 | loop H7-H8     | -5,0  | -16,1 | 6,4   | -8,3  | -6,1  | -4,1  | -2,5  | -12,3 | -1,3  | -13,3 | -1,0  | -8,4  | -11,0 | -8,1  | -13,7 | -14,2 | 13,7  | 0,7   | -2,9  | -21,4 | -15,5 | -14,5 | -4,3  | -21,6 | -8,0  | -6,5  | -6,7  | -4,2  | -0,2  | -6,8  | -5,2  | -4,7 | -1,5  | -10,3 |
| 349-355 | loop H7-H8, H8 | -0,6  | -9,3  | 2,3   | -2,7  | -0,4  | -3,3  | -3,5  | -8,3  | -1,2  | -9,7  | 1,4   | -6,1  | -7,0  | -7,0  | -7,1  | -7,6  | 11,9  | 3,6   | -4,6  | -13,3 | -8,1  | -11,1 | -5,5  | -12,2 | -6,5  | -4,9  | -4,7  | -4,6  | -2,0  | -5,0  | -3,4  | -1,9 | -1,2  | -5,2  |
| 349-356 | loop H7-H8, H8 | -2,1  | -8,4  | 2,6   | 1,3   | -1,5  | -10,0 | -7,4  | -14,1 | -3,2  | -9,0  | 0,0   | -4,2  | -2,8  | -2,9  | -5,2  | -6,9  | 8,0   | 7,1   | -3,5  | -10,2 | -4,3  | -6,5  | -4,8  | -9,9  | -3,7  | -4,1  | -1,1  | -1,3  | -3,1  | -5,0  | -1,5  | -2,0 | -1,8  | -6,6  |
| 350-356 | loop H7-H8, H8 | -0,1  | -2,7  |       |       | -1,0  | -6,0  | 0,5   | -3,4  | -1,5  | -6,8  | 1,1   | -3,1  | 0,6   | -1,3  | -3,2  | -4,0  | 5,0   | 12,1  | 0,5   | -5,2  | -1,4  | -4,0  | -0,8  | -4,2  | 2,0   | -2,2  | 0,4   | -2,2  |       |       | -1,7  | -2,4 | 0,4   | -2,3  |
| 352-356 | H8             | 1,1   | -2,9  | 0,7   | 3,4   | -1,3  | -5,1  | -0,9  | -4,4  | 0,8   | -5,0  | 2,0   | -2,6  | 2,9   | -3,2  | 2,3   | -2,0  | 4,6   | 13,7  | 1,1   | -4,7  | 2,1   | -2,9  | -1,4  | -3,4  | 3,3   | -2,3  | 1,1   | -2,3  | -0,7  | -3,3  | 0,1   | -1,4 | 2,4   | -0,9  |
| 357-361 | H8             | -0,4  | -1,7  | -0,5  | 0,3   | 0,9   | -2,3  | 0,3   | -1,0  | -0,1  | -0,9  | 0,0   | -1,2  | 0,0   | 0,0   | 0,4   | 0,2   | 0,5   | 5,9   | -0,2  | -2,5  | 0,3   | 0,2   | 1,2   | -0,7  | 0,3   | 1,2   | 0,5   | 0,4   | -0,2  | -0,6  | 0,7   | 0,0  | -0,1  | -1,0  |
| 360-365 | H8             | -0,4  | -3,8  | 1,5   | 0,4   | -0,5  | -6,0  | 0,0   | -4,0  | 1,0   | -3,9  | 1,1   | -2,8  | -0,8  | -1,6  | -0,8  | -1,3  | 1,9   | 9,3   | -0,8  | -4,6  | -0,8  | -1,7  | -0,6  | -3,5  | -0,7  | -0,9  | -0,4  | -1,3  | 0,8   | -2,5  | -0,2  | -1,4 | -0,2  | -3,1  |
| 362-367 | H8, loop H8-H9 | -3,2  | -5,7  | 2,0   | -1,5  | -0,6  | -1,9  | -1,9  | -3,8  | 3,1   | -1,6  | 2,3   | -3,0  | -4,3  | -5,3  | -4,9  | -7,2  | 9,4   | 14,6  | 2,4   | -5,1  | -3,3  | -5,3  | -7,9  | -7,1  | 2,6   | -3,5  | -3,3  | -5,0  | 1,4   | -3,2  | -3,3  | -5,4 | -1,5  | -1,1  |
| 362-376 | H8, loop H8-H9 | -9,6  | -10,1 | 1,6   | -7,1  | -11,9 | -5,4  | -10,4 | -11,5 | -7,3  | -13,5 | -7,2  | -6,1  | -14,2 | -9,0  | -14,3 | -9,9  | 10,6  | -2,5  | -4,9  | -2,7  | -14,1 | -7,6  | -11,4 | -6,9  | -11,4 | -5,7  | -9,2  | -2,4  | -4,7  | -3,4  | -6,9  | -2,7 | -4,4  | -4,4  |
| 366-376 | loop H8-H9, H9 | -12,4 | -13,3 | -6,2  | -7,7  | -16,4 | -5,0  | -19,2 | -12,7 | -15,2 | -10,3 | -15,3 | -6,2  | -19,5 | -13,9 | -20,8 | -12,5 | 9,1   | -3,1  | -6,5  | 0,2   | -19,3 | -9,8  | -14,4 | -7,1  | -14,9 | -7,0  | -13,1 | -3,9  | -11,2 | -4,8  | -9,2  | -3,6 | -10,5 | -2,2  |
| 366-377 | loop H8-H9, H9 | -12,5 | -13,2 | -2,2  | -6,8  | -8,4  | -1,8  | -19,5 | -12,2 | -13,3 | -9,8  | -14,3 | -6,2  | -18,4 | -11,4 | -17,9 | -10,0 | 10,6  | -3,8  | -6,6  | 0,6   | -18,5 | -9,9  | -14,6 | -8,7  | -14,2 | -7,0  | -12,4 | -2,6  | -7,8  | -4,0  | -9,1  | -3,1 | -4,0  | -3,0  |
| 366-378 | loop H8-H9, H9 | -11,2 | -13,3 | 0,9   | -5,1  | -13,7 | -5,1  | -15,7 | -13,1 | -9,5  | -9,1  | -6,9  | -3,7  | -16,4 | -12,3 | -15,7 | -11,2 | 11,6  | 0,1   | -6,4  | -1,4  | -16,6 | -10,4 | -14,2 | -10,5 | -12,6 | -8,0  | -10,8 | -3,9  | -5,7  | -3,5  | -7,8  | -3,2 | -4,7  | -2,1  |
| 366-389 | loop H8-H9, H9 | -5,0  | -9,8  | -2,7  | -3,5  | -6,6  | -2,7  | -8,3  | -10,6 | -6,7  | -10,1 | -6,2  | -3,6  | -11,7 | -10,1 | -11,5 | -10,2 | 19,7  | 10,1  | -3,6  | -5,6  | -11,3 | -8,1  | -6,1  | -6,3  | -9,8  | -8,4  | -8,2  | -5,8  | -7,3  | -4,6  | -6,1  | -3,8 | -2,5  | -3,1  |
| 377-385 | H9             | 0,7   | -5,8  | 11,0  | 4,6   | 3,4   | -5,4  | -3,0  | -8,0  | -2,1  | -10,4 | -1,3  | -5,6  | -4,4  | -4,2  | -3,8  | -3,3  | 24,2  | 20,3  | -1,2  | -6,5  | -3,2  | -3,2  | -1,0  | -1,8  | -7,2  | -7,1  | -4,3  | -5,7  | -1,6  | -5,3  | -2,7  | -5,6 | -0,2  | -3,8  |
| 377-386 | H9             | -1,7  | -7,4  | 11,9  | 6,2   | -1,8  | -10,0 | -0,6  | -6,1  | 0,0   | -5,8  | -0,8  | -3,1  | -5,2  | -6,8  | -5,1  | -4,7  | 23,1  | 21,4  | -2,1  | -7,5  | -4,9  | -5,7  | -0,7  | -2,3  | -5,0  | -4,7  | -4,7  | -4,8  | -0,2  | -3,4  | -1,8  | -3,0 | -0,1  | -3,5  |
| 377-387 | H9             | -1,7  | -7,8  | 9,8   | 7,2   | -1,1  | -9,2  | -2,3  | -6,8  | -2,7  | -8,3  | -1,5  | -4,7  | -3,9  | -5,4  | -3,0  | -4,2  | 21,8  | 20,0  | -2,7  | -8,0  | -3,9  | -5,4  | -1,2  | -3,5  | -4,4  | -5,4  | -3,9  | -4,8  | -2,1  | -4,5  | -2,7  | -4,1 | -0,4  | -3,3  |
| 377-389 | H9             | -1,4  | -6,3  | 8,3   | 6,6   | -0,9  | -9,1  | -2,0  | -6,0  | -2,0  | -7,0  | -1,7  | -4,7  | -2,9  | -4,4  | -2,4  | -3,8  | 18,3  | 19,5  | -2,1  | -7,8  | -2,9  | -4,1  | -0,8  | -3,6  | -3,2  | -4,2  | -2,9  | -3,7  | -1,6  | -3,8  | -1,9  | -3,1 | -0,4  | -3,0  |
| 378-389 | H9             | -1,2  | -8,1  | 4,3   | 6,7   | 0,9   | 3,3   | -2,8  | -6,8  | 0,2   | -9,5  | -1,7  | -8,7  | -3,1  | -5,6  | -2,0  | -4,4  | 7,9   | 18,9  | -1,5  | -2,2  | -6,3  | -7,6  | 0,0   | 2,4   | -5,7  | -7,8  | -3,6  | -4,5  | -1,4  | -8,3  | -1,2  | -3,5 | 0,1   | -7,5  |
| 379-389 | H9             | -2,0  | -6,2  | 9,5   | 7,9   | -0,4  | -3,4  | -2,0  | -5,7  | -1,4  | -6,0  | -1,0  | -3,9  | -2,0  | -3,0  | -0,9  | -2,3  | 18,4  | 22,7  | -2,0  | -8,8  | -2,5  | -2,6  | -2,1  | -4,7  | -3,1  | -3,7  | -2,1  | -2,4  | -1,0  | -3,1  | -0,8  | -3,8 | -0,1  | -3,6  |
| 382-389 | H9             | -1,6  | -8,0  | 4,9   | 7,5   | -1,5  | -4,5  | -2,5  | -7,8  | -2,5  | -9,7  | -2,1  | -4,3  | -3,6  | -5,1  | -3,7  | -4,5  | 17,7  | 23,2  | -1,8  | -10,6 | -2,7  | -5,9  | -2,6  | -8,8  | -1,5  | -3,7  | -3,0  | -5,2  | -3,2  | -5,3  | -3,5  | -4,9 | 0,1   | -2,7  |
| 385-389 | H9             | -3,4  | 1,3   | 4,2   | 9,9   | -7,3  | -8,9  | -2,2  | -7,1  | -1,5  | -8,3  | -2,8  | -7,1  | -1,8  | -3,6  | 0,1   | -4,9  | 16,4  | 25,6  | -3,1  | -8,0  | -1,5  | -3,7  | -4,2  | -8,0  | -4,3  | -5,3  | 1,2   | -4,2  | -1,4  | -5,2  | 1,1   | -3,5 | -1,0  | -2,4  |
| 390-402 | H9-H10         | 3,9   | 0,5   | -3,9  | -6,2  | 3,1   | 1,2   | -3,6  | -8,0  | -4,1  | -5,9  | -4,1  | -6,7  | -0,3  | -8,5  | -0,1  | -5,2  | 2,6   | 5,6   | -0,6  | -4,9  | -2,9  | -9,0  | -3,6  | -13,5 | 3,2   | -3,0  | 3,6   | -3,2  | -1,9  | -4,8  | 1,6   | -1,3 | -1,2  | -1,7  |
| 390-404 | H9-H10         | -0,7  | -1,3  | -0,8  | -2,2  | -0,7  | -4,1  | -4,2  | -5,1  | -3,1  | -6,1  | -2,8  | -5,2  | -2,2  | -3,7  | -3,1  | -5,4  | 3,4   | 2,1   | -1,2  | -3,1  | -3,6  | -5,6  | -3,1  | -4,0  | 0,1   | -2,5  | -0,4  | -2,5  | -1,9  | -2,4  | -0,3  | -1,6 | -0,2  | -1,7  |
| 392-402 | H9-H10         | -6,2  | -5,9  | -3,3  | -9,9  | 8,2   | -1,1  | -5,2  | -7,6  | -1,0  | -13,9 | -2,8  | -8,6  | -4,1  | -12,6 | -2,4  | -9,5  | -2,8  | -6,9  | -2,8  | -10,4 | -8,1  | -17,0 | -18,3 | -24,6 | -5,1  | -3,9  | -7,7  | -10,9 | 1,4   | -1,5  | -8,1  | -3,8 | -1,4  | -2,5  |
| 392-404 | H9-H10         | -1,9  | -1,4  | -1,5  | -3,6  | -3,1  | -4,2  | -3,6  | -5,8  | -3,6  | -5,4  | -3,6  | -5,1  | -2,6  | -2,8  | -4,5  | -5,2  | 2,9   | -1,2  | -0,9  | -2,1  | -5,4  | -6,0  | -4,4  | -4,6  | 0,3   | -0,2  | -0,6  | -0,8  | -1,7  | -1,1  | 0,6   | -0,6 | -0,9  | -1,5  |
| 393-404 | H9-H10         | 1,2   | 2,4   | -4,4  | 1,1   | -2,4  | -6,9  | -10,1 | -4,5  | -9,3  | 0,2   | -8,5  | -3,5  | -4,5  | -4,9  | -8,8  | -9,0  | 1,4   | 0,9   | 0,6   | -1,0  | -8,0  | -9,0  | -3,0  | -2,8  | -2,7  | -3,3  | -2,5  | -3,3  | -6,3  | 0,1   | 1,0   | -1,9 | -1,1  | 1,0   |
| 390-408 | H9-H10         | -3,1  | 0,0   | 7,5   | -0,8  | -2,5  | -3,1  | -2,6  | -9,3  | -0,9  | -10,3 | -2,5  | -8,6  | -3,8  | -9,0  | -6,5  | -10,2 | 10,2  | 7,0   | -4,8  | -4,8  | -7,1  | -7,4  | -9,2  | -10,2 | -2,7  | -5,3  | -4,8  | -3,1  | 4,0   | -9,6  | 0,7   | -0,8 | -1,2  | -5,3  |
| 392-407 | H9-H10         | -2,0  | -6,2  | 2,8   | -2,1  | -3,2  | -9,0  | -3,3  | -8,8  | -2,6  | -9,8  | -3,0  | -4,8  | -2,2  | -6,5  | -4,6  | -9,4  | 7,2   | 6,5   | -1,6  | -2,1  | -2,4  | -5,2  | -4,2  | -6,5  | -1,3  | -5,1  | 1,9   | -1,7  | -0,3  | -4,5  | -0,2  | -1,9 | -3,0  | -3,2  |
| 392-409 | H9-H10         | -1,9  | -5,3  | -5,6  | -2,4  | -0,9  | -6,6  | -4,2  | -9,6  | -8,4  | -9,6  | -5,0  | -6,4  | -1,9  | -11,3 | -1,6  | -10,1 | 4,4   | 2,3   | 1,8   | -2,3  | -4,2  | -9,9  | -4,1  | -7,3  | -1,7  | -10,4 | -0,5  | -5,1  | 0,8   | -5,9  | -1,0  | -4,3 | -3,6  | -5,3  |
| 408-413 | H10/11         | 0,7   | 1,2   | -3,7  | -3,7  | -1,0  | -3,7  | -1,6  | -4,8  | -0,8  | -7,5  | 0,6   | 0,4   | -2,1  | -9,7  | -0,6  | -3,0  | -4,9  | -2,0  | 1,0   | 0,1   | -0,5  | -3,6  | -2,8  | -5,3  | -5,4  | -11,6 | -1,9  | -6,7  | -2,2  | -7,4  | -0,8  | -5,2 | -0,6  | -3,0  |
| 410-414 | H10/11         | 0,1   | -1,7  | -2,1  | -5,3  | -2,8  | -8,2  | -1,4  | -6,0  | -2,0  | -9,0  | -0,3  | -2,9  | -3,7  | -12,7 | -1,6  | -6,5  | -2,9  | -1,3  | 0,9   | 6,3   | -1,3  | -7,5  | -3,4  | -9,5  | -7,7  | -12,7 | -3,2  | -7,2  | -2,1  | -6,9  | -1,7  | -5,4 | -2,2  | -4,9  |
| 412-420 | H10/11         | -16,9 | -2,5  | -10,0 | -5,5  | -2,9  | -3,8  | -15,5 | -4,1  | -14,3 | -10,1 | -14,1 | -3,0  | -20,8 | -10,4 | -15,5 | -4,2  | -0,2  | -0,8  | 6,3   | 0,6   | -14,2 | -3,4  | -9,4  | -4,3  | -23,0 | -11,3 | -9,8  | -6,3  | -8,7  | -4,2  | -6,4  | -4,4 | 2,9   | -1,4  |
| 415-420 | H10/11         | -31,8 | -2,8  | -19,1 | -3,5  | -3,1  | 3,0   | -27,4 | -0,6  | -24,7 | -5,5  | -24,4 | 0,5   | -34,8 | -6,9  | -25,3 | -1,0  | -6,5  | -4,0  | 8,7   | 1,7   | -25,1 | 0,4   | -15,7 | -4,5  | -32,9 | -10,7 | -15,1 | -3,8  | -11,9 | 0,5   | -8,9  | -5,0 | 6,8   | -1,3  |
| 412-424 | H10/11         | -30,6 | -3,6  | -12,7 | -6,7  | -9,6  | -7,0  | -20,9 | -5,1  | -11,9 | -8,9  | -16,1 | -1,5  | -31,6 | -10,0 | -24,8 | -4,8  | -6,4  | -4,2  | -0,7  | -1,1  | -21,4 | -7,4  | -13,6 | -2,1  | -29,2 | -13,7 | -14,4 | -6,0  | -6,4  | -5,1  | -7,3  | -8,5 | 4,7   | -4,2  |
| 412-426 | H10/11         | -30,7 | -4,6  | -16,6 | -4,0  | -5,7  | -3,8  | -30,0 | -7,1  | -22,7 | -9,7  | -23,3 | -0,8  | -32,9 | -9,9  | -27,3 | -6,0  | -5,6  | -2,3  | 3,5   | 0,6   | -22,9 | -4,3  | -9,2  | -1,4  | -27,0 | -9,9  | -12,6 | -6,6  | -9,2  | -1,1  | -5,9  | -2,9 | -0,5  | -0,4  |
| 412-427 | H10/11         | -33,3 | -6,2  | -17,7 | -5,3  | -6,0  | -3,8  | -31,7 | -8,6  | -23,4 | -10,8 | -22,5 | -0,7  | -33,9 | -9,3  | -28,5 | -6,0  | -6,3  | -3,3  | 3,0   | 0,7   | -23,4 | -4,0  | -10,3 | -1,8  | -27,6 | -10,0 | -12,0 | -5,8  | -8,8  | -2,1  | -5,9  | -2,9 | -0,8  | -0,7  |
| 414-426 | H10/11         | -35,0 | -4,1  | -20,6 | -3,2  | -5,7  | -1,6  | -34,9 | -6,5  | -27,0 | -7,1  | -26,4 | 0,0   | -34,8 | -4,6  | -28,8 | -2,8  | -8,8  | -3,6  | 3,6   | -0,9  | -24,6 | -1,2  | -10,8 | 0,1   | -29,4 | -7,6  | -12,4 | -4,2  | -10,7 | 0,2   | -5,1  | -0,5 | -2,1  | -0,1  |
| 414-427 | H10/11         | -37,6 | -4,2  | -23,7 | -3,9  | -5,4  | -3,9  | -40,9 | -8,7  | -30,0 | -7,4  | -29,6 | -0,8  | -37,1 | -5,1  | -31,8 | -4,1  | -11,2 | -6,0  | 2,9   | -0,4  | -26,7 | -2,0  | -11,5 | -0,8  | -30,3 | -7,8  | -11,8 | -3,7  | -11,9 | -0,1  | -5,9  | -0,9 | -3,5  | -0,5  |
| 415-426 | H10/11         | -40,2 | -5,0  | -19,6 | -2,5  | -7,0  | -1,0  | -36,1 | -7,5  | -28,8 | -5,9  | -26,7 | 0,7   | -40,3 | -5,6  | -34,2 | -3,7  | -9,6  | -4,1  | 2,6   | -1,4  | -28,4 | -1,9  | -12,1 | -0,1  | -31,0 | -8,1  | -12,3 | -3,4  | -9,6  | 0,8   | -6,6  | -1,0 | -2,8  | -1,0  |
| 415-427 | H10/11         | -43,8 | -5,7  | -21,2 | -3,5  | -7,3  | -1,6  | -39,9 | -7,4  | -28,3 | -5,8  | -29,8 | 0,0   | -40,6 | -5,9  | -34,9 | -4,2  | -9,2  | -3,6  |       |       |       |       |       |       |       |       |       |       |       |       |       |      |       |       |

|         |                |       |       |       |       |       |       |       |       |       |       |       |       |       |       |       |       |       |       |       |       |       |       |       |       |       |       |       |       |       |       |       |       |       |       |
|---------|----------------|-------|-------|-------|-------|-------|-------|-------|-------|-------|-------|-------|-------|-------|-------|-------|-------|-------|-------|-------|-------|-------|-------|-------|-------|-------|-------|-------|-------|-------|-------|-------|-------|-------|-------|
| 274-279 | H3             | -15.4 | -53.6 | -18.7 | -45.8 | -33.2 | -73.4 | -20.6 | -45.6 | -19.1 | -79.3 | -23.1 | -62.0 | -15.4 | -54.9 | -40.4 | -84.4 | -20.6 | -45.0 | -24.6 | -63.7 | -19.2 | -31.4 | -19.2 | -32.2 | -21.2 | -53.4 | -15.9 | -46.7 | -18.0 | -61.3 | -17.9 | -65.7 | -12.1 | -45.7 |
| 275-279 | H3             | -23.8 | -54.7 | -29.2 | -50.0 | -34.5 | -65.3 | -27.4 | -50.7 | -25.4 | -72.6 | -31.3 | -72.5 | -23.0 | -57.8 | -44.7 | -46.4 | -24.1 | -45.7 | -30.6 | -73.2 | -29.7 | -35.1 | -30.0 | -36.5 | -29.5 | -66.8 | -20.8 | -36.4 | -25.8 | -50.9 | -23.1 | -55.8 | -16.3 | -33.2 |
| 274-281 | H3             | -17.7 | -49.9 | -15.4 | -47.2 | -35.0 | -64.9 | -16.8 | -48.9 | -17.8 | -66.1 | -18.8 | -67.1 | -17.8 | -51.3 | -41.2 | -56.2 | -14.5 | -41.2 | -18.7 | -66.0 | -15.6 | -33.5 | -15.6 | -34.6 | -16.5 | -55.0 | -11.7 | -33.8 | -15.2 | -50.9 | -15.2 | -54.2 | -9.5  | -39.3 |
| 275-281 | H3             | -16.5 | -50.8 | -19.8 | -48.7 | -34.0 | -63.9 | -22.1 | -49.2 | -23.3 | -68.5 | -23.1 | -63.8 | -16.3 | -50.4 | -41.0 | -48.2 | -19.9 | -42.2 | -23.1 | -66.0 | -19.7 | -31.5 | -19.1 | -33.0 | -22.1 | -53.8 | -18.3 | -32.9 | -21.5 | -49.6 | -21.6 | -54.7 | -14.9 | -31.7 |
| 279-284 | H3             | -1.6  | -7.3  | 4.1   | 4.4   | -0.9  | -18.8 | 1.6   | -11.6 | -1.9  | -13.2 | 0.3   | -16.1 | -0.8  | -7.5  | -8.1  | -13.6 | 3.1   | 7.0   | -0.7  | -13.8 | 0.6   | -8.5  | -0.3  | -8.4  | -1.1  | -13.1 | -3.3  | -8.3  | -3.7  | -11.3 | -1.0  | -11.6 | -0.5  | -9.2  |
| 280-284 | H3             | -0.8  | -2.1  | 4.8   | 6.2   | 0.5   | -7.9  | 3.7   | -2.4  | -0.6  | -3.9  | 3.4   | -5.5  | 2.9   | -1.2  | -0.6  | -5.7  | 6.1   | 6.5   | 1.8   | -6.1  | 8.3   | 1.3   | 11.4  | 6.3   | 1.6   | -5.6  | 0.4   | -3.8  | 0.7   | -3.3  | 0.6   | -3.0  | 1.9   | -2.0  |
| 280-285 | H3             | 0.5   | -2.1  | 1.5   | 6.4   | 0.3   | -5.8  | -0.6  | -3.0  | 0.0   | -2.4  | 0.7   | -3.3  | 1.0   | -1.0  | 0.8   | -7.2  | 3.1   | 10.7  | -0.4  | -4.2  | -0.7  | -3.3  | -0.4  | -2.1  | 0.4   | -1.9  | -1.4  | -2.6  | -0.7  | -1.7  | -0.3  | -2.2  | -0.5  | -1.7  |
| 281-285 | H3             | -0.5  | -0.3  | 3.2   | 13.5  | 2.4   | -2.8  | -0.2  | -2.9  | 0.2   | -2.3  | -1.7  | -3.4  | 0.6   | 0.8   | -0.5  | -8.2  | 3.6   | 17.0  | -1.0  | -4.8  | -1.2  | -3.6  | -0.7  | -3.8  | -1.3  | -4.0  | 0.4   | -1.7  | 0.2   | -1.1  | 1.0   | -1.5  | 0.3   | -1.2  |
| 285-292 | H3, loop H3-H4 | -0.6  | -1.6  | 4.1   | 13.4  | 0.3   | -1.8  | -0.3  | -1.0  | 1.5   | -0.6  | -1.5  | -3.2  | -2.2  | -3.1  | -0.5  | -2.3  | 5.3   | 23.9  | -1.8  | -2.9  | -1.3  | -2.4  | -2.2  | -2.9  | -2.0  | -3.2  | 0.7   | -0.6  | 0.0   | -1.0  | 1.6   | 0.0   | 0.9   | -0.7  |
| 285-293 | H3, loop H3-H4 | -0.4  | -0.6  | 8.2   | 13.2  | 1.7   | 0.1   | 1.1   | 3.3   | -2.4  | -1.8  | -4.1  | 0.3   | 0.4   | -4.1  | -1.8  | 0.6   | 10.5  | 21.4  | -6.1  | -4.2  | -5.7  | 1.4   | -5.0  | -1.7  | -4.6  | 1.2   | -2.8  | -2.6  | -3.1  | -7.2  | -3.6  | -6.7  | -2.8  | -3.0  |
| 286-292 | H3, loop H3-H4 | 0.7   | 0.0   | 4.4   | 12.9  | 1.5   | -1.2  | -0.4  | -1.7  | 2.1   | 0.9   | -1.1  | -3.4  | -0.4  | -1.1  | 0.0   | -1.4  | 5.6   | 22.7  | -1.5  | -2.7  | -1.2  | -2.5  | -1.1  | -2.2  | -0.6  | -1.7  | 1.5   | -0.2  | 2.2   | 0.3   | 1.4   | -0.2  | 2.3   | 1.0   |
| 285-295 | H3, loop H3-H4 | -0.9  | -1.1  | 8.7   | 14.1  | 2.1   | -0.9  | 0.2   | -0.2  | -0.8  | -1.2  | 0.1   | -1.6  | -0.1  | -1.7  | -1.6  | -0.6  | 11.6  | 20.7  | -0.5  | -0.7  | 2.1   | -0.1  | 0.7   | -0.6  | -1.2  | -0.4  | -1.3  | -0.8  | -1.4  | -1.7  | -1.1  | -1.7  | -1.7  | -1.2  |
| 286-295 | H3, loop H3-H4 | 0.1   | -0.6  | 6.9   | 11.4  | 2.0   | -1.2  | -0.1  | 0.1   | -0.8  | -1.7  | 0.3   | -0.8  | 0.6   | -1.6  | -1.4  | -1.0  | 8.7   | 17.0  | 0.3   | -0.5  | 2.5   | 0.2   | 0.7   | -0.5  | -0.6  | -0.1  | -2.0  | -1.8  | -1.6  | -2.6  | -1.7  | -2.4  | -1.6  | -1.4  |
| 293-300 | H4-H5          | 1.2   | 0.1   | 4.3   | 7.0   | 2.0   | 0.1   | 1.0   | 1.8   | -0.6  | 1.5   | 1.5   | 2.7   | 1.0   | -1.6  | -1.2  | 1.1   | 3.3   | 8.2   | 0.6   | 1.4   | 1.9   | 2.6   | 1.3   | 2.1   | 0.5   | 2.6   | -1.6  | 0.3   | -1.6  | 0.7   | 0.1   | 1.3   | -1.4  | 1.4   |
| 294-299 | H4-H5          | 1.5   | 0.7   | 6.5   | 5.7   | 0.6   | 0.1   | 3.5   | 0.2   | -1.7  | -2.4  | 3.4   | 2.8   | 2.1   | 0.3   | -2.8  | -1.9  | 5.6   | 7.2   | 2.8   | 0.0   | 2.5   | 8.1   | 0.6   | 5.8   | 2.1   | 0.5   | -4.8  | 3.4   | -2.5  | 3.6   | 4.1   | 5.1   | -0.7  | -1.1  |
| 294-304 | H4-H5          | 2.5   | 1.0   | 6.5   | 13.9  | 2.3   | 0.6   | 0.8   | 1.1   | 0.4   | 0.9   | 2.4   | 3.8   | 2.6   | -0.4  | -1.2  | -0.1  | 5.8   | 17.7  | 1.2   | 1.5   | 2.0   | 2.9   | 1.8   | 2.6   | 1.4   | 2.4   | -3.0  | -0.2  | -1.8  | 0.7   | -1.3  | -0.9  | -1.3  | 1.2   |
| 296-303 | H5             | 0.9   | 0.6   | 6.1   | 13.2  | 2.0   | 0.3   | 0.4   | -0.6  | 0.9   | 0.5   | 2.2   | 2.1   | 1.1   | 0.9   | -1.0  | -1.5  | 6.1   | 19.2  | 0.8   | 0.1   | 1.4   | 1.0   | 1.4   | 0.5   | 0.6   | 0.9   | -0.6  | -0.1  | 0.0   | -0.1  | 0.7   | -0.8  | 0.2   | 1.1   |
| 296-304 | H5             | 0.0   | 0.1   | 5.4   | 16.2  | 2.3   | 1.5   | 1.6   | 0.5   | 0.6   | 0.7   | 3.2   | -5.4  | 0.6   | 0.1   | -0.6  | -1.0  | 6.2   | 22.1  | 2.4   | 2.4   | 3.1   | 2.5   | 3.2   | 2.9   | 2.7   | 2.9   | 0.1   | 0.8   | -0.2  | 0.4   | 0.8   | -0.1  | 0.5   | 0.5   |
| 304-308 | H5             | -13.9 | -32.2 | -12.5 | -45.0 | -26.0 | -35.2 | -20.5 | -50.0 | -22.1 | -67.8 | -20.1 | -56.6 | -15.4 | -45.9 | -37.8 | -41.3 | -10.4 | -33.1 | -12.7 | -10.6 | -22.1 | -45.2 | -18.7 | -39.5 | -20.3 | -39.1 | -17.5 | -32.7 | -20.2 | -44.8 | -21.7 | -60.5 | -13.9 | -34.4 |
| 304-310 | H5             | -18.4 | -26.3 | -16.9 | -36.3 | -32.7 | -22.8 | -23.7 | -40.8 | -26.5 | -57.6 | -25.2 | -44.9 | -19.6 | -35.8 | -36.3 | -31.0 | -13.2 | -21.8 | -8.3  | -6.7  | -22.5 | -31.8 | -22.3 | -31.7 | -22.4 | -30.6 | -18.9 | -23.7 | -21.3 | -33.7 | -23.8 | -48.8 | -17.6 | -26.5 |
| 305-310 | H5             | -17.9 | -26.8 | -15.5 | -35.6 | -30.7 | -29.4 | -21.9 | -40.7 | -23.7 | -53.2 | -22.6 | -43.3 | -19.0 | -35.4 | -27.6 | -30.3 | -12.3 | -18.0 | -5.8  | -7.1  | -21.0 | -30.4 | -20.9 | -32.1 | -20.6 | -32.8 | -17.0 | -21.6 | -19.4 | -32.1 | -21.8 | -45.1 | -17.1 | -26.8 |
| 313-325 | H5, βsheets    | -11.6 | -13.0 | -3.0  | -10.8 | -16.5 | -21.8 | -9.0  | -17.3 | -16.1 | -27.8 | -14.3 | -25.7 | -16.1 | -24.7 | -16.8 | -19.3 | -1.1  | -2.0  | -16.5 | -28.2 | -12.2 | -9.9  | -11.7 | -10.6 | -6.9  | -2.9  | -8.4  | -7.6  | -11.4 | -9.3  | -10.5 | -15.6 | -8.6  | -13.4 |
| 313-326 | H5, βsheets    | -15.8 | -13.0 | -9.5  | -15.7 | -19.9 | -19.2 | -14.8 | -15.9 | -20.9 | -31.1 | -20.5 | -29.7 | -19.6 | -27.1 | -17.8 | -20.0 | -6.4  | -6.0  | -21.2 | -31.3 | -16.1 | -12.2 | -15.0 | -12.0 | -11.6 | -4.9  | -10.7 | -9.1  | -15.6 | -10.8 | -16.6 | -16.9 | -9.5  | -11.6 |
| 314-326 | H5, βsheets    | -16.9 | -13.9 | -11.1 | -18.4 | -20.1 | -18.4 | -15.1 | -17.9 | -22.5 | -32.1 | -20.0 | -28.7 | -21.6 | -27.7 | -19.4 | -19.7 | -7.6  | -8.7  | -20.0 | -31.3 | -16.5 | -10.9 | -14.5 | -10.6 | -10.4 | -5.2  | -11.4 | -7.5  | -16.1 | -8.9  | -16.1 | -15.8 | -10.0 | -11.1 |
| 330-340 | βsheets, H6    | -20.8 | -14.1 | -29.7 | -31.1 | -28.6 | -12.5 | -15.8 | -7.9  | -39.7 | -37.7 | -35.7 | -32.9 | -29.9 | -23.7 | -33.7 | -17.5 | -24.4 | -24.4 | -38.3 | -38.4 | -20.8 | 3.7   | -17.5 | 3.9   | -29.7 | -11.4 | -14.2 | 2.4   | -29.0 | -2.3  | -29.5 | -8.7  | -10.6 | 1.6   |
| 333-339 | βsheets, H6    | -30.3 | -26.3 | -30.1 | -35.1 | -29.4 | -15.3 | -27.3 | -11.5 | -33.4 | -37.6 | -35.2 | -37.6 | -30.0 | -30.7 | -20.8 | -6.9  | -24.1 | -28.3 | -34.5 | -44.4 | -25.3 | -0.7  | -23.4 | 0.8   | -31.1 | -17.5 | -17.2 | -2.6  | -26.7 | -8.1  | -27.2 | -10.3 | -11.4 | -3.2  |
| 333-340 | βsheets, H6    | -29.9 | -23.1 | -27.6 | -34.8 | -29.9 | -15.9 | -25.4 | -12.3 | -35.2 | -38.3 | -32.0 | -37.9 | -30.8 | -29.1 | -32.4 | -20.1 | -21.2 | -28.7 | -36.9 | -45.0 | -20.9 | -0.3  | -17.1 | 0.0   | -29.5 | -15.0 | -13.9 | 2.0   | -25.4 | -3.6  | -27.2 | -8.1  | -10.7 | 2.2   |
| 335-340 | βsheets, H6    | -29.7 | -23.8 | -29.0 | -35.2 | -29.5 | -14.5 | -25.3 | -10.9 | -37.1 | -43.0 | -31.7 | -37.5 | -29.6 | -29.7 | -23.3 | -19.8 | -24.8 | -28.0 | -36.5 | -46.2 | -22.8 | 0.9   | -19.9 | 3.3   | -29.2 | -16.4 | -21.7 | -5.6  | -32.7 | -7.9  | -28.6 | -10.5 | -13.5 | -0.8  |
| 333-345 | βsheets, H6    | -43.5 | -25.6 | -29.9 | -29.4 | -44.1 | -14.1 | -37.2 | -13.2 | -48.5 | -47.6 | -44.6 | -40.7 | -44.2 | -32.7 | -42.8 | -24.1 | -25.4 | -22.2 | -26.7 | -18.0 | -30.1 | 0.8   | -23.8 | 2.5   | -24.6 | -8.2  | -22.7 | 1.0   | -33.7 | -4.3  | -37.2 | -9.1  | -17.6 | -2.6  |
| 333-346 | βsheets, H6    | -46.7 | -25.8 | -39.6 | -28.1 | -48.4 | -11.9 | -42.4 | -10.4 | -54.4 | -51.8 | -45.7 | -36.2 | -47.5 | -34.0 | -50.4 | -27.7 | -35.3 | -16.6 | -26.8 | -19.8 | -34.4 | 8.3   | -27.4 | 8.9   | -34.4 | -11.0 | -27.7 | 1.7   | -39.1 | -3.3  | -43.1 | -9.6  | -21.0 | -1.9  |
| 334-345 | βsheets, H6    | -61.9 | -28.1 | -38.6 | -35.8 | -44.4 | -3.8  | -48.9 | -18.8 | -50.3 | -49.7 | -49.0 | -44.2 | -66.8 | -26.0 | -57.4 | -28.2 | -34.4 | -29.6 | -36.6 | -26.3 | -42.4 | -4.5  | -35.3 | -4.3  | -34.5 | -19.2 | -39.2 | 1.8   | -53.9 | -9.6  | -37.0 | -6.9  | -18.2 | -0.4  |
| 341-346 | H6-H7          | -51.7 | -24.4 | -43.0 | -33.5 | -64.8 | -11.4 | -53.0 | -14.0 | -68.0 | -61.0 | -62.9 | -52.3 | -52.6 | -29.9 | -72.8 | -33.3 | -31.9 | -19.4 | -18.4 | 2.6   | -48.1 | -4.7  | -39.4 | -2.1  | -41.4 | -10.0 | -32.0 | -0.3  | -45.2 | -6.9  | -50.2 | -10.5 | -25.3 | -4.1  |
| 341-347 | H6-H7          | -45.0 | -19.8 | -33.8 | -25.4 | -44.7 | -7.8  | -40.7 | -8.6  | -53.4 | -46.1 | -51.6 | -43.9 | -46.3 | -27.6 | -51.1 | -23.3 | -27.0 | -17.2 | -13.2 | 3.3   | -41.7 | -5.0  | -32.2 | -2.4  | -34.7 | -9.8  | -26.7 | -3.1  | -38.7 | -7.2  | -41.2 | -7.2  | -21.3 | 0.6   |
| 341-348 | H6-H7          | -43.2 | -20.1 | -29.1 | -24.4 | -37.8 | -7.7  | -35.3 | -8.9  | -48.7 | -35.8 | -44.1 | -36.6 | -43.9 | -24.6 | -42.8 | -16.2 | -25.3 | -18.5 | -6.6  | -3.5  | -38.5 | -2.0  | -31.5 | -1.5  | -27.4 | -9.7  | -22.2 | 2.0   | -35.7 | 0.0   | -32.6 | -0.1  | -20.0 | 1.4   |
| 341-349 | H6-H7          | -42.2 | -26.9 | -26.1 | -26.9 | -41.5 | -9.8  | -41.0 | -13.9 | -52.5 | -45.9 | -48.4 | -42.1 | -43.1 | -30.5 | -42.9 | -21.4 | -23.7 | -21.5 | -10.9 | -1.3  | -34.9 | -0.3  | -28.3 | -3.5  | -33.2 | -13.3 | -23.3 | -1.6  | -39.2 | -8.0  | -39.6 | -10.9 | -20.7 | -2.6  |
| 347-355 | H7             | -25.8 | -43.5 | -30.6 | -62.8 | -38.6 | -47.1 | -33.0 | -50.9 | -36.7 | -71.4 | -37.6 | -79.1 | -26.4 | -45.4 | -37.6 | -52.2 | -28.6 | -49.8 | -18.7 | -40.0 | -33.7 | -31.9 | -30.0 | -32.9 | -33.7 | -55.9 | -26.9 | -21.4 | -34.1 | -41.9 | -30.0 | -45.9 | -19.9 | -24.9 |
| 348-355 | H7             | -22.2 | -42.3 | -17.2 | -47.6 | -34.4 | -54.1 | -27.7 | -48.3 | -27.2 | -65.2 | -29.4 | -68.9 | -21.7 | -42.7 | -42.8 | -42.2 | -14.8 | -35.5 | -17.9 | -39.9 | -25.1 | -29.8 | -19.9 | -30.3 | -26.1 | -47.3 | -16.8 | -26.8 | -23.7 | -42.7 | -23.6 | -44.5 | -13.9 | -28.3 |
| 349-354 | H7             | -24.7 | -42.5 | -20.3 | -46.0 | -30.2 | -45.4 | -25.9 | -43.9 | -28.8 | -65.5 | -28.8 | -61.9 | -24.1 | -42.5 | -37.4 | -42.4 | -16.8 | -28.8 | -6.0  | -36.6 | -23.1 | -29.5 | -20.4 | -31.7 | -24.4 | -44.8 | -15.5 | -31.0 | -23.6 | -39.9 | -22.9 | -40.3 | -13.1 | -30.6 |
| 349-355 | H7             | -25.2 | -48.1 | -20.7 | -48.4 | -32.4 | -49.6 | -26.6 | -46.4 | -28.9 | -67.5 | -30.6 | -64.5 | -23.7 | -48.6 | -38.9 | -39.6 | -17.2 | -33.6 | -12.0 | -42.5 | -23.9 | -31.3 | -22.1 | -33.0 | -25.7 | -47.1 | -17.0 | -31.0 | -23.2 | -43.0 | -24.4 | -45.6 | -14.0 |       |

|         |            |       |       |       |       |       |       |       |       |       |       |       |       |       |       |       |       |       |       |      |      |       |       |       |       |       |       |       |       |       |       |       |       |       |       |
|---------|------------|-------|-------|-------|-------|-------|-------|-------|-------|-------|-------|-------|-------|-------|-------|-------|-------|-------|-------|------|------|-------|-------|-------|-------|-------|-------|-------|-------|-------|-------|-------|-------|-------|-------|
| 406-421 | H9-H10     | -0,8  | -3,5  | 1,6   | -0,3  | -1,7  | -5,9  | -1,7  | -1,1  | -3,2  | -7,2  | -2,3  | -3,1  | 0,1   | -7,2  | -3,7  | -7,7  | 2,1   | -0,2  | -0,7 | -2,1 | -2,2  | -2,0  | -3,4  | -3,9  | -1,0  | -5,3  | -4,0  | -5,2  | -3,3  | -5,6  | -4,5  | -7,1  | -2,2  | -5,7  |
| 407-421 | H9-H10     | -4,7  | -8,2  | 3,6   | -2,2  | -1,2  | -2,8  | -1,1  | -6,5  | -3,6  | -8,0  | 1,2   | -2,3  | -11,9 | -9,1  | -5,4  | -8,9  | -0,2  | -2,1  | 0,3  | -2,3 | -0,4  | -2,8  | -1,1  | -3,3  | -0,4  | -4,3  | -4,1  | -3,3  | -2,8  | -2,8  | -1,9  | -4,0  | -1,7  | -4,4  |
| 423-428 | H10/11     | -2,3  | -0,3  | -3,5  | 7,9   | -1,2  | 0,3   | -3,0  | -0,9  | -0,3  | -4,5  | -2,9  | -4,8  | -0,3  | -4,0  | -7,5  | -15,7 | -8,7  | -4,5  | -2,1 | -5,7 | -2,6  | -0,8  | -3,0  | -7,3  | -4,8  | -2,4  | -4,7  | -7,1  | -3,3  | -5,8  | -0,9  | -5,4  | -0,3  | -5,2  |
| 424-428 | H10/11     | -3,7  | -2,3  | -4,2  | 1,0   | -3,8  | -7,8  | -4,6  | -4,3  | -2,1  | -7,7  | -4,5  | -9,3  | -0,9  | -5,7  | -8,5  | -13,5 | -10,8 | -10,0 | -2,8 | -5,2 | -5,3  | -5,0  | -4,9  | -8,8  | -7,2  | -5,7  | -5,7  | -7,7  | -5,5  | -8,1  | -0,6  | -8,1  | -3,1  | -6,6  |
| 426-434 | H10/11     | -22,5 | -21,9 | -16,8 | -18,7 | -22,3 | -13,1 | -25,4 | -21,3 | -27,5 | -29,5 | -27,0 | -24,1 | -21,9 | -21,9 | -35,3 | -23,0 | -11,4 | -8,4  | 1,4  | 2,2  | -22,2 | -15,1 | -21,2 | -17,2 | -28,6 | -18,2 | -22,5 | -15,5 | -27,0 | -22,2 | -21,1 | -21,8 | -15,5 | -12,3 |
| 426-440 | H10/11     | -44,1 | -28,4 | -37,0 | -27,7 | -33,4 | -8,0  | -46,6 | -22,9 | -50,6 | -44,1 | -49,0 | -31,8 | -43,5 | -23,9 | -40,3 | -25,1 | -15,4 | -10,0 | 2,4  | 2,9  | -38,0 | -10,8 | -32,8 | -11,3 | -45,1 | -17,9 | -31,5 | -12,2 | -44,0 | -21,8 | -40,7 | -22,4 | -24,4 | -7,7  |
| 426-441 | H10/11     | -46,2 | -29,4 | -37,0 | -27,6 | -35,2 | -7,5  | -47,1 | -22,0 | -53,2 | -45,3 | -49,8 | -28,5 | -44,5 | -23,0 | -41,1 | -23,7 | -14,7 | -11,3 | 2,8  | 4,0  | -38,4 | -8,9  | -33,2 | -9,7  | -46,0 | -16,7 | -32,5 | -10,5 | -46,0 | -20,2 | -43,1 | -22,4 | -25,2 | -7,4  |
| 428-440 | H10/11     | -52,4 | -28,0 | -40,5 | -28,0 | -39,3 | -3,4  | -59,2 | -20,6 | -58,9 | -48,2 | -60,3 | -33,7 | -49,2 | -23,6 | -48,3 | -27,5 | -16,9 | -11,7 | 5,8  | 8,4  | -35,6 | -6,9  | -35,7 | -7,2  | -50,3 | -13,2 | -36,1 | -8,6  | -50,5 | -18,6 | -48,4 | -22,2 | -27,9 | -5,6  |
| 429-440 | H10/11     | -60,6 | -30,6 | -45,6 | -32,7 | -42,1 | -3,5  | -56,3 | -23,5 | -64,4 | -51,8 | -60,2 | -33,0 | -58,1 | -27,4 | -50,7 | -26,2 | -15,5 | -10,7 | 4,3  | 5,8  | -46,1 | -4,6  | -38,7 | -4,2  | -52,3 | -15,9 | -36,8 | -6,9  | -53,9 | -18,4 | -52,6 | -21,1 | -29,7 | -5,4  |
| 429-441 | H10/11     | -63,6 | -31,8 | -44,8 | -32,1 | -44,1 | -2,7  | -57,4 | -22,2 | -66,9 | -52,2 | -60,9 | -29,0 | -59,6 | -25,5 | -51,4 | -26,1 | -15,7 | -12,3 | 4,7  | 6,6  | -46,6 | -3,0  | -39,6 | -2,5  | -53,7 | -15,2 | -36,4 | -6,0  | -55,4 | -17,6 | -54,5 | -20,4 | -29,9 | -4,9  |
| 441-453 | H10/11-H12 | -16,0 | -1,5  | -12,8 | -2,7  | -5,0  | 1,0   | -16,1 | -1,6  | -21,7 | -3,4  | -17,4 | -1,3  | -13,6 | -0,5  | -15,5 | -5,4  | -5,7  | -2,6  | 1,9  | -1,2 | -12,4 | -0,1  | -8,5  | 0,4   | -14,9 | -2,2  | -8,1  | 1,9   | -16,1 | 1,7   | -15,5 | 1,1   | -4,5  | 3,5   |
| 441-454 | H10/11-H12 | -20,6 | -1,1  | -18,1 | -2,9  | -5,3  | 0,9   | -22,1 | -1,0  | -29,0 | -5,5  | -22,0 | 1,1   | -16,5 | -2,9  | -20,4 | -5,1  | -7,2  | -3,9  | 2,9  | 0,3  | -15,7 | 1,5   | -10,6 | 2,0   | -18,3 | 0,8   | -9,9  | 1,7   | -20,6 | 1,9   | -20,4 | 0,7   | -5,5  | 3,1   |
| 442-453 | H10/11-H12 | -14,5 | -1,3  | -11,3 | -3,0  | -5,2  | 0,9   | -14,6 | -0,7  | -18,6 | -4,3  | -15,3 | -2,7  | -12,5 | -1,6  | -13,9 | -3,7  | -6,7  | -2,6  | 1,3  | -0,7 | -11,8 | 0,1   | -9,6  | 0,9   | -13,0 | -1,6  | -7,6  | 0,9   | -14,7 | 0,6   | -13,4 | 0,9   | -4,1  | 2,8   |
| 441-456 | H10/11-H12 | -31,6 | -2,0  | -15,3 | -0,3  | -12,5 | 2,3   | -26,0 | 1,7   | -42,8 | -18,8 | -29,9 | 5,5   | -26,1 | -3,5  | -28,7 | -0,9  | -7,8  | -1,8  | 3,5  | 3,8  | -22,2 | 6,6   | -17,6 | 6,7   | -26,6 | -12,6 | -20,9 | 5,2   | -29,7 | 2,6   | -32,2 | -5,4  | -12,0 | 1,9   |
| 441-457 | H10/11-H12 | -33,8 | -5,6  | -22,5 | -2,7  | -14,9 | 1,4   | -32,4 | -3,9  | -43,9 | -14,5 | -34,3 | -1,6  | -28,9 | -5,0  | -34,9 | -6,7  | -4,9  | -3,0  | 1,8  | 0,5  | -29,5 | 2,7   | -20,8 | 3,5   | -33,6 | -6,3  | -17,7 | 5,2   | -33,1 | 0,4   | -30,7 | 0,0   | -13,3 | 4,4   |
| 454-461 | H12        | -31,3 | -6,4  | -23,5 | -4,7  | -23,3 | 1,0   | -33,8 | -5,7  | -39,1 | -16,8 | -33,9 | -6,4  | -31,4 | -4,6  | -31,5 | -9,6  | -5,2  | -1,2  | 3,2  | 0,6  | -30,6 | -2,8  | -25,2 | -0,5  | -33,6 | -4,7  | -24,0 | -1,3  | -36,9 | -6,2  | -34,6 | -7,6  | -17,1 | 2,1   |
| 455-460 | H12        | -32,3 | -7,7  | -24,1 | -3,8  | -20,1 | 6,8   | -33,8 | -4,6  | -40,1 | -17,1 | -36,4 | -6,2  | -32,7 | -7,0  | -31,4 | -8,8  | -7,6  | -1,2  | 2,3  | -2,2 | -33,6 | -3,7  | -28,1 | -1,4  | -36,5 | -10,0 | -31,5 | -11,8 | -39,6 | -16,6 | -36,1 | -7,7  | -17,4 | 1,2   |
| 455-461 | H12        | -22,0 | -2,6  | -16,0 | -8,3  | -15,3 | -0,9  | -22,9 | -12,2 | -31,9 | -13,7 | -17,7 | -3,3  | -24,2 | -2,9  | -23,5 | -6,9  | -3,3  | -6,6  | 16,2 | 7,5  | -15,0 | -1,9  | -7,9  | 0,3   | -13,2 | -0,9  | -16,0 | 1,0   | -29,4 | -3,2  | -25,1 | -4,5  | -5,9  | 0,0   |
| 457-461 | H12        | 1,5   | 0,7   | -0,2  | 1,9   | 1,4   | -1,1  | 2,0   | 4,4   | 5,7   | 6,3   | -3,2  | 0,1   | 0,4   | 0,8   | -2,2  | 0,8   | -1,0  | 4,5   | -0,4 | 5,7  | 0,2   | 4,2   | 1,5   | 8,0   | -0,3  | 7,7   | 0,4   | 4,1   | -1,0  | 5,2   | 3,3   | 6,2   | 7,4   | 9,5   |

**Supplementary Table 2: Crystallographic data and refinement.**

**Related to Figure 2**

|                                       | LXRβ-AZ3                              | LXRβ-AZ6                                     | LXRβ-AZ8                              | LXRβ-WAY-254011                        |       |
|---------------------------------------|---------------------------------------|----------------------------------------------|---------------------------------------|----------------------------------------|-------|
| <b>Data collection</b>                |                                       |                                              |                                       |                                        |       |
| Space group                           | P3 <sub>2</sub> 2                     | P2 <sub>1</sub>                              | P3 <sub>2</sub> 2 <sub>1</sub>        | I4 <sub>1</sub> 22                     |       |
| Cell dimensions                       | a=125.1 Å,<br>b=125.1 Å,<br>c=125.1 Å | a=55.4 Å,<br>b=109.4 Å,<br>c=89.0 Å, β=90.9° | a=58.7 Å,<br>b=58.7 Å,<br>c=148.0 Å   | a= 135.3 Å,<br>b=135.3 Å,<br>c=69.73 Å |       |
| Resolution (Å)                        | 20.0 – 3.0<br>(3.23-3.0) <sup>1</sup> | 89.1 – 1.9<br>(2.0-1.9) <sup>1</sup>         | 24.0– 1.6<br>(1.69-1.60) <sup>1</sup> | 95.8– 2.0<br>(2.11-2.0) <sup>1</sup>   |       |
| R <sub>merge</sub>                    | 0.081 (0.48)                          | 0.093 (0.59)                                 | 0.055 (0.45)                          | 0.093 (0.62)                           |       |
| <I / σI>                              | 16.6 (4.9)                            | 8.3 (1.7)                                    | 8.3 (1.8)                             | 5.5 (1.3)                              |       |
| Completeness (%)                      | 99.8 (100)                            | 92.7 (86.8)                                  | 96.2 (81.6)                           | 99.8 (100)                             |       |
| Redundancy                            | - (-)                                 | 2.0 (1.9)                                    | 4.9 (3.1)                             | 9.2 (9.5)                              |       |
| <b>Refinement</b>                     |                                       |                                              |                                       |                                        |       |
| Measured / unique refl.               | - / 30616                             | 150698 / 80516                               | 475154 / 38673                        | 203885 / 22128                         |       |
| R <sub>work</sub> / R <sub>free</sub> | 0.241 / 0.271                         | 0.203 / 0.259                                | 0.240 / 0.251                         | 0.222 / 0.254                          |       |
| <b>No. atoms</b>                      |                                       |                                              |                                       |                                        |       |
| Protein                               |                                       | 5742                                         | 7695                                  | 1924                                   | 1933  |
| Water                                 |                                       | 18 -                                         |                                       | 338                                    | 30    |
| Ligand                                |                                       | 96                                           | 245                                   |                                        | 78    |
| <b>Average B-factors</b>              |                                       |                                              |                                       |                                        |       |
| Protein (Å <sup>2</sup> )             |                                       | 74,5                                         | 22,5                                  | 42,2                                   | 35,8  |
| Water (Å <sup>2</sup> )               |                                       | 53,6 -                                       |                                       | 35,2                                   | 46,5  |
| Ligand (Å <sup>2</sup> )              |                                       | 80,5                                         | 29,8                                  | 20,8                                   | 28,2  |
| <b>R.m.s deviations</b>               |                                       |                                              |                                       |                                        |       |
| Bond lengths (Å)                      |                                       | 0,007                                        | 0,011 -                               |                                        | 0,014 |
| Bond angles (°)                       |                                       | 0,98                                         | 1,4 -                                 |                                        | 1,8   |

<sup>1</sup> Values in parentheses refer to highest-resolution shell

**Supplementary Table 3: Peptides with highest contribution to the discrimination between lipogenic and non-lipogenic compounds.**

**Related to Figure 3**

Significance selection criteria included correlation coefficients ( $|p(\text{corr})| > 0.7$ ) and the coefficients of contribution to the model separation between TG classes ( $p > 0.05$ ).

| Peptide                                                                    | LXR isoform & Labelling Time | Amino Acid Sequence | Secondary Structure | OPLS-DA   |          | Lipogenic (n = 5) vs non-lipogenic (n = 7): unpaired t-test |                 |                |
|----------------------------------------------------------------------------|------------------------------|---------------------|---------------------|-----------|----------|-------------------------------------------------------------|-----------------|----------------|
|                                                                            |                              |                     |                     | p         | p(corr)  | P-value                                                     | P-value summary | t, df*         |
| <b>TG OPLS-DA: LXR<math>\alpha</math> and LXR<math>\beta</math> HDX-MS</b> |                              |                     |                     |           |          |                                                             |                 |                |
| 270-275                                                                    | LXR $\alpha$ /30 sec         | DFAKQL              | H3                  | 0,0744295 | 0,697956 | 0,0189                                                      | *               | t=2,681, df=13 |
| 412-426                                                                    | LXR $\alpha$ /30 sec         | VSLRTLSSVHSEQVF     | H10/11              | 0,092981  | 0,715587 | 0,0344                                                      | *               | t=2,362, df=13 |
| 412-427                                                                    | LXR $\alpha$ /30 sec         | VSLRTLSSVHSEQVFA    | H10/11              | 0,0971066 | 0,721315 | 0,0304                                                      | *               | t=2,429, df=13 |
| 414-426                                                                    | LXR $\alpha$ /30 sec         | LRTLSSVHSEQVF       | H10/11              | 0,104203  | 0,734507 | 0,027                                                       | *               | t=2,492, df=13 |
| 414-427                                                                    | LXR $\alpha$ /30 sec         | LRTLSSVHSEQVFA      | H10/11              | 0,116561  | 0,74986  | 0,0204                                                      | *               | t=2,639, df=13 |
| 415-426                                                                    | LXR $\alpha$ /30 sec         | RTLSSVHSEQVF        | H10/11              | 0,116667  | 0,74078  | 0,0279                                                      | *               | t=2,474, df=13 |
| 415-427                                                                    | LXR $\alpha$ /30 sec         | RTLSSVHSEQVFA       | H10/11              | 0,124186  | 0,748133 | 0,0199                                                      | *               | t=2,652, df=13 |
| 428-441                                                                    | LXR $\alpha$ /30 sec         | LRLQDKKLPLLSE       | H10/11-H12          | 0,0510492 | 0,773292 | 0,0132                                                      | *               | t=2,869, df=13 |
| 427-443                                                                    | LXR $\alpha$ /30 sec         | ALRLQDKKLPLLSEIW    | H10/11-H12          | 0,0827411 | 0,775786 | 0,013                                                       | *               | t=2,875, df=13 |
| 428-442                                                                    | LXR $\alpha$ /30 sec         | LRLQDKKLPLLSEI      | H10/11-H12          | 0,0652641 | 0,741346 | 0,0354                                                      | *               | t=2,347, df=13 |
| 428-443                                                                    | LXR $\alpha$ /30 sec         | LRLQDKKLPLLSEIW     | H10/11-H12          | 0,0834724 | 0,711789 | 0,0699                                                      | ns              | t=1,975, df=13 |
| 440-447                                                                    | LXR $\alpha$ /30 sec         | SEIWDVHE            | H12                 | 0,0934413 | 0,825616 | 0,0084                                                      | **              | t=3,104, df=13 |
| 441-446                                                                    | LXR $\alpha$ /30 sec         | EIWDVH              | H12                 | 0,116567  | 0,920834 | 0,0005                                                      | ***             | t=4,654, df=13 |
| 214-219                                                                    | LXR $\alpha$ /600 sec        | IEKLVA              | H1                  | 0,11695   | 0,825104 | 0,0011                                                      | **              | t=4,160, df=13 |
| 290-296                                                                    | LXR $\alpha$ /600 sec        | LKTS AIE            | H5                  | 0,0811372 | 0,743081 | 0,0061                                                      | **              | t=3,270, df=13 |
| 326-331                                                                    | LXR $\alpha$ /600 sec        | FAKAGL              | H6                  | 0,0735871 | 0,697892 | 0,0024                                                      | **              | t=3,762, df=13 |
| 327-331                                                                    | LXR $\alpha$ /600 sec        | AKAGL               | H6                  | 0,0850626 | 0,759729 | 0,0009                                                      | ***             | t=4,300, df=13 |
| 333-341                                                                    | LXR $\alpha$ /600 sec        | VEFINPIFE           | H7                  | 0,116319  | 0,727585 | 0,006                                                       | **              | t=3,275, df=13 |
| 333-345                                                                    | LXR $\beta$ /30 sec          | FTYSKDDFHRAGL       | $\beta$ sheets, H6  | 0,0952277 | 0,887247 | <0,0001                                                     | ****            | t=5,865, df=13 |
| 333-346                                                                    | LXR $\beta$ /30 sec          | FTYSKDDFHRAGLQ      | $\beta$ sheets, H6  | 0,0902183 | 0,870471 | <0,0001                                                     | ****            | t=6,063, df=13 |
| 341-346                                                                    | LXR $\beta$ /30 sec          | HRAGLQ              | H6-H7               | 0,143145  | 0,818952 | 0,001                                                       | **              | t=4,215, df=13 |
| 341-347                                                                    | LXR $\beta$ /30 sec          | HRAGLQV             | H6-H7               | 0,107901  | 0,837063 | 0,0028                                                      | **              | t=3,677, df=13 |
| 341-348                                                                    | LXR $\beta$ /30 sec          | HRAGLQVE            | H6-H7               | 0,100804  | 0,791383 | 0,0076                                                      | **              | t=3,156, df=13 |
| 341-349                                                                    | LXR $\beta$ /30 sec          | HRAGLQVEF           | H6-H7               | 0,108573  | 0,833864 | 0,0057                                                      | **              | t=3,308, df=13 |
| 349-354                                                                    | LXR $\beta$ /30 sec          | FINPIF              | H7                  | 0,0599492 | 0,705961 | 0,0102                                                      | *               | t=3,004, df=13 |
| 349-355                                                                    | LXR $\beta$ /30 sec          | FINPIFE             | H7                  | 0,0547438 | 0,70169  | 0,0104                                                      | *               | t=2,990, df=13 |
| 429-440                                                                    | LXR $\beta$ /30 sec          | RTLSSVHSEQVF        | H10/11              | 0,154339  | 0,717002 | 0,0236                                                      | *               | t=2,562, df=13 |
| 429-441                                                                    | LXR $\beta$ /30 sec          | RTLSSVHSEQVFA       | H10/11              | 0,161647  | 0,724354 | 0,0234                                                      | *               | t=2,567, df=13 |
| 441-453                                                                    | LXR $\beta$ /30 sec          | ALRLQDKKLPLL        | H10/11-H12          | 0,0501846 | 0,713708 | 0,0661                                                      | ns              | t=2,006, df=13 |
| 441-454                                                                    | LXR $\beta$ /30 sec          | ALRLQDKKLPLL S      | H10/11-H12          | 0,0680182 | 0,713626 | 0,057                                                       | ns              | t=2,088, df=13 |
| 441-457                                                                    | LXR $\beta$ /30 sec          | ALRLQDKKLPLLSEIW    | H10/11-H12          | 0,104948  | 0,723603 | 0,0853                                                      | ns              | t=1,863, df=13 |
| 304-310                                                                    | LXR $\beta$ /600 sec         | LKASTIE             | H5                  | 0,0945143 | 0,698917 | 0,0563                                                      | ns              | t=2,095, df=13 |
| 305-310                                                                    | LXR $\beta$ /600 sec         | KASTIE              | H5                  | 0,0936218 | 0,7409   | 0,0259                                                      | *               | t=2,515, df=13 |
| 333-345                                                                    | LXR $\beta$ /600 sec         | FTYSKDDFHRAGL       | $\beta$ sheets, H6  | 0,131977  | 0,733755 | 0,0023                                                      | **              | t=3,774, df=13 |
| 333-346                                                                    | LXR $\beta$ /600 sec         | FTYSKDDFHRAGLQ      | $\beta$ sheets, H6  | 0,14834   | 0,736355 | 0,003                                                       | **              | t=3,646, df=13 |
| 341-346                                                                    | LXR $\beta$ /600 sec         | HRAGLQ              | H6-H7               | 0,176995  | 0,796951 | 0,0022                                                      | **              | t=3,798, df=13 |
| 341-347                                                                    | LXR $\beta$ /600 sec         | HRAGLQV             | H6-H7               | 0,130883  | 0,756441 | 0,0055                                                      | **              | t=3,324, df=13 |
| 341-348                                                                    | LXR $\beta$ /600 sec         | HRAGLQVE            | H6-H7               | 0,108676  | 0,738019 | 0,0037                                                      | **              | t=3,531, df=13 |
| 341-349                                                                    | LXR $\beta$ /600 sec         | HRAGLQVEF           | H6-H7               | 0,131281  | 0,768548 | 0,0029                                                      | **              | t=3,656, df=13 |
| 348-355                                                                    | LXR $\beta$ /600 sec         | EFINPIFE            | H7                  | 0,10038   | 0,718621 | 0,0069                                                      | **              | t=3,208, df=13 |
| 349-354                                                                    | LXR $\beta$ /600 sec         | FINPIF              | H7                  | 0,0989918 | 0,79585  | 0,0046                                                      | **              | t=3,419, df=13 |
| 349-355                                                                    | LXR $\beta$ /600 sec         | FINPIFE             | H7                  | 0,097601  | 0,769606 | 0,0056                                                      | **              | t=3,317, df=13 |
| 426-434                                                                    | LXR $\beta$ /600 sec         | VSLRTLSSV           | H10/11              | 0,0628284 | 0,712973 | 0,0291                                                      | *               | t=2,452, df=13 |
| 426-440                                                                    | LXR $\beta$ /600 sec         | VSLRTLSSVHSEQVF     | H10/11              | 0,107806  | 0,792896 | 0,0071                                                      | **              | t=3,189, df=13 |
| 426-441                                                                    | LXR $\beta$ /600 sec         | VSLRTLSSVHSEQVFA    | H10/11              | 0,109961  | 0,7865   | 0,0067                                                      | **              | t=3,220, df=13 |
| 428-440                                                                    | LXR $\beta$ /600 sec         | LRTLSSVHSEQVF       | H10/11              | 0,129789  | 0,785936 | 0,006                                                       | **              | t=3,273, df=13 |
| 429-440                                                                    | LXR $\beta$ /600 sec         | RTLSSVHSEQVF        | H10/11              | 0,143264  | 0,803832 | 0,0034                                                      | **              | t=3,578, df=13 |
| 429-441                                                                    | LXR $\beta$ /600 sec         | RTLSSVHSEQVFA       | H10/11              | 0,141402  | 0,785316 | 0,0044                                                      | **              | t=3,442, df=13 |

\* t: t-values, df: degrees of freedom

**Supplementary Table 4: Differences in deuteration levels (% of maximal deuteration) of LXR LBDs in presence of the SRC1 coactivator peptide and different ligands.**

**Related to Figure 3**

Deuterium uptake values for all peptides were corrected to back exchange using the fully deuterated controls. Missing peptides are shown in dark grey. HDX-MS measurements were performed in triplicates and the average values are shown. Color scheme is identical to Figure 2.

| Peptide     | Secondary Structure | TD-091317 |         | WAY-254011 |         | F1     |         | AZ876  |         | AZ1    |         | AZ2    |         | AZ3    |         | AZ4    |         | GW3965 |         | BMS-852921 |         | AZ5    |         | AZ7    |         | LXR-823 |         | AZ8    |         | AZ9    |         | AZ5    |         | 24-25EC |       |
|-------------|---------------------|-----------|---------|------------|---------|--------|---------|--------|---------|--------|---------|--------|---------|--------|---------|--------|---------|--------|---------|------------|---------|--------|---------|--------|---------|---------|---------|--------|---------|--------|---------|--------|---------|---------|-------|
|             |                     | 30 sec    | 600 sec | 30 sec     | 600 sec | 30 sec | 600 sec | 30 sec | 600 sec | 30 sec | 600 sec | 30 sec | 600 sec | 30 sec | 600 sec | 30 sec | 600 sec | 30 sec | 600 sec | 30 sec     | 600 sec | 30 sec | 600 sec | 30 sec | 600 sec | 30 sec  | 600 sec | 30 sec | 600 sec | 30 sec | 600 sec | 30 sec | 600 sec |         |       |
| <b>LXRα</b> |                     |           |         |            |         |        |         |        |         |        |         |        |         |        |         |        |         |        |         |            |         |        |         |        |         |         |         |        |         |        |         |        |         |         |       |
| 200-210     | H1                  | 1,7       | -5,9    | -0,9       | -8,9    | -2,0   | -2,3    | -1,2   | 1,5     | -4,8   | -7,6    | -2,3   | -8,4    | -1,0   | -2,5    | 2,5    | -8,1    | -0,5   | -8,5    | 3,7        | -8,6    | 2,0    | -0,5    | -8,3   | -2,0    | -7,2    | 1,4     | 1,2    | 9,9     | -5,6   | -1,1    | -9,2   | -3,5    | -4,6    |       |
| 200-213     | H1                  | 6,4       | -0,5    | 2,6        | -1,8    | 6,0    | 2,1     | 3,1    | -0,3    | 2,9    | -2,7    | -1,7   | -5,4    | 3,8    | 1,7     | 3,1    | -0,2    | 1,5    | -2,0    | 7,3        | -0,4    | 5,4    | 3,1     | 4,5    | -0,2    | -1,8    | -3,7    | 3,6    | -1,9    | 3,3    | 0,8     | -2,4   | -5,2    | 4,4     | -0,4  |
| 204-213     | H1                  | 6,9       | -1,3    | -0,6       | -1,9    | 3,4    | -0,5    | -1,5   | -1,8    | -1,0   | -2,3    | -4,3   | -5,7    | -1,2   | -1,1    | -0,2   | 0,9     | -2,0   | -6,0    | 6,2        | -2,0    | 4,5    | 3,2     | 0,6    | 0,6     | -5,0    | -3,1    | -0,9   | -0,3    | -0,8   | 0,5     | -3,5   | -5,4    | 0,5     | -3,6  |
| 208-213     | H1                  | 5,8       | 1,7     | 3,8        | -6,3    | 3,5    | 2,8     | -2,5   | -14,9   | -3,5   | -5,9    | 5,1    | 3,7     | 3,0    | 2,8     | 2,4    | -1,0    | 0,2    | -1,4    | 5,2        | 1,1     | 4,6    | 4,2     | 2,8    | -3,1    | 0,5     | -11,5   | -1,4   | -7,0    | 1,0    | -2,6    | 7,7    | 6,5     | 7,6     | 2,1   |
| 214-219     | H1                  | -19,0     | -28,6   | -17,8      | -49,6   | -15,5  | -39,2   | -19,7  | -47,1   | -20,0  | -48,3   | -17,1  | -41,9   | -19,8  | -39,7   | -19,4  | -47,0   | -18,1  | -32,4   | -20,9      | -29,4   | -23,1  | -40,1   | -12,8  | -41,8   | -18,2   | -36,9   | -10,4  | -20,3   | -17,5  | -42,7   | -14,6  | -29,3   | -20,2   | -36,4 |
| 214-233     | H1                  | -17,7     | -13,2   | -22,1      | -23,0   | -18,8  | -17,2   | -22,0  | -20,8   | -18,0  | -18,0   | -22,5  | -20,5   | -17,0  | -13,5   | -18,6  | -17,7   | -15,6  | -15,0   | -15,1      | -12,5   | -22,0  | -13,5   | -17,3  | -15,5   | -17,8   | -16,6   | -13,9  | -12,6   | -16,9  | -15,9   | -18,6  | -16,0   | -19,4   | -17,7 |
| 220-233     | H1                  | -9,1      | -8,1    | -12,3      | -8,4    | -9,1   | -3,5    | -11,6  | -7,4    | -10,7  | -7,0    | -13,9  | -11,7   | -9,9   | -4,6    | -9,2   | -4,3    | -9,0   | -8,1    | -7,7       | -7,5    | -10,7  | -2,2    | -10,9  | -5,0    | -10,2   | -8,1    | -9,9   | -6,0    | -10,1  | -5,8    | -11,7  | -9,9    | -9,1    | -4,8  |
| 234-240     | loop H1-H3          | 0,2       | 1,2     | -6,3       | 0,3     | -3,5   | 2,4     | -4,3   | -0,6    | -2,2   | -3,3    | -5,7   | -5,3    | -3,3   | 2,3     | -2,5   | -1,2    | -4,2   | -2,7    | 1,2        | 0,4     | -2,0   | 4,3     | -1,9   | 0,9     | -3,6    | -1,5    | -0,3   | -0,2    | -0,8   | 1,5     | -3,6   | -3,5    | -6,8    | -0,3  |
| 234-248     | loop H1-H3          | -3,7      | -4,9    | -9,1       | -6,0    | -1,7   | 8,9     | -22,6  | -5,3    | -4,5   | -5,7    | -8,2   | -4,0    | 0,4    | 10,7    | -4,8   | -4,5    | 5,7    | 8,4     | -2,3       | -1,7    | -5,9   | 1,7     | -3,3   | -1,8    | -5,6    | -6,7    | -7,9   | -7,2    | -7,0   | -0,7    | -3,9   | -1,8    | -3,8    | 10,4  |
| 234-257     | loop H1-H3, H3      | -9,9      | -3,9    | -16,7      | -4,4    | -11,5  | -1,1    | -23,1  | -4,8    | -9,3   | -2,2    | -15,4  | -6,4    | -11,9  | -1,1    | -9,2   | 0,2     | -9,0   | -2,2    | -3,7       | -0,7    | -10,6  | 3,6     | -7,8   | 0,4     | -9,0    | -3,8    | -8,8   | -2,2    | -9,3   | -0,9    | -8,8   | -4,6    | -17,0   | -1,0  |
| 239-257     | loop H1-H3, H3      | -13,0     | -4,5    | -18,5      | -7,2    | -11,3  | -0,6    | -21,9  | -7,1    | -11,3  | -4,5    | -19,3  | -7,8    | -11,5  | -0,3    | -11,0  | -1,8    | -8,8   | -0,8    | -4,4       | -0,8    | -11,4  | 4,6     | -8,4   | -1,9    | -10,1   | -5,7    | -8,1   | -3,9    | -9,7   | -2,8    | -13,7  | -6,2    | -15,9   | 1,0   |
| 241-257     | loop H1-H3, H3      | -5,6      | -6,9    | 0,0        | 4,8     | -5,8   | -2,5    | 2,0    | 5,7     | 2,4    | 5,5     | -9,1   | -7,3    | -6,1   | -3,3    | 4,4    | 7,7     | -8,1   | -7,4    | -3,7       | -5,4    | -5,9   | -1,9    | 1,8    | 7,2     | 2,3     | 5,1     | 4,5    | 8,3     | 2,9    | 8,0     | -10,8  | -6,9    | -8,1    | -3,6  |
| 260-265     | H3                  | -51,0     | -73,3   | -44,9      | -78,8   | -40,6  | -75,4   | -48,3  | -84,2   | -47,4  | -82,2   | -33,9  | -80,8   | -40,6  | -72,7   | -47,5  | -79,6   | -38,5  | -68,6   | -52,2      | -72,2   | -49,1  | -55,6   | -80,6  | -41,5   | -53,9   | -56,0   | -43,7  | -63,6   | -20,3  | -36,6   | -35,6  | -63,5   |         |       |
| 261-267     | H3                  | -49,9     | -67,8   | -44,7      | -78,1   | -41,0  | -69,7   | -46,3  | -81,9   | -45,4  | -78,6   | -41,6  | -64,5   | -39,7  | -64,7   | -43,0  | -70,5   | -41,2  | -64,3   | -51,7      | -69,6   | -47,1  | -54,4   | -41,5  | -63,7   | -38,2   | -54,8   | -40,2  | -54,2   | -39,4  | -56,9   | -27,7  | -27,1   | -35,9   | -51,8 |
| 267-271     | H3                  | 2,7       | -14,7   | -3,4       | -18,8   | -3,3   | -16,2   | -4,7   | -19,0   | -4,8   | -21,4   | 0,1    | -13,3   | -3,7   | -16,1   | -4,2   | -18,8   | -3,1   | -13,0   | 2,7        | -14,9   | 2,3    | -12,5   | -3,5   | -19,3   | -2,1    | -15,3   | -2,8   | -18,7   | -3,3   | -17,4   | 1,5    | -10,2   | -2,8    | -10,2 |
| 271-278     | H3                  | -1,1      | -10,2   | -1,8       | -9,0    | -0,5   | -8,9    | -1,5   | -9,0    | -1,8   | -9,6    | -2,6   | -10,2   | -1,2   | -8,4    | -1,6   | -8,2    | -0,4   | -6,9    | -0,9       | -9,7    | -0,5   | -6,8    | -2,0   | -8,1    | -1,3    | -8,0    | -1,7   | -9,0    | -1,2   | -7,3    | -2,2   | -8,4    | -1,0    | -5,7  |
| 271-281     | H3-H4               | -1,1      | -9,1    | -3,9       | -7,9    | 0,0    | -7,6    | -4,9   | -8,8    | -4,4   | -9,2    | -5,0   | -11,5   | -0,8   | -7,8    | -5,1   | -7,7    | -0,9   | -7,0    | -1,3       | -8,1    | -3,7   | -6,3    | -6,1   | -8,1    | -2,1    | -7,0    | -5,2   | -7,4    | -3,2   | -5,8    | -4,4   | -7,0    | -0,8    | -6,3  |
| 272-278     | H3-H4               | 0,4       | -9,0    | -0,5       | -8,3    | 1,6    | -7,3    | 1,7    | -5,5    | 0,2    | -8,7    | -1,6   | -10,2   | 0,5    | -7,2    | 0,4    | -7,5    | -0,1   | -7,3    | 0,3        | -8,2    | 0,3    | -6,0    | 0,8    | -5,4    | 0,2     | -6,5    | 0,8    | -6,3    | 0,2    | -3,6    | -1,0   | -8,0    | 0,3     | -5,4  |
| 272-281     | H3-H4               | -1,5      | -9,5    | -6,5       | -11,1   | -2,4   | -9,4    | -6,3   | -11,2   | -6,0   | -11,5   | -7,7   | -13,5   | -3,1   | -8,8    | -6,7   | -9,4    | -3,5   | -7,0    | -2,0       | -8,7    | -4,1   | -6,5    | -7,2   | -10,2   | -4,8    | -10,5   | -6,5   | -9,8    | -5,1   | -9,1    | -7,2   | -10,6   | -3,5    | -6,7  |
| 273-278     | H3-H4               | 3,4       | -15,7   | -1,5       | -16,9   | 2,4    | -7,0    | -6,7   | -15,8   | -8,0   | -20,3   | 4,1    | -8,3    | 4,2    | -4,4    | -5,4   | -15,6   | 1,7    | -1,8    | -1,1       | -18,3   | 0,3    | -12,5   | -6,7   | -18,0   | -1,3    | -15,3   | 1,3    | -16,1   | -2,9   | -11,6   | 4,4    | -5,1    | 1,1     | -1,0  |
| 279-286     | H4-H5               | 4,7       | -6,8    | 2,9        | -3,7    | 3,3    | 0,7     | 7,1    | 4,6     | -6,3   | -6,3    | -2,1   | -10,8   | 4,5    | 0,5     | 1,6    | 2,3     | 0,7    | 2,8     | 4,5        | -5,3    | -0,1   | -1,6    | -7,8   | 6,3     | -4,9    | -6,7    | -0,6   | 5,1     | -4,9   | -1,8    | -7,2   | 0,1     | -2,4    |       |
| 280-290     | H4-H5               | -4,0      | -10,7   | -2,8       | -6,9    | -1,1   | -7,9    | -3,9   | -6,5    | -3,1   | -7,5    | -6,7   | -20,0   | -2,3   | -8,2    | -3,1   | -5,7    | -2,1   | -8,2    | -3,7       | -10,9   | -5,2   | -8,5    | -5,1   | -5,3    | -3,2    | -6,1    | -4,0   | -6,6    | -3,4   | -5,7    | -6,7   | -18,2   | -2,2    | -7,9  |
| 282-289     | H4-H5               | 0,4       | -7,8    | -0,7       | -7,4    | 0,0    | -6,8    | -1,1   | -6,7    | -1,3   | -7,1    | -2,5   | -9,7    | -0,8   | -7,1    | -1,2   | -6,1    | -0,9   | -6,6    | -0,1       | -8,0    | -0,2   | -5,9    | -1,4   | -6,5    | -0,5    | -6,8    | -0,4   | -6,8    | 0,0    | -6,3    | -2,3   | -7,4    | -1,7    | -5,0  |
| 282-290     | H4-H5               | 0,4       | -9,0    | 0,7        | -7,4    | 0,2    | -6,6    | 2,5    | -5,4    | -0,3   | -7,1    | -2,3   | -10,4   | 0,3    | -6,2    | 0,7    | -6,8    | -0,3   | -4,9    | -0,4       | -9,1    | -1,0   | -7,9    | 1,2    | -5,3    | 1,2     | -6,7    | 3,2    | -4,6    | 2,0    | -5,5    | -1,5   | -8,2    | 0,5     | -3,7  |
| 285-290     | H5                  | 3,3       | -4,5    | 0,3        | -5,2    | -3,2   | -6,2    | -2,5   | -5,2    | -3,2   | -7,7    | -1,0   | -3,2    | -3,3   | -6,3    | -1,4   | -8,9    | -2,0   | -3,1    | 2,9        | -3,8    | 3,2    | -3,1    | -1,8   | -9,2    | 0,6     | -5,4    | -3,4   | -5,2    | -2,8   | -4,5    | 0,1    | 0,6     | -3,3    | -5,1  |
| 290-294     | H5                  | -32,3     | -51,5   | -27,2      | -61,9   | -27,2  | -51,3   | -29,8  | -64,0   | -26,6  | -62,2   | -25,5  | -58,3   | -29,0  | -55,7   | -26,7  | -62,8   | -29,1  | -53,4   | -28,1      | -32,0   | -32,1  | -53,6   | -28,0  | -60,3   | -23,9   | -53,5   | -30,3  | -60,1   | -25,4  | -58,2   | -15,9  | -45,0   | -27,5   | -48,2 |
| 295-299     | H5-βsheets          | 2,3       | -6,8    | -1,1       | -8,8    | 0,4    | -7,7    | -2,7   | -8,6    | -3,6   | -10,3   | -1,8   | -8,0    | -2,6   | -9,1    | -3,4   | -9,4    | -3,4   | -9,6    | 2,1        | -7,2    | 3,6    | -4,9    | -3,8   | -10,4   | -1,1    | -7,2    | -2,2   | -9,3    | -2,2   | -8,5    | -1,3   | -6,5    | -2,5    | -7,1  |
| 299-311     | H5-βsheets          | -19,4     | -21,6   | -18,5      | -32,9   | -18,0  | -33,8   | -18,2  | -26,4   | -17,4  | -28,1   | -19,4  | -23,5   | -16,2  | -20,1   | -16,4  | -28,0   | -17,4  | -30,9   | -21,6      | -31,7   | -20,7  | -24,4   | -17,0  | -23,5   | -4,3    | -7,3    | -16,7  | -17,6   | -15,1  | -16,5   | -16,3  | -20,7   | -16,0   | -22,2 |
| 299-314     | H5-βsheets          | -29,3     | -27,5   | -30,3      | -44,1   | -29,0  | -40,6   | -30,9  | -34,5   | -29,4  | -40,6   | -27,2  | -34,4   | -26,3  | -32,5   | -27,7  | -36,6   | -26,7  | -37,9   | -33,4      | -41,6   | -30,6  | -32,5   | -28,5  | -30,6   | -18,3   | -15,4   | -26,4  | -25,9   | -25,3  | -20,5   | -20,1  | -21,8   | -23,3   | -28,0 |
| 299-315     | H5-βsheets          | -29,4     | -22,7   | -34,3      | -46,6   | -29,5  | -38,9   | -32,5  | -32,9   | -33,4  | -42,6   | -36,3  | -37,9   | -29,8  | -34,3   | -31,6  | -38,8   | -31,0  | -39,9   | -36,7      | -40,3   | -32,8  | -30,0   | -30,7  | -30,7   | -19,9   | -15,6   | -29,2  | -22,7   | -26,4  | -19,6   | -27,3  | -23,9   | -26,6   | -28,9 |
| 300-311     | H5-βsheets          | -19,7     | -19,8   | -18,5      | -33,6   | -18,6  | -34,5   | -19,5  | -29,7   | -16,6  | -27,4   | -19,3  | -22,2   | -16,7  | -20,0   | -15,3  | -27,1   | -17,7  | -30,5   | -21,7      | -31,2   | -20,7  | -22,9   | -17,5  | -22,8   | -2,8    | -5,2    | -18,0  | -17,5   | -15,0  | -14,8   | -15,4  | -18,6   | -16,2   | -21,2 |
| 300-312     | H5-βsheets          | -26,1     | -24,4   | -25,4      | -39,5   | -24,6  | -39,9   | -28,4  | -35,4   | -23,9  | -33,9   | -25,0  | -29,6   | -22,5  | -27,1   | -21,9  | -32,0   | -23,5  | -35,8   | -28,4      | -36,0   | -27,1  | -26,2   | -24,3  | -26,8   | -11,6   | -11,2   | -24,4  | -20,5   | -21,2  | -19,0   | -19,3  | -20,2   | -21,3   | -26,2 |
| 300-315     | H5-βsheets          | -30,6     | -21,1   | -37,3      | -48,5   | -31,3  | -39,5   | -35,2  | -33,8   | -35,4  | -44,0   | -39,3  | -39,4   | -31,9  | -34,2   | -33,3  | -40,1   | -31,9  | -39,8   | -39,3      | -41,0   | -35,6  | -28,9   | -32,2  | -30,9   | -22,4   | -16,6   | -30,9  | -22,0   | -28,3  | -19,7   | -29,9  | -24,2   | -28,2   | -28,4 |
| 312-316     | βsheets             | -24,8     | -3,2    | -69,1      | -54,1   | -37,4  | -22,9   | -38,5  | -14,6   | -62,8  | -42,2   | -52,6  | -30,8   | -51,0  | -34,3   | -62,5  | -36,0   | -52,1  | -36,8   | -45,7      | -31,7   | -56,3  | -20,9   | -56,5  | -22,8   | -32,4   | -16,7   | -33,2  | -12,6   | -31,2  | -8,6    | -31,4  | -14,3   | -45,1   | -24,9 |
| 316-326     | βsheets-H6          | -29,5     | -30,6   | -37,6      | -32,0   | -33,6  | -32,8   | -30,9  | -33,2   | -30,9  | -31,1   | -31,9  | -31,8   | -28,0  | -30,2   | -31,6  | -24,6   | -32,3  | -31,1   | -34,4      | -32,2   | -33,8  | -21,4   | -28,7  | -23,6   | -27,3   | -25,0   | -25,2  | -22,1   | -25,5  | -22,8   | -24,5  | -21,1   | -27,3   | -26,2 |
| 319-324     | βsheets-H6          | -11,6     | -11,8   | -15,5      | -12,0   | -9,3   | -12,2   | -12,8  | -7,2    | -10,9  | -11,6   | -6,6   | -7,3    | -8,3   | -9,5    | -11,3  | -7,5    | -9,1   | -11,3   | -9,4       | -10,5   | -10,3  | -6,9    | -8,8   | -2,8    | -12,8   | -5,6    | -1,7   | -0,1    | -7,6   | -2,0    | -5,7   | 1,4     | -11,8   | -7,5  |
| 319-326     | βsheets-H6          | -39,3     | -38,7   | -42,2      | -45,2   | -35,3  | -43,8   | -42,6  | -47,4   | -39,0  | -45,0   | -39,7  | -43,0   | -34,5  | -38,8   | -37,5  | -38,7   |        |         |            |         |        |         |        |         |         |         |        |         |        |         |        |         |         |       |

|         |            |       |       |       |       |       |       |       |       |       |       |       |       |       |       |       |       |       |       |      |       |       |       |       |       |       |       |       |       |       |       |       |       |       |       |
|---------|------------|-------|-------|-------|-------|-------|-------|-------|-------|-------|-------|-------|-------|-------|-------|-------|-------|-------|-------|------|-------|-------|-------|-------|-------|-------|-------|-------|-------|-------|-------|-------|-------|-------|-------|
| 377-387 | H9         | -4,5  | -16,3 | -4,5  | -14,5 | -4,7  | -15,7 | -4,5  | -16,0 | -4,5  | -15,2 | -6,5  | -16,7 | -4,1  | -14,3 | -3,9  | -12,8 | -3,9  | -11,3 | -5,7 | -14,5 | -4,9  | -12,7 | -4,5  | -13,2 | -3,9  | -13,2 | -4,7  | -14,9 | -3,8  | -12,3 | -5,6  | -13,6 | -3,7  | -9,9  |
| 377-389 | H9         | -3,2  | -15,4 | -2,7  | -12,9 | -4,9  | -15,3 | -3,1  | -13,4 | -3,0  | -13,0 | -5,8  | -15,9 | -4,4  | -14,6 | -3,0  | -12,2 | -4,3  | -13,5 | -4,2 | -14,1 | -3,8  | -13,4 | -3,6  | -12,4 | -3,0  | -12,1 | -2,4  | -12,8 | -2,5  | -12,6 | -5,4  | -13,6 | -4,4  | -11,5 |
| 379-389 | H9         | -4,5  | -10,6 | -4,4  | -12,5 | -3,6  | -10,3 | -4,8  | -12,1 | -3,8  | -12,6 | -5,3  | -16,8 | -3,2  | -8,7  | -4,2  | -11,3 | -3,7  | -7,0  | -5,6 | -11,3 | -5,5  | -7,0  | -4,6  | -11,8 | -3,9  | -10,3 | -4,1  | -12,5 | -3,1  | -9,5  | -4,8  | -13,9 | -1,2  | -5,7  |
| 382-389 | H9         | -5,1  | -14,7 | -4,4  | -13,0 | -3,7  | -12,7 | -8,2  | -14,8 | -7,3  | -14,9 | -4,9  | -11,1 | -2,8  | -10,8 | -7,1  | -12,8 | -2,8  | -9,4  | -5,9 | -13,9 | -5,3  | -9,8  | -8,4  | -15,3 | -4,2  | -11,4 | -8,8  | -15,3 | -7,7  | -12,6 | -3,3  | -8,6  | -2,9  | -6,2  |
| 385-389 | H9         | -1,9  | -11,5 | -8,1  | -13,9 | -8,2  | -16,1 | -6,8  | -15,0 | -4,1  | -13,8 | -10,2 | -11,1 | -9,4  | -13,4 | -4,1  | -11,7 | -6,5  | -7,9  | -2,5 | -10,7 | -3,0  | -8,6  | -10,3 | -15,8 | -6,5  | -16,8 | -6,2  | -15,4 | -5,4  | -14,8 | -7,4  | -3,8  | -9,4  | -11,2 |
| 390-404 | H9-H10     | -8,3  | -13,7 | -7,1  | -15,5 | -5,8  | -9,7  | -7,5  | -14,9 | -7,7  | -16,1 | -9,7  | -14,8 | -5,9  | -9,6  | -7,2  | -14,6 | -5,6  | -11,3 | -8,1 | -14,1 | -9,6  | -10,5 | -6,4  | -14,3 | -7,7  | -16,6 | -6,3  | -15,1 | -5,6  | -13,7 | -8,7  | -12,8 | -5,7  | -8,2  |
| 392-404 | H9-H10     | -7,6  | -11,3 | -7,6  | -14,2 | -6,3  | -8,1  | -8,0  | -13,7 | -8,2  | -15,3 | -12,5 | -16,0 | -6,5  | -8,1  | -7,5  | -13,1 | -5,9  | -10,6 | -7,3 | -11,6 | -10,0 | -7,8  | -6,9  | -13,1 | -8,3  | -15,5 | -7,1  | -13,4 | -6,2  | -12,5 | -13,6 | -14,2 | -6,0  | -7,4  |
| 392-407 | H9-H10     | -6,5  | -17,5 | -5,7  | -18,2 | -7,7  | -16,3 | -7,8  | -17,2 | -8,0  | -16,6 | -11,9 | -20,9 | -7,5  | -15,7 | -4,6  | -13,6 | -6,3  | -14,6 | -7,1 | -14,3 | -9,2  | -13,7 | -7,5  | -16,0 | -6,8  | -16,7 | -6,6  | -14,6 | -5,7  | -16,5 | -10,2 | -18,2 | -6,0  | -15,0 |
| 408-413 | H10/11     | 1,5   | -3,0  | -0,1  | -8,7  | -0,5  | -9,6  | 1,8   | -7,5  | 0,5   | -8,0  | -0,6  | -5,9  | -0,8  | -6,2  | 0,6   | -5,1  | -0,9  | -6,5  | 1,2  | -3,1  | 2,3   | -1,5  | -0,3  | -6,3  | 0,9   | -4,7  | 1,9   | -2,3  | 1,6   | -4,0  | 0,3   | -4,3  | -1,8  | -8,5  |
| 410-414 | H10/11     | 2,6   | -5,4  | 0,7   | -11,7 | -1,4  | -11,6 | 3,7   | -8,0  | 0,0   | -12,1 | -1,5  | -11,6 | -2,4  | -9,6  | 0,1   | -7,1  | -3,9  | -9,7  | 2,2  | -1,3  | 0,5   | -5,5  | 1,3   | -7,2  | 1,3   | -7,6  | -1,8  | -2,4  | 0,4   | -4,9  | -0,4  | -8,2  | -2,3  | -10,1 |
| 412-420 | H10/11     | -19,4 | -6,3  | -25,0 | -20,0 | -18,2 | -9,9  | 22,3  | -12,3 | -22,4 | -13,1 | -25,2 | -16,8 | -23,0 | -12,4 | -16,8 | -6,7  | -15,7 | -10,2 | 2,4  | -4,2  | -16,2 | -3,1  | -19,7 | -8,9  | -20,1 | -11,2 | -23,4 | -12,0 | -20,8 | -10,9 | -16,8 | -12,0 | -13,9 | -9,2  |
| 412-426 | H10/11     | -41,0 | -21,0 | -48,9 | -36,7 | -40,2 | -21,9 | -47,8 | -36,3 | -48,0 | -31,8 | -47,5 | -31,4 | -44,1 | -27,5 | -40,9 | -21,5 | -25,9 | -12,9 | -2,9 | -7,9  | -37,3 | -13,1 | -41,0 | -18,0 | -40,5 | -18,5 | -42,4 | -17,7 | -40,6 | -18,7 | -31,6 | -17,9 | -32,6 | -16,0 |
| 412-427 | H10/11     | -43,9 | -21,7 | -47,5 | -36,5 | -42,2 | -22,5 | -47,7 | -36,7 | -47,3 | -32,6 | -45,7 | -31,0 | -47,1 | -29,2 | -40,7 | -21,5 | -25,6 | -13,7 | -2,3 | -7,1  | -39,8 | -12,2 | -40,3 | -16,7 | -39,1 | -16,9 | -40,3 | -15,5 | -39,8 | -17,9 | -29,5 | -14,5 | -34,2 | -16,2 |
| 415-426 | H10/11     | -60,2 | -29,7 | -58,3 | -42,5 | -54,7 | -28,3 | -58,9 | -45,8 | -58,7 | -40,8 | -58,1 | -35,2 | -59,2 | -36,8 | -51,6 | -30,7 | -35,1 | -16,2 | -9,3 | -12,0 | -54,9 | -18,9 | -51,2 | -24,3 | -49,8 | -23,8 | -51,9 | -20,5 | -50,8 | -24,4 | -38,5 | -17,6 | -46,2 | -20,5 |
| 415-427 | H10/11     | -61,0 | -29,5 | -63,5 | -42,2 | -57,4 | -26,6 | -65,8 | -47,1 | -64,6 | -40,1 | -59,6 | -33,8 | -61,8 | -36,5 | -56,6 | -27,9 | -33,4 | -13,1 | -7,0 | -9,8  | -55,5 | -16,8 | -55,0 | -20,2 | -53,6 | -19,2 | -55,0 | -17,0 | -54,4 | -20,6 | -37,9 | -15,0 | -47,1 | -17,6 |
| 427-439 | H10/11-H12 | -14,7 | -7,2  | -18,4 | -10,2 | -16,2 | -5,8  | -21,1 | -13,1 | -17,6 | -10,2 | -22,9 | -13,0 | -17,1 | -7,0  | -15,4 | -6,9  | -9,6  | -3,1  | -3,0 | -2,8  | -15,2 | -0,6  | -14,8 | -3,7  | -14,8 | -5,4  | -14,9 | -3,0  | -14,5 | -3,2  | -15,2 | -7,6  | -12,9 | -2,1  |
| 427-441 | H10/11-H12 | -25,1 | -9,6  | -30,1 | -17,0 | -26,1 | -6,3  | -35,8 | -22,9 | -32,1 | -16,0 | -32,9 | -17,2 | -28,5 | -12,1 | -27,9 | -10,5 | -14,0 | -4,9  | -3,6 | -4,0  | -26,2 | -3,4  | -24,4 | -3,8  | -23,3 | -6,5  | -25,5 | -1,3  | -23,9 | -3,8  | -23,5 | -12,2 | -16,6 | -3,2  |
| 427-442 | H10/11-H12 | -28,0 | -13,8 | -28,0 | -17,3 | -24,9 | -12,4 | -43,1 | -19,5 | -35,6 | -20,8 | -31,2 | -18,8 | -26,8 | -15,9 | -26,0 | -12,8 | -13,1 | -8,7  | -5,3 | -5,2  | -29,1 | -6,6  | -21,3 | -6,4  | -22,5 | -9,2  | -23,6 | -4,0  | -26,0 | -6,2  | -19,8 | -12,3 | -18,1 | -6,8  |
| 427-443 | H10/11-H12 | -33,5 | -15,9 | -34,6 | -21,9 | -33,7 | -12,4 | -43,2 | -29,0 | -40,0 | -21,7 | -40,4 | -20,5 | -34,9 | -19,4 | -34,7 | -14,1 | -17,3 | -4,6  | -1,6 | -5,1  | -33,2 | -7,6  | -30,9 | -4,6  | -26,4 | -3,7  | -30,9 | -1,6  | -28,5 | -3,7  | -21,1 | -7,7  | -22,2 | -1,3  |
| 428-439 | H10/11-H12 | -13,6 | -6,5  | -17,7 | -10,5 | -14,0 | -3,3  | -20,6 | -13,2 | -17,5 | -10,5 | -18,9 | -10,6 | -14,9 | -4,8  | -15,3 | -6,2  | -8,7  | -1,5  | -1,3 | -1,1  | -14,1 | 0,2   | -14,5 | -2,9  | -14,1 | -4,3  | -15,0 | -1,9  | -14,1 | -2,5  | -12,1 | -4,7  | -10,3 | 0,0   |
| 428-440 | H10/11-H12 | -22,2 | -10,7 | -25,9 | -14,6 | -18,8 | -5,4  | -29,8 | -19,2 | -25,4 | -13,3 | -23,6 | -10,4 | -19,7 | -10,6 | -22,6 | -6,7  | -9,6  | -4,9  | -1,3 | -2,8  | -21,5 | -0,9  | -20,5 | -2,6  | -19,5 | -4,9  | -19,4 | -2,1  | -20,3 | -1,7  | -13,3 | -4,0  | -11,6 | -2,9  |
| 428-441 | H10/11-H12 | -26,9 | -9,4  | -31,1 | -18,3 | -27,0 | -6,7  | -38,3 | -27,1 | -35,2 | -19,5 | -33,0 | -15,6 | -30,0 | -13,5 | -30,6 | -12,5 | -15,7 | -4,4  | -2,1 | -2,7  | -27,5 | -3,0  | -26,1 | -3,3  | -24,3 | -6,9  | -28,4 | -4,2  | -25,8 | -5,3  | -18,7 | -7,3  | -19,7 | -2,9  |
| 440-447 | H12        | -36,9 | -17,7 | -47,0 | -29,4 | -41,7 | -19,8 | -49,2 | -34,2 | -45,5 | -28,6 | -42,4 | -23,6 | -40,9 | -23,1 | -40,9 | -20,6 | -27,4 | -7,9  | -5,3 | -3,1  | -38,9 | -10,2 | -40,5 | -13,5 | -38,9 | -12,9 | -40,1 | -10,5 | -39,7 | -12,6 | -25,7 | -8,8  | -32,3 | -6,6  |
| 441-446 | H12        | -38,5 | -25,7 | -37,0 | -19,7 | -38,7 | -9,2  | -36,4 | -26,6 | -39,1 | -23,6 | -34,7 | -18,9 | -35,7 | -13,5 | -35,0 | -16,9 | -15,6 | -0,5  | -8,4 | -8,5  | -38,5 | -16,4 | -35,3 | -11,4 | -29,5 | -7,2  | -31,6 | -9,1  | -34,1 | -6,9  | -23,7 | -8,6  | -24,2 | 0,1   |

LXRß

|         |                |       |       |       |       |       |       |       |       |       |       |       |       |       |       |       |       |       |       |       |       |       |       |       |       |       |       |       |       |       |       |       |       |       |       |
|---------|----------------|-------|-------|-------|-------|-------|-------|-------|-------|-------|-------|-------|-------|-------|-------|-------|-------|-------|-------|-------|-------|-------|-------|-------|-------|-------|-------|-------|-------|-------|-------|-------|-------|-------|-------|
| 218-226 | H1             | -3,4  | -12,4 | -6,0  | -9,1  | -11,7 | -10,4 | -17,2 | -9,2  | -18,5 | -13,9 | -3,4  | -17,1 | -10,2 | -10,1 | -16,5 | -16,5 | -10,4 | -8,9  | -3,9  | -13,7 | -3,7  | -12,6 | -2,5  | -13,0 | -14,7 | -13,6 | -13,9 | -9,3  | -15,2 | -13,1 | -5,4  | -13,6 | -9,0  | -10,0 |
| 226-230 | H1             | -0,1  | -8,4  | -5,1  | -18,5 | -2,3  | -11,3 | -1,3  | -14,2 | -2,5  | -21,4 | 2,5   | -6,3  | -1,5  | -8,7  | -2,7  | -24,0 | -1,4  | -11,5 | 0,1   | -11,6 | -1,0  | -5,8  | -1,4  | -9,2  | -2,1  | -17,1 | -3,1  | -8,0  | -4,3  | -19,5 | 3,2   | -11,6 | -1,0  | -11,3 |
| 226-231 | H1             | -1,8  | -8,5  | -1,8  | -13,1 | -2,4  | -8,5  | -0,9  | -10,9 | -1,3  | -17,4 | -1,3  | -10,4 | -1,3  | -8,6  | -2,5  | -16,1 | -2,3  | -9,1  | -1,6  | -10,1 | -1,3  | -8,2  | -1,0  | -8,0  | -1,0  | -11,6 | -0,5  | -6,5  | -1,1  | -14,8 | -1,1  | -12,4 | -1,2  | -7,6  |
| 226-233 | H1             | -1,8  | -11,6 | -1,8  | -14,2 | -1,9  | -10,2 | -1,1  | -12,0 | -1,8  | -17,0 | -1,8  | -13,3 | -0,7  | -11,1 | -1,5  | -16,2 | -1,6  | -11,2 | -2,1  | -12,6 | -1,7  | -10,7 | -1,7  | -11,1 | -1,2  | -11,9 | -1,1  | -7,6  | -1,8  | -14,3 | -2,0  | -15,0 | -1,2  | -9,9  |
| 227-233 | H1             | -1,8  | -10,2 | -1,0  | -13,0 | -1,1  | -10,9 | 1,8   | -7,1  | 0,9   | -11,9 | -1,6  | -11,2 | -0,7  | -11,0 | 0,2   | -10,5 | -0,8  | -10,8 | -2,0  | -11,4 | -1,6  | -10,0 | -1,6  | -10,2 | -0,2  | -9,1  | -0,4  | -5,3  | -0,3  | -7,9  | -1,3  | -11,5 | -0,7  | -10,7 |
| 228-233 | H1             | -2,4  | -14,8 | -0,5  | -13,8 | -1,5  | -10,5 | 0,4   | -11,5 | -0,7  | -13,7 | -2,1  | -15,6 | -0,6  | -11,5 | -0,3  | -14,0 | -0,8  | -11,0 | -3,1  | -16,7 | -2,3  | -13,9 | -3,1  | -14,2 | -0,8  | -10,9 | 0,1   | -10,7 | -0,7  | -11,9 | -2,6  | -15,9 | -0,9  | -11,5 |
| 234-238 | H1             | -4,6  | -23,8 | -4,0  | -25,4 | -1,1  | -12,2 | -5,0  | -16,1 | -7,1  | -23,5 | -4,0  | -27,0 | -3,6  | -11,2 | -5,8  | -23,5 | -5,1  | -6,2  | -5,9  | -26,7 | -9,2  | -23,2 | -3,6  | -23,6 | -2,1  | -10,0 | -2,6  | -15,6 | -3,5  | -15,7 | -6,5  | -29,4 | -9,7  | -28,9 |
| 274-279 | H3             | -25,5 | -87,7 | -18,4 | -80,4 | -30,1 | -79,2 | -18,6 | -80,2 | -19,6 | -81,1 | -25,3 | -87,2 | -30,7 | -79,8 | -19,5 | -80,4 | -30,3 | -80,2 | -25,7 | -89,1 | -25,0 | -87,3 | -25,3 | -87,2 | -17,7 | -79,6 | -17,6 | -77,5 | -18,4 | -77,1 | -24,9 | -85,7 | -30,0 | -76,2 |
| 274-281 | H3             | -31,8 | -85,0 | -20,6 | -76,6 | -29,4 | -72,6 | -21,2 | -76,7 | -21,3 | -77,8 | -31,2 | -84,8 | -29,1 | -72,0 | -21,9 | -77,7 | -29,3 | -72,5 | -32,1 | -86,2 | -31,2 | -84,6 | -31,8 | -84,7 | -19,9 | -75,9 | -19,8 | -75,1 | -21,0 | -75,8 | -31,1 | -83,6 | -28,9 | -69,4 |
| 275-281 | H3             | -30,9 | -80,3 | -20,1 | -70,7 | -30,0 | -74,0 | -20,0 | -70,6 | -20,5 | -71,4 | -30,5 | -80,7 | -29,6 | -73,5 | -20,3 | -70,5 | -29,9 | -73,7 | -30,8 | -81,0 | -30,6 | -79,8 | -30,5 | -80,2 | -19,1 | -69,7 | -19,1 | -66,6 | -19,4 | -67,1 | -30,4 | -79,1 | -28,9 | -70,0 |
| 281-285 | H3             | -1,0  | -0,1  | -2,5  | -6,7  | -1,1  | -2,8  | -1,1  | -6,3  | -2,3  | -7,6  | 0,4   | -1,6  | -0,2  | -2,6  | -1,2  | -8,7  | 0,2   | -1,8  | -0,6  | -4,7  | 3,9   | -4,3  | 1,5   | -1,7  | -0,2  | -4,6  | -2,3  | -6,7  | -3,2  | -5,7  | 2,3   | -0,8  | -0,4  | -4,4  |
| 285-292 | H3, loop H3-H4 | 0,5   | -2,8  | -0,2  | -2,7  | -0,3  | -2,9  | 0,0   | -2,1  | -0,6  | -2,7  | 0,0   | -2,8  | 0,1   | -3,0  | -0,2  | -2,8  | 0,2   | -2,6  | 0,8   | -2,0  | 0,0   | -2,9  | 0,3   | -2,5  | -0,2  | -2,5  | -0,2  | -2,1  | -0,1  | -2,3  | 0,1   | -3,3  | 0,3   | -2,7  |
| 286-292 | H3, loop H3-H4 | 1,9   | -0,9  | 1,2   | -1,6  | 1,2   | -1,3  | 1,5   | -0,6  | 1,0   | -0,3  | 1,1   | -1,2  | 2,2   | -0,7  | 1,3   | -0,8  | 1,6   | -0,7  | 0,7   | -1,8  | 1,3   | -1,3  | 1,3   | -1,0  | 1,6   | -0,4  | 1,2   | -0,9  | 1,6   | -0,7  | 1,4   | -1,6  | 1,8   | -1,4  |
| 286-295 | H3, loop H3-H4 | -6,7  | -7,3  | -5,6  | -5,6  | -3,8  | -3,8  | -5,8  | -5,2  | -6,9  | -5,6  | -5,5  | -6,1  | -3,0  | -3,6  | -6,4  | -5,4  | -4,2  | -3,5  | -6,7  | -7,4  | -6,4  | -7,3  | -6,1  | -6,3  | -6,4  | -6,0  | -4,9  | -5,2  | -6,1  | -5,3  | -6,2  | -7,3  | -3,2  | -3,8  |
| 290-295 | H3, loop H3-H4 | 0,3   | -9,4  | -0,2  | 5,0   | -3,4  | 2,8   | -4,9  | 1,0   | -10,8 | -0,6  | 2,2   | -8,7  | -2,9  | 3,1   | -9,9  | -5,0  | -3,5  | 2,1   | 0,2   | -9,6  | -2,7  | -10,3 | -1,6  | -7,9  | -1,3  | 3,2   | -0,5  | 2,4   | -7,5  |       |       |       |       |       |



|         |            |       |       |       |       |       |       |       |       |       |       |       |       |       |       |       |       |       |       |       |       |       |       |       |       |       |       |       |       |       |       |       |       |       |       |       |
|---------|------------|-------|-------|-------|-------|-------|-------|-------|-------|-------|-------|-------|-------|-------|-------|-------|-------|-------|-------|-------|-------|-------|-------|-------|-------|-------|-------|-------|-------|-------|-------|-------|-------|-------|-------|-------|
| 380-401 | H8-H9      | -10,1 | -15,5 | -6,0  | -12,1 | -6,2  | -9,1  | -6,9  | -13,5 | -7,0  | -13,5 | -8,5  | -14,4 | -5,8  | -9,0  | -6,5  | -13,6 | -5,3  | -8,6  | -10,1 | -12,8 | -9,9  | -15,1 | -9,2  | -14,6 | -7,3  | -13,2 | -7,1  | -13,6 | -6,7  | -11,7 | -8,9  | -16,0 | -6,2  | -11,6 |       |
| 380-403 | H8-H9      | -10,2 | -15,5 | -5,8  | -10,6 | -4,7  | -7,6  | -6,3  | -11,4 | -6,2  | -11,4 | -8,8  | -14,0 | -4,3  | -7,5  | -6,2  | -11,4 | -4,1  | -6,9  | -9,7  | -12,8 | -9,7  | -14,8 | -9,3  | -14,4 | -6,6  | -11,0 | -6,4  | -11,5 | -6,1  | -9,8  | -8,8  | -15,0 | -4,9  | -9,6  |       |
| 389-394 | H9         | -12,8 | -14,9 | -3,7  | -6,5  | -6,0  | -4,3  | -7,3  | -6,6  | -7,6  | -7,6  | -8,7  | -10,4 | -4,7  | -3,9  | -7,8  | -11,7 | -1,5  | -2,6  | -10,9 | -16,7 | -12,7 | -14,3 | -13,4 | -11,9 | -5,3  | -2,1  | -5,4  | -7,3  | -5,8  | -5,9  | -10,4 | -13,0 | -4,3  | -5,0  |       |
| 393-403 | H9         | 1,5   | -0,5  | 2,6   | 1,9   | -0,6  | -0,2  | 1,6   | -0,3  | -0,3  | -0,7  | 1,0   | -0,5  | -1,2  | -0,5  | -0,1  | 0,0   | 0,6   | 0,1   | 0,4   | -0,9  | 1,3   | -1,5  | 2,1   | 0,2   | 2,3   | 1,9   | 1,8   | 1,7   | 0,5   | 0,3   | -0,2  | -1,3  | 0,3   | -0,3  |       |
| 395-401 | H9         | -1,3  | -2,9  | -1,3  | -3,1  | -0,6  | -1,2  | 0,2   | -1,6  | -1,2  | -2,1  | -1,3  | -4,6  | -1,0  | -2,1  | -1,7  | -3,3  | -0,1  | -1,5  | -1,8  | -3,4  | -0,1  | -2,8  | -0,2  | -3,9  | -0,7  | -2,4  | -0,6  | -2,2  | -0,5  | -1,1  | -1,4  | -3,7  | -1,0  | -3,0  |       |
| 395-403 | H9         | -1,2  | -3,4  | -0,3  | -3,0  | -0,8  | -3,3  | -0,4  | -2,5  | -0,2  | -3,1  | -1,8  | -3,6  | 0,5   | -2,5  | -0,5  | -2,4  | 0,1   | -3,0  | -1,9  | -3,3  | -1,6  | -3,9  | -2,0  | -4,1  | 0,0   | -2,7  | -0,5  | -2,8  | -0,5  | -1,7  | -1,7  | -3,7  | 0,2   | -2,8  |       |
| 404-418 | H9-H10     | -6,0  | -7,3  | -6,4  | -3,6  | -6,6  | -4,5  | -7,3  | -2,5  | -9,3  | -3,3  | -6,3  | -6,3  | -4,0  | -3,3  | -7,6  | -4,0  | -5,0  | -3,8  | -5,4  | -7,3  | -6,5  | -7,1  | -5,3  | -5,9  | -6,1  | -3,1  | -5,6  | -2,1  | -5,5  | -2,9  | -5,4  | -8,0  | -1,8  | -4,3  |       |
| 405-418 | H9-H10     | -9,6  | -11,0 | -5,4  | -6,7  | -9,2  | -6,7  | -7,4  | -5,9  | -10,9 | -8,1  | -10,0 | -9,2  | -6,6  | -5,4  | -7,9  | -8,7  | -7,6  | -5,5  | -8,9  | -10,6 | -10,4 | -10,9 | -9,1  | -9,3  | -5,5  | -6,6  | -5,8  | -5,4  | -6,8  | -9,3  | -9,7  | -11,3 | -5,0  | -5,9  |       |
| 406-418 | H9-H10     | -6,0  | -5,8  | -5,5  | 1,5   | -7,4  | -5,8  | -6,8  | 3,0   | -8,0  | 4,4   | -6,3  | -6,7  | -3,7  | -4,6  | -8,6  | 2,3   | -5,3  | -3,6  | -8,0  | -5,6  | -6,0  | -3,8  | -5,2  | -5,2  | -6,3  | 3,7   | -5,2  | 4,0   | -4,3  | 2,4   | -7,7  | -8,6  | -2,5  | -5,5  |       |
| 406-421 | H9-H10     | -9,5  | -16,2 | -9,9  | -15,0 | -8,8  | -10,0 | -10,5 | -11,9 | -12,3 | -12,6 | -10,3 | -15,6 | -6,4  | -10,0 | -11,4 | -13,5 | -7,2  | -9,6  | -8,8  | -9,8  | -9,8  | -16,3 | -9,2  | -15,3 | -9,9  | -13,0 | -9,3  | -12,2 | -8,9  | -11,4 | -9,0  | -17,3 | -4,2  | -10,8 |       |
| 407-421 | H9-H10     | -9,8  | -15,1 | -11,5 | -16,6 | -8,7  | -11,1 | -12,0 | -14,0 | -12,0 | -13,7 | -9,5  | -16,9 | -6,1  | -10,4 | -11,8 | -15,6 | -6,2  | -9,6  | -8,5  | -10,9 | -9,1  | -17,2 | -9,2  | -16,0 | -10,7 | -14,9 | -10,2 | -14,1 | -9,1  | -13,1 | -8,7  | -18,4 | -3,0  | -10,7 |       |
| 423-428 | H10/11     | -4,0  | -4,6  | -4,6  | -10,4 | -5,3  | -5,8  | -4,3  | -6,2  | -6,9  | -11,3 | -2,8  | -5,7  | -2,5  | 0,9   | -4,8  | -13,5 | -3,0  | -2,9  | 0,0   | -1,4  | -2,7  | -6,0  | -3,1  | -7,7  | 0,1   | -2,1  | -2,5  | -9,2  | -2,0  | -10,2 | -2,3  | -4,9  | -3,1  | -4,7  |       |
| 424-428 | H10/11     | -7,2  | -10,0 | -5,8  | -15,7 | -9,1  | -10,4 | -5,5  | -11,6 | -8,8  | -17,0 | -4,6  | -12,1 | -3,6  | -5,8  | -6,7  | -19,8 | -5,3  | -7,5  | -0,7  | -1,5  | -5,9  | -11,3 | -5,8  | -12,2 | -1,3  | -7,7  | -4,6  | -12,3 | -5,2  | -13,2 | -5,2  | -11,2 | -5,0  | -8,2  |       |
| 426-434 | H10/11     | -36,3 | -43,5 | -33,6 | -37,0 | -30,8 | -23,3 | -31,1 | -30,5 | -35,8 | -34,8 | -36,0 | -40,3 | -33,2 | -32,3 | -30,6 | -32,5 | -29,2 | -21,8 | -14,1 | -15,4 | -37,4 | -38,9 | -36,2 | -38,9 | -31,2 | -31,7 | -32,2 | -30,6 | -30,1 | -31,0 | -33,5 | -35,6 | -31,9 | -30,6 |       |
| 426-440 | H10/11     | -62,5 | -59,0 | -57,3 | -53,7 | -56,9 | -37,6 | -55,9 | -49,3 | -57,3 | -52,6 | -62,7 | -55,5 | -59,9 | -50,8 | -54,6 | -48,1 | -47,1 | -21,7 | -23,7 | -22,6 | -62,5 | -53,4 | -61,8 | -49,8 | -54,8 | -46,6 | -54,4 | -36,5 | -54,1 | -42,6 | -58,8 | -49,0 | -56,2 | -38,3 |       |
| 426-441 | H10/11     | -64,7 | -58,4 | -59,4 | -53,9 | -58,6 | -34,8 | -58,1 | -48,5 | -59,1 | -52,8 | -64,0 | -52,5 | -62,2 | -50,6 | -56,8 | -47,2 | -47,3 | -18,8 | -19,5 | -18,0 | -64,5 | -51,2 | -63,7 | -46,6 | -56,6 | -46,0 | -55,0 | -32,4 | -56,1 | -41,7 | -60,3 | -47,1 | -57,9 | -35,9 |       |
| 428-440 | H10/11     | -74,9 | -64,5 | -65,2 | -56,4 | -65,9 | -41,8 | -65,6 | -52,7 | -66,8 | -57,2 | -74,5 | -60,6 | -68,8 | -55,2 | -65,2 | -51,8 | -54,0 | -24,3 | -29,8 | -30,7 | -74,6 | -57,5 | -73,6 | -53,3 | -63,3 | -49,9 | -62,6 | -37,2 | -63,9 | -44,3 | -72,1 | -52,3 | -64,9 | -41,3 |       |
| 429-440 | H10/11     | -76,0 | -67,5 | -69,1 | -60,0 | -70,8 | -46,1 | -68,1 | -56,1 | -69,3 | -60,1 | -75,7 | -61,7 | -75,6 | -61,9 | -67,4 | -69,4 | -54,7 | -58,3 | -22,1 | -26,9 | -25,4 | -75,5 | -59,7 | -74,0 | -54,1 | -68,1 | -52,7 | -65,2 | -37,1 | -66,3 | -46,0 | -72,4 | -53,8 | -71,0 | -43,0 |
| 429-441 | H10/11     | -76,7 | -66,8 | -70,2 | -58,9 | -72,3 | -40,9 | -69,7 | -54,3 | -70,9 | -59,4 | -76,1 | -58,9 | -77,1 | -59,6 | -69,5 | -52,7 | -58,4 | -18,0 | -22,7 | -22,4 | -76,0 | -56,6 | -74,5 | -50,6 | -69,0 | -50,3 | -65,1 | -32,1 | -68,1 | -44,9 | -72,9 | -52,1 | -72,5 | -39,5 |       |
| 441-453 | H10/11-H12 | -28,0 | -19,7 | -17,0 | -11,6 | -16,8 | -9,6  | -17,6 | -11,9 | -19,5 | -12,0 | -27,1 | -16,8 | -20,5 | -11,5 | -17,9 | -10,9 | -15,5 | -3,9  | -12,6 | -11,4 | -28,0 | -19,4 | -23,6 | -16,4 | -17,1 | -9,1  | -15,3 | -3,9  | -17,0 | -6,7  | -25,3 | -17,7 | -18,0 | -6,8  |       |
| 441-456 | H10/11-H12 | -50,0 | -30,8 | -46,2 | -38,4 | -41,9 | -24,8 | -47,5 | -40,4 | -46,2 | -34,6 | -52,2 | -27,5 | -42,9 | -26,3 | -45,7 | -33,9 | -35,0 | -9,0  | -16,8 | -12,4 | -50,3 | -31,7 | -47,5 | -26,5 | -46,9 | -34,8 | -42,7 | -30,6 | -45,2 | -30,9 | -47,7 | -26,6 | -40,9 | -14,0 |       |
| 441-457 | H10/11-H12 | -55,0 | -32,7 | -42,5 | -23,8 | -37,5 | -26,7 | -44,9 | -28,2 | -46,1 | -30,2 | -53,6 | -29,3 | -37,8 | -25,1 | -45,1 | -29,4 | -28,1 | -3,6  | -12,2 | -9,8  | -56,1 | -36,5 | -52,1 | -29,4 | -42,2 | -21,4 | -38,9 | -5,9  | -43,6 | -15,8 | -51,7 | -30,6 | -31,9 | -11,5 |       |
| 442-453 | H10/11-H12 | -24,9 | -16,0 | -16,8 | -11,3 | -16,9 | -8,0  | -18,1 | -11,6 | -19,6 | -11,7 | -23,7 | -14,0 | -18,4 | -9,7  | -18,2 | -10,6 | -15,5 | -0,9  | -8,7  | -7,6  | -24,9 | -15,8 | -21,5 | -13,4 | -17,2 | -7,8  | -15,7 | -2,3  | -17,1 | -5,6  | -22,8 | -14,5 | -16,9 | -4,8  |       |
| 442-456 | H10/11-H12 | -52,4 | -31,9 | -44,6 | -25,8 | -37,6 | -23,9 | -48,2 | -30,7 | -50,6 | -32,5 | -52,0 | -29,4 | -35,7 | -21,4 | -49,6 | -29,9 | -25,9 | -1,7  | -12,5 | -9,9  | -53,6 | -34,3 | -50,9 | -28,1 | -46,8 | -24,8 | -44,5 | -8,6  | -44,6 | -16,4 | -50,7 | -28,6 | -29,1 | -7,8  |       |
| 454-461 | H12        | -49,7 | -32,9 | -47,3 | -27,8 | -49,0 | -31,3 | -46,8 | -31,9 | -46,5 | -32,0 | -50,7 | -32,1 | -47,9 | -30,0 | -45,5 | -31,3 | -41,3 | -9,5  | -15,5 | -10,7 | -52,3 | -36,0 | -50,6 | -31,8 | -48,2 | -30,9 | -44,4 | -16,4 | -46,4 | -24,0 | -47,9 | -31,8 | -45,9 | -18,7 |       |

**Supplementary Table 5: Peptides with highest contribution to the discrimination between lipogenic and non-lipogenic compounds.**

*Related to Figure 3*

| Peptide                                           | LXR isoform & Labelling Time | Amino Acid Sequence      | Secondary Structure | OPLS-DA  |          | Lipogenic (n = 5) vs non-lipogenic (n = 7): unpaired t-test |                 |                |
|---------------------------------------------------|------------------------------|--------------------------|---------------------|----------|----------|-------------------------------------------------------------|-----------------|----------------|
|                                                   |                              |                          |                     | p        | p(corr)  | P-value                                                     | P-value summary | t, df*         |
| <b>TG OPLS-DA: LXRα/SRC1 and LXRβ/SRC1 HDX-MS</b> |                              |                          |                     |          |          |                                                             |                 |                |
| 239-257                                           | LXRα/SRC1/30 sec             | RVTPWPMAPDPHSREARQQRFAHF | loop H1-H3, H3      | 0,056996 | 0,740641 | 0,0061                                                      | **              | t=3,265, df=13 |
| 319-331                                           | LXRα/SRC1/30 sec             | FSYNREDFAKAGL            | βsheets-H6          | 0,076847 | 0,822716 | 0,0017                                                      | **              | t=3,945, df=13 |
| 326-331                                           | LXRα/SRC1/30 sec             | FAKAGL                   | H6                  | 0,142916 | 0,711162 | 0,0089                                                      | **              | t=3,072, df=13 |
| 327-331                                           | LXRα/SRC1/30 sec             | AKAGL                    | H6                  | 0,131653 | 0,742891 | 0,0037                                                      | **              | t=3,523, df=13 |
| 427-442                                           | LXRα/SRC1/30 sec             | ALRLQDKKLPPLLSEI         | H10/11-H12          | 0,101271 | 0,702581 | 0,0153                                                      | *               | t=2,790, df=13 |
| 427-443                                           | LXRα/SRC1/30 sec             | ALRLQDKKLPPLLSEIW        | H10/11-H12          | 0,117756 | 0,698298 | 0,0094                                                      | **              | t=3,046, df=13 |
| 260-265                                           | LXRα/SRC1/600 sec            | LAIVSV                   | H3                  | 0,135231 | 0,801881 | 0,003                                                       | **              | t=3,635, df=13 |
| 261-267                                           | LXRα/SRC1/600 sec            | AIVSVQE                  | H3                  | 0,117213 | 0,800223 | 0,0027                                                      | **              | t=3,687, df=13 |
| 321-326                                           | LXRα/SRC1/600 sec            | YNREDF                   | βsheets-H6          | 0,069397 | 0,787831 | 0,0016                                                      | **              | t=3,983, df=13 |
| 319-331                                           | LXRα/SRC1/600 sec            | FSYNREDFAKAGL            | βsheets-H6          | 0,154177 | 0,911449 | <0,0001                                                     | ****            | t=6,064, df=13 |
| 320-331                                           | LXRα/SRC1/600 sec            | SYNREDFAKAGL             | βsheets-H6          | 0,176587 | 0,889276 | 0,0001                                                      | ***             | t=5,497, df=13 |
| 321-331                                           | LXRα/SRC1/600 sec            | YNREDFAKAGL              | βsheets-H6          | 0,1991   | 0,9126   | <0,0001                                                     | ****            | t=6,465, df=13 |
| 327-331                                           | LXRα/SRC1/600 sec            | AKAGL                    | H6                  | 0,224377 | 0,824784 | 0,0004                                                      | ***             | t=4,771, df=13 |
| 334-340                                           | LXRα/SRC1/600 sec            | EFINPIF                  | H7                  | 0,183499 | 0,757711 | 0,0018                                                      | **              | t=3,898, df=13 |
| 334-341                                           | LXRα/SRC1/600 sec            | EFINPIFE                 | H7                  | 0,094322 | 0,77736  | 0,0027                                                      | **              | t=3,692, df=13 |
| 335-340                                           | LXRα/SRC1/600 sec            | FINPIF                   | H7                  | 0,066668 | 0,76997  | 0,0034                                                      | **              | t=3,568, df=13 |
| 335-341                                           | LXRα/SRC1/600 sec            | FINPIFE                  | H7                  | 0,079184 | 0,900451 | <0,0001                                                     | ****            | t=6,845, df=13 |
| 336-341                                           | LXRα/SRC1/600 sec            | INPIFE                   | H7                  | 0,077918 | 0,845374 | 0,0002                                                      | ***             | t=5,033, df=13 |
| 412-426                                           | LXRα/SRC1/600 sec            | VSLRTLSSVHSEQVF          | H10/11              | 0,119165 | 0,831866 | 0,0005                                                      | ***             | t=4,640, df=13 |
| 412-427                                           | LXRα/SRC1/600 sec            | VSLRTLSSVHSEQVFA         | H10/11              | 0,131013 | 0,866482 | 0,0001                                                      | ***             | t=5,328, df=13 |
| 414-426                                           | LXRα/SRC1/600 sec            | LRTLSSVHSEQVF            | H10/11              | 0,144189 | 0,872449 | 0,0001                                                      | ***             | t=5,511, df=13 |
| 415-426                                           | LXRα/SRC1/600 sec            | RTLSSVHSEQVF             | H10/11              | 0,167289 | 0,895212 | <0,0001                                                     | ****            | t=6,025, df=13 |
| 415-427                                           | LXRα/SRC1/600 sec            | RTLSSVHSEQVFA            | H10/11              | 0,052973 | 0,837297 | 0,0002                                                      | ***             | t=5,080, df=13 |
| 427-439                                           | LXRα/SRC1/600 sec            | ALRLQDKKLPPLL            | H10/11-H12          | 0,092414 | 0,866215 | 0,0004                                                      | ***             | t=4,788, df=13 |
| 428-439                                           | LXRα/SRC1/600 sec            | LRLQDKKLPPLL             | H10/11-H12          | 0,087049 | 0,930961 | <0,0001                                                     | ****            | t=7,148, df=13 |
| 427-441                                           | LXRα/SRC1/600 sec            | ALRLQDKKLPPLLSE          | H10/11-H12          | 0,13526  | 0,94579  | <0,0001                                                     | ****            | t=7,141, df=13 |
| 428-440                                           | LXRα/SRC1/600 sec            | LRLQDKKLPPLLS            | H10/11-H12          | 0,056373 | 0,824116 | 0,0007                                                      | ***             | t=4,416, df=13 |
| 427-442                                           | LXRα/SRC1/600 sec            | ALRLQDKKLPPLLSEI         | H10/11-H12          | 0,076216 | 0,840913 | 0,0003                                                      | ***             | t=4,839, df=13 |
| 428-441                                           | LXRα/SRC1/600 sec            | LRLQDKKLPPLLSE           | H10/11-H12          | 0,102263 | 0,841338 | 0,0006                                                      | ***             | t=4,474, df=13 |
| 427-443                                           | LXRα/SRC1/600 sec            | ALRLQDKKLPPLLSEIW        | H10/11-H12          | 0,13172  | 0,903497 | <0,0001                                                     | ****            | t=5,843, df=13 |
| 440-447                                           | LXRα/SRC1/600 sec            | SEIWDVHE                 | H12                 | 0,098766 | 0,7811   | 0,0024                                                      | **              | t=3,750, df=13 |

Significance selection criteria included correlation coefficients ( $|p(\text{corr})| > 0.7$ ) and the coefficients of contribution to the model separation between TG classes ( $p > 0.05$ ).

\* t: t-values, df: degrees of freedom

**Supplementary Table 6: Peptides with highest contribution to the discrimination between compounds inducing high and low levels of the intestine *Abca1* . Related to Figure 4**

Significance selection criteria included correlation coefficients ( $|p(\text{corr})| > 0.7$ ) and the coefficients of contribution to the model separation between ABCA1 classes ( $p > 0.05$ ).

| Peptide                                                                       | LXR isoform & Labelling Time | Amino Acid Sequence | Secondary Structure | OPLS-DA  |          | High ABCA1 (n = 12) vs low ABCA1 (n = 4): unpaired t-test |                 |                |
|-------------------------------------------------------------------------------|------------------------------|---------------------|---------------------|----------|----------|-----------------------------------------------------------|-----------------|----------------|
|                                                                               |                              |                     |                     | p        | p(corr)  | P-value                                                   | P-value summary | t, df*         |
| <b>ABCA1 OPLS-DA: LXR<math>\alpha</math> and LXR<math>\beta</math> HDX-MS</b> |                              |                     |                     |          |          |                                                           |                 |                |
| 260-265                                                                       | LXR $\alpha$ /30 sec         | LAIVSV              | H3                  | 0,150564 | 0,894756 | <0,0001                                                   | ****            | t=6,545, df=14 |
| 261-267                                                                       | LXR $\alpha$ /30 sec         | AIVSVQE             | H3                  | 0,137346 | 0,904123 | <0,0001                                                   | ****            | t=5,645, df=14 |
| 264-269                                                                       | LXR $\alpha$ /30 sec         | SVQEIV              | H3                  | 0,161037 | 0,927907 | <0,0001                                                   | ****            | t=6,163, df=14 |
| 270-275                                                                       | LXR $\alpha$ /30 sec         | DFAKQL              | H3                  | 0,096683 | 0,744891 | 0,0003                                                    | ***             | t=4,766, df=14 |
| 312-316                                                                       | LXR $\alpha$ /30 sec         | SITFL               | $\beta$ sheets      | 0,138416 | 0,80345  | 0,0002                                                    | ***             | t=5,049, df=14 |
| 319-324                                                                       | LXR $\alpha$ /30 sec         | FSYNRE              | $\beta$ sheets-H6   | 0,088788 | 0,781694 | 0,0006                                                    | ***             | t=4,444, df=14 |
| 319-326                                                                       | LXR $\alpha$ /30 sec         | FSYNREDF            | $\beta$ sheets-H6   | 0,085006 | 0,724336 | 0,0028                                                    | **              | t=3,611, df=14 |
| 320-326                                                                       | LXR $\alpha$ /30 sec         | SYNREDF             | $\beta$ sheets-H6   | 0,09595  | 0,735341 | 0,0014                                                    | **              | t=3,970, df=14 |
| 319-331                                                                       | LXR $\alpha$ /30 sec         | FSYNREDFAKAGL       | $\beta$ sheets-H6   | 0,108478 | 0,700074 | 0,0027                                                    | **              | t=3,629, df=14 |
| 320-331                                                                       | LXR $\alpha$ /30 sec         | SYNREDFAKAGL        | $\beta$ sheets-H6   | 0,118371 | 0,778358 | 0,0003                                                    | ***             | t=4,852, df=14 |
| 260-265                                                                       | LXR $\alpha$ /600 sec        | LAIVSV              | H3                  | 0,275759 | 0,87557  | 0,0008                                                    | ***             | t=4,267, df=14 |
| 261-267                                                                       | LXR $\alpha$ /600 sec        | AIVSVQE             | H3                  | 0,215162 | 0,89756  | 0,0004                                                    | ***             | t=4,624, df=14 |
| 264-269                                                                       | LXR $\alpha$ /600 sec        | SVQEIV              | H3                  | 0,205503 | 0,861406 | 0,001                                                     | **              | t=4,124, df=14 |
| 270-275                                                                       | LXR $\alpha$ /600 sec        | DFAKQL              | H3                  | 0,080182 | 0,718343 | 0,0027                                                    | **              | t=3,636, df=14 |
| 290-296                                                                       | LXR $\alpha$ /600 sec        | LK TSAIE            | H5                  | 0,099353 | 0,737769 | 0,0004                                                    | ***             | t=4,563, df=14 |
| 299-311                                                                       | LXR $\alpha$ /600 sec        | LLETSTRYRNP GSE     | H5- $\beta$ sheets  | 0,074506 | 0,728003 | 0,0012                                                    | **              | t=4,039, df=14 |
| 299-312                                                                       | LXR $\alpha$ /600 sec        | LLETSTRYRNP GSES    | H5- $\beta$ sheets  | 0,074421 | 0,699539 | 0,004                                                     | **              | t=3,432, df=14 |
| 300-311                                                                       | LXR $\alpha$ /600 sec        | LETSTRYRNP GSE      | H5- $\beta$ sheets  | 0,074396 | 0,750937 | 0,0006                                                    | ***             | t=4,389, df=14 |
| 300-312                                                                       | LXR $\alpha$ /600 sec        | LETSTRYRNP GSES     | H5- $\beta$ sheets  | 0,092217 | 0,806184 | 0,0004                                                    | ***             | t=4,671, df=14 |
| 299-314                                                                       | LXR $\alpha$ /600 sec        | LLETSTRYRNP GSESIT  | H5- $\beta$ sheets  | 0,095125 | 0,798007 | 0,0014                                                    | **              | t=3,964, df=14 |
| 299-315                                                                       | LXR $\alpha$ /600 sec        | LLETSTRYRNP GSESITF | H5- $\beta$ sheets  | 0,098119 | 0,791755 | 0,0022                                                    | **              | t=3,738, df=14 |
| 300-315                                                                       | LXR $\alpha$ /600 sec        | LETSTRYRNP GSESITF  | H5- $\beta$ sheets  | 0,102035 | 0,796625 | 0,0018                                                    | **              | t=3,851, df=14 |
| 316-326                                                                       | LXR $\alpha$ /600 sec        | LKDFSYNREDF         | $\beta$ sheets-H6   | 0,07239  | 0,784793 | 0,0058                                                    | **              | t=3,250, df=14 |
| 319-324                                                                       | LXR $\alpha$ /600 sec        | FSYNRE              | $\beta$ sheets-H6   | 0,078487 | 0,731671 | 0,0232                                                    | *               | t=2,549, df=14 |
| 319-326                                                                       | LXR $\alpha$ /600 sec        | FSYNREDF            | $\beta$ sheets-H6   | 0,107692 | 0,860933 | 0,0011                                                    | **              | t=4,087, df=14 |
| 320-326                                                                       | LXR $\alpha$ /600 sec        | SYNREDF             | $\beta$ sheets-H6   | 0,112167 | 0,846516 | 0,0024                                                    | **              | t=3,685, df=14 |
| 321-326                                                                       | LXR $\alpha$ /600 sec        | YNREDF              | $\beta$ sheets-H6   | 0,137569 | 0,908762 | 0,0001                                                    | ***             | t=5,358, df=14 |
| 319-331                                                                       | LXR $\alpha$ /600 sec        | FSYNREDFAKAGL       | $\beta$ sheets-H6   | 0,106789 | 0,885911 | 0,0003                                                    | ***             | t=4,861, df=14 |
| 320-331                                                                       | LXR $\alpha$ /600 sec        | SYNREDFAKAGL        | $\beta$ sheets-H6   | 0,120963 | 0,892896 | <0,0001                                                   | ****            | t=5,382, df=14 |
| 321-331                                                                       | LXR $\alpha$ /600 sec        | YNREDFAKAGL         | $\beta$ sheets-H6   | 0,113321 | 0,785537 | 0,0018                                                    | **              | t=3,909, df=13 |
| 333-341                                                                       | LXR $\alpha$ /600 sec        | VEFINPIFE           | H7                  | 0,160406 | 0,795071 | 0,0002                                                    | ***             | t=4,931, df=14 |
| 334-341                                                                       | LXR $\alpha$ /600 sec        | EFINPIFE            | H7                  | 0,136552 | 0,752029 | 0,0007                                                    | ***             | t=4,303, df=14 |
| 335-341                                                                       | LXR $\alpha$ /600 sec        | FINPIFE             | H7                  | 0,122503 | 0,719301 | 0,0017                                                    | **              | t=3,874, df=14 |
| 341-348                                                                       | LXR $\alpha$ /600 sec        | EF SRAMNE           | H7                  | 0,127799 | 0,758272 | 0,0008                                                    | ***             | t=4,277, df=14 |
| 342-348                                                                       | LXR $\alpha$ /600 sec        | FSRAMNE             | H7                  | 0,116114 | 0,777342 | 0,0004                                                    | ***             | t=4,557, df=14 |

\* t: t-values, df: degrees of freedom

**Supplementary Table 7: Average differences in deuteration levels of the LXR/NCOR1 complexes in comparison with the apo states.**  
**Related to Figure 5**

| Sequence                                                       | Start | End | MaxUptake, Da | $\Delta$ HDX (apo - apo/NCOR1), % |        |         |         |          | P-value  |  |
|----------------------------------------------------------------|-------|-----|---------------|-----------------------------------|--------|---------|---------|----------|----------|--|
|                                                                |       |     |               | 30 sec                            | 60 sec | 180 sec | 600 sec | 1800 sec |          |  |
| <b>LXR<math>\alpha</math> vs. LXR<math>\alpha</math>/NCOR1</b> |       |     |               |                                   |        |         |         |          |          |  |
| GSILPQLSPEQLGM                                                 | 200   | 213 | 7,65          | 2,37                              | 4,37   | 2,28    | -0,6    | 1,91     | 1,22E-01 |  |
| PQLSPEQLGM                                                     | 204   | 213 | 4,95          | 0,23                              | 2,72   | 0,74    | -2,03   | 0,82     | 5,51E-01 |  |
| IEKLVA                                                         | 214   | 219 | 3,31          | -8,26                             | -8,45  | -8,56   | -5,82   | 0,25     | 9,15E-09 |  |
| IEKLVAQQQCNRRSFSDRL                                            | 214   | 233 | 11,39         | -8,89                             | -2,08  | -4,45   | -6,58   | -0,15    | 7,57E-03 |  |
| AQQQCNRRSFSDRL                                                 | 220   | 233 | 7,11          | -6,87                             | 0,12   | -2,89   | -6,98   | -1,68    | 1,85E-01 |  |
| QQQCNRRSFSDRL                                                  | 221   | 233 | 6,33          | -7,5                              | 0,12   | -1,03   | -6,57   | 0,13     | 1,81E-01 |  |
| RRSFSDRL                                                       | 226   | 233 | 2,49          | -2,11                             | 1,82   | 0,82    | -1,03   | 2,27     | 9,64E-01 |  |
| RVTPWPM                                                        | 234   | 240 | 2,5           | -5,22                             | -0,95  | -4,51   | -7,91   | -1,33    | 2,37E-01 |  |
| RVTPWPMAPDPHSRE                                                | 234   | 248 | 5,5           | -4,8                              | 1,6    | -1,52   | -3,15   | -0,9     | 4,64E-01 |  |
| RVTPWPMAPDPHSREARQQRFA                                         | 234   | 257 | 8,96          | -5,11                             | -0,85  | -2,77   | -5,64   | -1,39    | 2,09E-01 |  |
| PMPDPHSREARQQRFAHF                                             | 239   | 257 | 6,4           | -8,41                             | -0,33  | -0,52   | -4,49   | 2,2      | 6,79E-02 |  |
| APDPHSREARQQRFAHF                                              | 241   | 257 | 6,6           | -3,17                             | 2,89   | -0,28   | -2,75   | 2,03     | 7,85E-01 |  |
| LAIVSV                                                         | 260   | 265 | 3,69          | -19,97                            | -19,92 | -21,49  | -22,67  | 2,47     | 1,39E-10 |  |
| AIIVSQE                                                        | 261   | 267 | 4,24          | -18,41                            | -16,89 | -21,56  | -17,76  | -3,8     | 2,32E-11 |  |
| SVQEIV                                                         | 264   | 269 | 3,03          | -15,98                            | -11,86 | -15,02  | -15,03  | -5,9     | 2,27E-08 |  |
| FAKQLPGF                                                       | 271   | 278 | 3,66          | -0,81                             | -0,83  | -1,96   | -4,59   | -6,37    | 7,64E-01 |  |
| FAKQLPGFLQL                                                    | 271   | 281 | 5,91          | 0,49                              | 2,63   | -0,04   | -2,51   | -2,51    | 1,61E-01 |  |
| AKQLPGF                                                        | 272   | 278 | 3             | -0,4                              | -0,11  | -0,26   | -3,88   | -4,9     | 8,23E-01 |  |
| AKQLPGFLQL                                                     | 272   | 281 | 5,13          | -1,61                             | -1,18  | -2,85   | -5,74   | -5,14    | 2,39E-01 |  |
| QLSREDQIALL                                                    | 280   | 290 | 6,25          | -0,98                             | -1,35  | -2,8    | -3,64   | -6,27    | 3,41E-01 |  |
| SREDQIAL                                                       | 282   | 289 | 4,17          | -0,01                             | -0,23  | -2,03   | -4,67   | -2,46    | 6,25E-01 |  |
| SREDQIALL                                                      | 282   | 290 | 4,71          | 4,35                              | 3,73   | 1,64    | -1,45   | 1,74     | 9,12E-07 |  |
| LK TSAIE                                                       | 290   | 296 | 3,84          | -12,42                            | -17,2  | -19,8   | -14,88  | -5,35    | 3,73E-09 |  |
| IEVML                                                          | 295   | 299 | 2,33          | -1,38                             | -1,68  | -1,22   | -4,22   | -4,4     | 1,17E-01 |  |
| LLETSTRRYNPGSE                                                 | 299   | 311 | 6,27          | -3                                | -1,17  | -2,22   | -4,3    | -2,36    | 1,02E-01 |  |
| LLETSTRRYNPGSES                                                | 299   | 312 | 7,69          | -4,62                             | -2,17  | -3,12   | -4,19   | -3,04    | 4,97E-03 |  |
| LLETSTRRYNPGSESIT                                              | 299   | 314 | 9,05          | -5,26                             | -3,51  | -5,85   | -6,37   | -3,46    | 7,00E-03 |  |
| LLETSTRRYNPGSESITF                                             | 299   | 315 | 9,65          | -5,3                              | -3,53  | -4,64   | -6,78   | -3,02    | 4,28E-03 |  |
| LETSTRRYNPGSE                                                  | 300   | 311 | 5,67          | -1,83                             | -0,7   | -1,29   | -2,95   | -1,07    | 3,15E-01 |  |
| LETSTRRYNPGSES                                                 | 300   | 312 | 6,29          | -3,31                             | -1,36  | -1,48   | -3,18   | 0,03     | 8,59E-02 |  |
| LETSTRRYNPGSESITF                                              | 300   | 315 | 8,89          | -7,05                             | -4,92  | -5,51   | -6,81   | -2,83    | 3,70E-04 |  |
| TSRRYNPGSE                                                     | 302   | 311 | 4,74          | 0,05                              | 2,88   | 0,54    | -0,97   | 3,39     | 5,21E-01 |  |
| SITFL                                                          | 312   | 316 | 2,41          | -7,2                              | -3,26  | -4,32   | -3,97   | 0,73     | 1,13E-02 |  |
| LKDFSYNREDF                                                    | 316   | 326 | 5,29          | -8,89                             | -3,82  | -7,48   | -9,21   | -3,27    | 1,05E-03 |  |
| FSYNREDFAKAGL                                                  | 319   | 331 | 7,31          | -9,93                             | -4,67  | -6,32   | -7,61   | -0,42    | 2,81E-04 |  |
| SYNREDFAKAGL                                                   | 320   | 331 | 5,57          | -11,01                            | -6,51  | -6,63   | -7,53   | -3,94    | 4,03E-04 |  |
| YNREDF                                                         | 321   | 326 | 2,69          | -8,78                             | -6,55  | -8,67   | -8,76   | -4,19    | 1,20E-03 |  |
| YNREDFAKAGL                                                    | 321   | 331 | 4,35          | -17,91                            | -11,24 | -6,1    | -6,27   | 0,43     | 3,16E-06 |  |
| FAKAGL                                                         | 326   | 331 | 2,99          | -3,65                             | 0,42   | 0,75    | -1,35   | 2,66     | 3,04E-01 |  |
| AKAGL                                                          | 327   | 331 | 2,29          | -4,73                             | 0,74   | 0,34    | -0,09   | 2,94     | 3,01E-01 |  |
| QVEFINPIFE                                                     | 332   | 341 | 4,6           | -1,87                             | -3,98  | -4,37   | -6      | -4,27    | 9,40E-02 |  |
| VEFINPIFE                                                      | 333   | 341 | 4,26          | -2,29                             | -7,92  | -4,02   | -8,06   | -0,19    | 5,46E-02 |  |
| EFINPIFE                                                       | 334   | 341 | 3,6           | -4,3                              | -7,86  | -6,27   | -9,97   | -2,28    | 1,36E-03 |  |
| FINPIF                                                         | 335   | 340 | 2,28          | -5,69                             | -2,68  | -8,4    | -9,78   | -4,17    | 1,59E-03 |  |
| FINPIFE                                                        | 335   | 341 | 3,03          | -3,69                             | -5,68  | -9,11   | -11,22  | -4,06    | 3,94E-04 |  |
| INPIFE                                                         | 336   | 341 | 2,44          | -3,35                             | -5,25  | -8,66   | -11,63  | -3,45    | 1,37E-03 |  |
| FSRAMNE                                                        | 342   | 348 | 3,61          | 0,54                              | -0,86  | -1,88   | -4,7    | 1,35     | 7,76E-01 |  |
| LQLND                                                          | 349   | 353 | 2,39          | 0,13                              | -0,27  | -0,51   | -0,8    | 2,45     | 7,07E-01 |  |
| LQLNDAE                                                        | 349   | 355 | 3,84          | -2,56                             | -0,85  | -3,73   | -3,2    | -1,85    | 7,27E-02 |  |
| NDAEF                                                          | 352   | 356 | 2,11          | 0,48                              | 0,51   | 0,1     | -3,91   | -0,44    | 6,15E-01 |  |
| ALLIA                                                          | 357   | 361 | 2,4           | -1,78                             | -1,18  | -2      | -3,48   | -3,48    | 2,09E-03 |  |
| IAISIF                                                         | 360   | 365 | 3,57          | -1,18                             | -1,11  | -1,6    | -3,25   | -2,96    | 1,86E-02 |  |
| ISIFSA                                                         | 362   | 367 | 3,23          | 0,51                              | 2,06   | 2,07    | -4,65   | -4,77    | 3,53E-01 |  |
| ISIFSADRPNVQDQL                                                | 362   | 376 | 8,91          | -4,11                             | -4,5   | -4,8    | -6,81   | -3,94    | 1,06E-02 |  |
| SADRPNVQDQL                                                    | 366   | 376 | 5,75          | -2,5                              | 0,29   | 0,18    | -3,64   | -0,2     | 5,98E-01 |  |
| SADRPNVQDQLQ                                                   | 366   | 377 | 6,55          | 2,13                              | 3,32   | 0,29    | -4,15   | -0,7     | 3,31E-01 |  |
| SADRPNVQDQLQV                                                  | 366   | 378 | 6,94          | 1,12                              | 0,74   | -0,29   | -4,27   | -0,88    | 6,50E-01 |  |
| QVERLQHTY                                                      | 377   | 385 | 3,75          | 2,19                              | 1,63   | 2,42    | 3,44    | 4,58     | 1,11E-01 |  |
| QVERLQHTYV                                                     | 377   | 386 | 4,76          | 1,95                              | 1,69   | 0,18    | 2,08    | -0,29    | 5,23E-02 |  |
| QVERLQHTYVE                                                    | 377   | 387 | 5,69          | -0,74                             | -1,78  | -1,79   | -3,21   | -2,29    | 8,68E-02 |  |
| QVERLQHTYVEAL                                                  | 377   | 389 | 7,23          | -1,18                             | -2,2   | -2,96   | -4,38   | -4,4     | 1,07E-02 |  |
| ERLQHTYVEAL                                                    | 379   | 389 | 4,88          | 1,08                              | -1,46  | -3,62   | -2,88   | -6,75    | 9,03E-01 |  |
| HAYVSIHHPHDRL                                                  | 390   | 402 | 3,44          | -4,04                             | -2,1   | -2,12   | -5,52   | -7,22    | 3,15E-01 |  |
| HAYVSIHHPHDRLMF                                                | 390   | 404 | 4,55          | -5,22                             | -2,94  | -5,02   | -9,46   | -4,83    | 1,13E-03 |  |
| YVSIHHPHDRL                                                    | 392   | 402 | 2             | -7,46                             | -8,1   | -10,34  | -13,72  | -3,78    | 7,91E-03 |  |
| YVSIHHPHDRLMF                                                  | 392   | 404 | 3,52          | -3,28                             | -2,19  | -2,98   | -7,01   | -3,76    | 4,46E-02 |  |
| YVSIHHPHDRLMFPRM                                               | 392   | 407 | 5,42          | -4,5                              | -3,84  | -3,67   | -7,38   | -1,22    | 3,24E-04 |  |
| LMKLV                                                          | 408   | 413 | 3,26          | 0,39                              | 0,73   | -1,11   | -3,13   | 1,3      | 9,75E-01 |  |
| KLVSL                                                          | 410   | 414 | 2,38          | -2,31                             | -1,01  | -3,8    | -4,4    | 2,58     | 2,91E-01 |  |
| VSLRTLSSV                                                      | 412   | 420 | 5,5           | -2,05                             | -2,28  | -2,01   | -7,54   | -5,23    | 4,27E-01 |  |
| VSLRTLSSVHSEQVF                                                | 412   | 426 | 7,83          | -6,52                             | -1,34  | -3,63   | -8,56   | -3,43    | 6,31E-02 |  |
| VSLRTLSSVHSEQVFA                                               | 412   | 427 | 8,48          | -6,64                             | -2,03  | -4,01   | -8,68   | -3,39    | 3,55E-02 |  |
| LRTLSSVHSEQVF                                                  | 414   | 426 | 6,07          | -5,44                             | -2,12  | -3,95   | -6,76   | -0,52    | 9,60E-02 |  |
| LRTLSSVHSEQVFA                                                 | 414   | 427 | 6,73          | -7,21                             | -1     | -3,74   | -9,85   | -3,38    | 7,39E-02 |  |
| RTLSSVHSEQVF                                                   | 415   | 426 | 5,54          | -6,01                             | -2,93  | -3,7    | -8,75   | -3,25    | 8,02E-02 |  |
| RTLSSVHSEQVFA                                                  | 415   | 427 | 6,1           | -6,73                             | -1     | -2,96   | -7,72   | -1,73    | 1,19E-01 |  |
| ALRLQDKKLPPLL                                                  | 427   | 439 | 5,94          | -3,27                             | 0,84   | -0,63   | -4,14   | 0,74     | 5,82E-01 |  |
| ALRLQDKKLPPLLS                                                 | 427   | 440 | 7,11          | -4,46                             | 0,27   | -1,37   | -6,48   | 0,26     | 3,93E-01 |  |
| ALRLQDKKLPPLLSE                                                | 427   | 441 | 7,35          | -5,07                             | 0,61   | 0,69    | -4,52   | 1,02     | 4,71E-01 |  |
| ALRLQDKKLPPLLSEI                                               | 427   | 442 | 8,13          | -1,6                              | 1,99   | 1,27    | -2,94   | 1,11     | 9,91E-01 |  |
| ALRLQDKKLPPLLSEIW                                              | 427   | 443 | 8,37          | 0,32                              | 3,55   | 1,53    | 0,03    | 2,5      | 6,36E-01 |  |
| LRLQDKKLPPLL                                                   | 428   | 439 | 5,27          | -2,26                             | 1,14   | -0,54   | -2,25   | 1,86     | 6,87E-01 |  |

|                            |     |     |       |        |        |        |        |        |          |
|----------------------------|-----|-----|-------|--------|--------|--------|--------|--------|----------|
| LRLQDKKLPPLLS              | 428 | 440 | 6,2   | -5     | -0,21  | -1,9   | -5,43  | 0,33   | 2,90E-01 |
| LRLQDKKLPPLLSE             | 428 | 441 | 6,37  | -1,13  | 1,41   | 1,07   | -3,67  | 2,48   | 9,49E-01 |
| LRLQDKKLPPLLSEI            | 428 | 442 | 6,78  | -3,02  | 0,41   | 0,38   | -4,43  | 0,88   | 6,64E-01 |
| LRLQDKKLPPLLSEIW           | 428 | 443 | 7,78  | 1,23   | 3,25   | 2,38   | -0,96  | 0,81   | 5,15E-01 |
| SEIWDVHE                   | 440 | 447 | 4,19  | -5,62  | -0,4   | -2,55  | -6,79  | -1,5   | 2,28E-01 |
| WDVHE                      | 443 | 447 | 1,8   | 0,15   | 2,79   | 3,91   | -0,34  | 1,04   | 5,55E-01 |
| <b>LXRβ vs. LXRβ/NCOR1</b> |     |     |       |        |        |        |        |        |          |
| VQLTA                      | 218 | 222 | 2,77  | 1,27   | 1,7    | 1,22   | 0,43   | 0,71   | 4,12E-01 |
| VQLTAAQE                   | 218 | 225 | 5,16  | 2,24   | 0,96   | -0,82  | -0,25  | -1,97  | 3,03E-01 |
| VQLTAAQEL                  | 218 | 226 | 5,72  | 3,28   | 2,67   | 1,1    | 2,83   | -2,34  | 2,19E-02 |
| TAAQEL                     | 221 | 226 | 3,25  | 5,17   | 4,17   | 0,42   | 6,09   | 2,8    | 3,70E-02 |
| LMIQQ                      | 226 | 230 | 2,48  | 0,22   | -4,57  | -2,55  | -1,69  | -10,75 | 6,97E-01 |
| LMIQQLVA                   | 226 | 233 | 4,22  | 0,03   | -0,48  | -2,12  | -2,62  | -12,99 | 7,65E-01 |
| MIQQLVA                    | 227 | 233 | 4,25  | -0,18  | -0,66  | -2,5   | -3,33  | -12,52 | 8,89E-01 |
| IQQLVA                     | 228 | 233 | 3,49  | -1,84  | -1,84  | -1,68  | -3,45  | -13,07 | 5,34E-01 |
| VAAQL                      | 232 | 236 | 2,86  | 1,37   | -0,32  | -1,83  | -4,1   | -3,88  | 7,79E-01 |
| AQLQC                      | 234 | 238 | 2,5   | 4,31   | 3,51   | 5,16   | 3,64   | 1,43   | 2,95E-02 |
| LAIISV                     | 274 | 279 | 3,58  | -12,05 | -15,92 | -22,68 | -23,66 | -15,73 | 4,43E-09 |
| AIISVQE                    | 275 | 281 | 4,25  | -12,52 | -13,9  | -19,37 | -21,55 | -14,17 | 2,44E-13 |
| FAKQVPGF                   | 285 | 292 | 3,57  | 2,85   | 2,35   | 1,57   | 1,93   | -1,43  | 4,18E-03 |
| FAKQVPGFLQL                | 285 | 295 | 6,01  | -0,86  | -2,69  | -1,42  | -2,13  | -5,89  | 4,72E-01 |
| AKQVPGF                    | 286 | 292 | 2,81  | 0,06   | 0,5    | 0      | -1,41  | -6,38  | 2,57E-01 |
| AKQVPGFLQL                 | 286 | 295 | 5,35  | -0,51  | -0,89  | -0,96  | -2,16  | -5,37  | 2,15E-02 |
| LQLGREDQ                   | 293 | 300 | 3,8   | -0,94  | -0,76  | -0,7   | -1,29  | -3,11  | 6,60E-01 |
| GREDQIAL                   | 296 | 303 | 3,86  | -0,42  | -0,35  | -1,25  | -0,76  | -2,71  | 6,27E-01 |
| GREDQIALL                  | 296 | 304 | 4,48  | 0,33   | -0,01  | -0,65  | -0,23  | -1,72  | 5,53E-01 |
| LLKASTIE                   | 303 | 310 | 4,59  | -12,41 | -17,52 | -21,04 | -16,82 | -14,99 | 5,34E-10 |
| LKASTIE                    | 304 | 310 | 3,83  | -16,85 | -21    | -21,36 | -12,81 | -3,72  | 1,26E-10 |
| KASTIE                     | 305 | 310 | 2,96  | -14,79 | -15,34 | -17,22 | -13,91 | -4,25  | 9,89E-10 |
| LLETARRYNHETE              | 313 | 325 | 5,43  | 7,3    | 3,94   | 0,62   | 2,14   | -2,41  | 3,34E-05 |
| LLETARRYNHETEC             | 313 | 326 | 6,16  | 7,72   | 4,43   | 1,51   | 2,13   | 0,28   | 4,24E-07 |
| LETARRYNHETEC              | 314 | 326 | 5,28  | 6,07   | 4,19   | 0,81   | 0,31   | -0,77  | 1,73E-04 |
| LKDFTYSKDDF                | 330 | 340 | 4,82  | -0,27  | -1,19  | -4,05  | -4,91  | -6,77  | 9,74E-01 |
| FTYSKDDF                   | 333 | 340 | 3,63  | -1,19  | -1,25  | -2,81  | -5,23  | -6,83  | 8,15E-01 |
| FTYSKDDFHRAGL              | 333 | 345 | 5,41  | 1,74   | 1,53   | -2,06  | -5,33  | -5,68  | 1,22E-01 |
| FTYSKDDFHRAGLQ             | 333 | 346 | 6,1   | 1,07   | 2,25   | -0,71  | -3,18  | -4,4   | 1,72E-01 |
| YSKDDF                     | 335 | 340 | 2,46  | -1,33  | -1,04  | -2,81  | -5,75  | -9,58  | 6,87E-01 |
| HRAGLQV                    | 341 | 347 | 3,22  | 0,81   | 5,13   | 2,25   | -1,67  | -3,64  | 6,73E-02 |
| HRAGLQVE                   | 341 | 348 | 3,54  | 2,75   | 5,39   | 3,3    | 1,25   | -0,56  | 1,33E-01 |
| VEFINPIPE                  | 347 | 355 | 4,41  | 2,98   | 0,69   | -0,05  | 0,93   | -0,36  | 1,72E-01 |
| EFINPIPE                   | 348 | 355 | 3,67  | -0,48  | 0,74   | 0,99   | 0,88   | 1,15   | 8,67E-01 |
| FINPIF                     | 349 | 354 | 2,38  | -0,19  | -1,64  | -3,18  | -3,76  | -1,25  | 4,43E-01 |
| FINPIPE                    | 349 | 355 | 3,07  | 0,2    | -1,5   | -1,87  | -0,23  | -2,11  | 5,78E-01 |
| INPIPE                     | 350 | 355 | 2,46  | -1,19  | -2,04  | -0,58  | 1,78   | 0,06   | 4,22E-01 |
| FSRAMRRLGLDDAE             | 356 | 369 | 6,84  | -0,72  | -1,06  | -1,99  | -1,99  | -4,39  | 7,96E-01 |
| SRAMRRLGLDDAE              | 357 | 369 | 6,61  | -2,91  | -0,77  | -1,7   | -2,45  | -6,34  | 3,96E-01 |
| MRRRLGLDDAE                | 360 | 369 | 4,45  | -0,23  | 0,12   | -0,91  | 0,28   | -0,46  | 9,07E-01 |
| IAINI                      | 374 | 378 | 2,77  | -0,02  | -1,89  | -0,94  | -0,79  | -1,07  | 6,47E-02 |
| IAINIF                     | 374 | 379 | 3,5   | -0,52  | -0,87  | -0,91  | -1,43  | -1,2   | 2,65E-03 |
| IAINIFSADRPNVQEPGRVEA      | 374 | 394 | 12,22 | 0,2    | -2,02  | -3     | -3,45  | -4,59  | 5,83E-01 |
| INIFSADRPNVQEPGRVEA        | 376 | 394 | 10,97 | -1,3   | -1,94  | -3,09  | -3,92  | -4,62  | 8,75E-02 |
| IFSADRPNVQEPGRVEA          | 378 | 394 | 8,94  | -3,32  | -2,33  | -2,11  | -3,18  | -5,67  | 1,21E-01 |
| FSADRPNVQEPGRVEA           | 379 | 394 | 8,19  | -1,02  | -2,01  | -2,92  | -2,48  | -2,93  | 2,58E-01 |
| SADRPNVQEPGRV              | 380 | 392 | 6,59  | -0,01  | -2,14  | -2,7   | -2,37  | -4,14  | 5,59E-01 |
| SADRPNVQEPGRVEA            | 380 | 394 | 7,84  | -0,44  | -2,4   | -3,52  | -3,46  | -4,22  | 2,34E-01 |
| SADRPNVQEPGRVEALQQPYVE     | 380 | 401 | 12,75 | -2,21  | -3,32  | -3,87  | -5,29  | -6,93  | 3,66E-04 |
| SADRPNVQEPGRVEALQQPYVE/    | 380 | 403 | 13,97 | -1,29  | -2,72  | -3,38  | -3,52  | -5,83  | 3,40E-03 |
| PGRVEA                     | 389 | 394 | 2,76  | -0,04  | -1,98  | -4,04  | -0,86  | -1,64  | 5,01E-01 |
| LQQPYVE                    | 395 | 401 | 3,48  | 0,09   | -0,17  | -1,04  | -1,48  | -7,21  | 5,90E-01 |
| LSYTRIKRPQDQLRF            | 404 | 418 | 8,54  | -0,61  | -1,94  | -2,38  | -3,68  | -6,09  | 5,23E-01 |
| SYTRIKRPQDQLRF             | 405 | 418 | 7,77  | 0,69   | -2,19  | -2,68  | -2,52  | -5,14  | 9,45E-01 |
| YTRIKRPQDQLRF              | 406 | 418 | 6,77  | -3,19  | -3,38  | -6,15  | -3,64  | -4,53  | 1,16E-02 |
| YTRIKRPQDQLRFPRM           | 406 | 421 | 8,57  | -0,98  | -2,14  | -2,54  | -2,37  | -6,72  | 4,44E-01 |
| TRIKRPQDQLRFPRM            | 407 | 421 | 7,88  | -1,71  | -3,69  | -4,95  | 2,17   | -2,87  | 5,61E-02 |
| KLVSL                      | 424 | 428 | 2,43  | -1,14  | -3,92  | -4,76  | -3,35  | -5,02  | 3,85E-01 |
| VSLRTLSSV                  | 426 | 434 | 5,58  | -3,78  | -4,33  | -4,76  | -4,66  | -4,91  | 7,39E-03 |
| VSLRTLSSVHSEQVF            | 426 | 440 | 7,96  | -4,62  | -4,16  | -5,54  | -7,15  | -9,55  | 6,07E-03 |
| VSLRTLSSVHSEQVFA           | 426 | 441 | 8,66  | -2,88  | -3,43  | -4,81  | -6,02  | -8,46  | 9,08E-02 |
| LRTLSSVHSEQVF              | 428 | 440 | 6,12  | -5,55  | -8,26  | -7,3   | -8,86  | -10,3  | 8,86E-04 |
| RTLSSV                     | 429 | 434 | 2,99  | 0,78   | 0,23   | 0,24   | 0,62   | -2,21  | 5,07E-01 |
| RTLSSVHSEQVF               | 429 | 440 | 5,56  | -4,72  | -4,52  | -6,37  | -6,92  | -8,74  | 9,75E-03 |
| RTLSSVHSEQVFA              | 429 | 441 | 6,14  | -4,09  | -4,48  | -5,85  | -6,5   | -8,57  | 2,31E-02 |
| ALRLQDKKLPPLL              | 441 | 453 | 6,08  | -2,86  | -0,52  | -2,05  | -3,28  | -3,89  | 6,84E-01 |
| ALRLQDKKLPPLLS             | 441 | 454 | 6,89  | -1,23  | -1,51  | -1,82  | -1,62  | -2,49  | 7,70E-01 |
| ALRLQDKKLPPLLSEI           | 441 | 456 | 7,48  | 1,35   | 3,05   | 0,02   | 2,14   | -3,07  | 3,24E-01 |
| ALRLQDKKLPPLLSEIW          | 441 | 457 | 8,52  | 2,45   | 0,95   | -0,12  | 1,44   | 1,02   | 4,27E-01 |
| LRLQDKKLPPLL               | 442 | 453 | 5,37  | 0,35   | 0,35   | -1,7   | -0,04  | -0,97  | 8,37E-01 |
| SEIWDVHE                   | 454 | 461 | 4,24  | -0,48  | -0,75  | -1,78  | -3,96  | -2,1   | 8,33E-01 |
| WDVHE                      | 457 | 461 | 1,85  | 3,07   | -0,82  | -0,43  | 0,44   | -1,03  | 4,00E-01 |

Number of replicates: 3

Number of exposure times: 6

% of deuterium: 95 %

Statistical significance value: 1 %

Statistically significant peptides are highlighted in grey

**Supplementary Table 8: Contributions of LXR $\alpha$  and LXR $\beta$  peptides to separation between lipogenic and non-lipogenic classes of ligands (TG p(corr)) and Related to Figure 6**

| Peptide | LXR isoform & Labelling Time | Amino Acid Sequence | Secondary Structure | TG p(corr) | ABCA1 p(corr) |
|---------|------------------------------|---------------------|---------------------|------------|---------------|
| 260-265 | LXR $\alpha$ /30 sec         | LAIVSV              | H3                  | 0,182522   | 0,894756      |
| 261-267 | LXR $\alpha$ /30 sec         | AIVSVQE             | H3                  | 0,159467   | 0,904123      |
| 264-269 | LXR $\alpha$ /30 sec         | SVQEIV              | H3                  | 0,188553   | 0,927907      |
| 316-326 | LXR $\alpha$ /30 sec         | LKDFSYNREDF         | $\beta$ sheets-H6   | 0,284438   | 0,666177      |
| 260-265 | LXR $\alpha$ /10 min         | LAIVSV              | H3                  | 0,115661   | 0,87557       |
| 261-267 | LXR $\alpha$ /10 min         | AIVSVQE             | H3                  | 0,172573   | 0,89756       |
| 264-269 | LXR $\alpha$ /10 min         | SVQEIV              | H3                  | 0,109048   | 0,861406      |
| 299-312 | LXR $\alpha$ /10 min         | LLETSTRRYNPGSES     | H5- $\beta$ sheets  | 0,215267   | 0,695628      |
| 300-312 | LXR $\alpha$ /10 min         | LETSTRRYNPGSES      | H5- $\beta$ sheets  | 0,288253   | 0,806184      |
| 299-314 | LXR $\alpha$ /10 min         | LLETSTRRYNPGSESIT   | H5- $\beta$ sheets  | 0,214434   | 0,798007      |
| 299-315 | LXR $\alpha$ /10 min         | LLETSTRRYNPGSESITF  | H5- $\beta$ sheets  | 0,189743   | 0,791755      |
| 300-315 | LXR $\alpha$ /10 min         | LETSTRRYNPGSESITF   | H5- $\beta$ sheets  | 0,203299   | 0,796625      |
| 316-326 | LXR $\alpha$ /10 min         | LKDFSYNREDF         | $\beta$ sheets-H6   | 0,079581   | 0,784793      |
| 319-324 | LXR $\alpha$ /10 min         | FSYNRE              | $\beta$ sheets-H6   | 0,208335   | 0,731671      |
| 319-326 | LXR $\alpha$ /10 min         | FSYNREDF            | $\beta$ sheets-H6   | 0,199409   | 0,860933      |
| 320-326 | LXR $\alpha$ /10 min         | SYNREDF             | $\beta$ sheets-H6   | 0,178388   | 0,846516      |
| 321-326 | LXR $\alpha$ /10 min         | YNREDF              | $\beta$ sheets-H6   | 0,284359   | 0,908762      |
| 249-257 | LXR $\alpha$ /30 sec         | ARQQRFAHF           | H3                  | 0,418542   | 0,676627      |
| 299-314 | LXR $\alpha$ /30 sec         | LLETSTRRYNPGSESIT   | H5- $\beta$ sheets  | 0,417924   | 0,52989       |
| 299-315 | LXR $\alpha$ /30 sec         | LLETSTRRYNPGSESITF  | H5- $\beta$ sheets  | 0,396382   | 0,632145      |
| 300-315 | LXR $\alpha$ /30 sec         | LETSTRRYNPGSESITF   | H5- $\beta$ sheets  | 0,353796   | 0,605197      |
| 312-316 | LXR $\alpha$ /30 sec         | SITFL               | $\beta$ sheets      | 0,468028   | 0,80345       |
| 319-324 | LXR $\alpha$ /30 sec         | FSYNRE              | $\beta$ sheets-H6   | 0,450246   | 0,781694      |
| 319-326 | LXR $\alpha$ /30 sec         | FSYNREDF            | $\beta$ sheets-H6   | 0,482254   | 0,724336      |
| 320-326 | LXR $\alpha$ /30 sec         | SYNREDF             | $\beta$ sheets-H6   | 0,468115   | 0,735341      |
| 321-326 | LXR $\alpha$ /30 sec         | YNREDF              | $\beta$ sheets-H6   | 0,432617   | 0,63457       |
| 299-311 | LXR $\alpha$ /10 min         | LLETSTRRYNPGSE      | H5- $\beta$ sheets  | 0,331435   | 0,728003      |
| 300-311 | LXR $\alpha$ /10 min         | LETSTRRYNPGSE       | H5- $\beta$ sheets  | 0,302295   | 0,750937      |
| 321-331 | LXR $\alpha$ /10 min         | YNREDFAKAGL         | $\beta$ sheets-H6   | 0,435873   | 0,687789      |
| 329-339 | LXR $\beta$ /10 min          | LKDFTYSKDDF         | $\beta$ sheets, H6  | 0,417366   | 0,545559      |
| 332-338 | LXR $\beta$ /10 min          | FTYSKDD             | $\beta$ sheets, H6  | 0,336483   | 0,504645      |
| 332-339 | LXR $\beta$ /10 min          | FTYSKDDF            | $\beta$ sheets, H6  | 0,424319   | 0,624182      |
| 334-339 | LXR $\beta$ /10 min          | YSKDDF              | $\beta$ sheets, H6  | 0,392926   | 0,509046      |
| 270-275 | LXR $\alpha$ /30 sec         | DFAKQL              | H3                  | 0,693751   | 0,744891      |
| 319-331 | LXR $\alpha$ /30 sec         | FSYNREDFAKAGL       | $\beta$ sheets-H6   | 0,565468   | 0,698778      |
| 320-331 | LXR $\alpha$ /30 sec         | SYNREDFAKAGL        | $\beta$ sheets-H6   | 0,638015   | 0,778358      |
| 321-331 | LXR $\alpha$ /30 sec         | YNREDFAKAGL         | $\beta$ sheets-H6   | 0,572388   | 0,574976      |
| 326-331 | LXR $\alpha$ /30 sec         | FAKAGL              | H6                  | 0,678162   | 0,654782      |
| 327-331 | LXR $\alpha$ /30 sec         | AKAGL               | H6                  | 0,639354   | 0,649576      |
| 270-275 | LXR $\alpha$ /10 min         | DFAKQL              | H3                  | 0,624923   | 0,718343      |
| 319-331 | LXR $\alpha$ /10 min         | FSYNREDFAKAGL       | $\beta$ sheets-H6   | 0,532743   | 0,885911      |
| 320-331 | LXR $\alpha$ /10 min         | SYNREDFAKAGL        | $\beta$ sheets-H6   | 0,593985   | 0,892896      |
| 326-331 | LXR $\alpha$ /10 min         | FAKAGL              | H6                  | 0,694186   | 0,625754      |
| 334-340 | LXR $\alpha$ /10 min         | EFINPIF             | H7                  | 0,620582   | 0,677953      |
| 334-341 | LXR $\alpha$ /10 min         | EFINPIFE            | H7                  | 0,562785   | 0,752029      |
| 335-340 | LXR $\alpha$ /10 min         | FINPIF              | H7                  | 0,614977   | 0,663262      |
| 335-341 | LXR $\alpha$ /10 min         | FINPIFE             | H7                  | 0,567325   | 0,719301      |
| 336-341 | LXR $\alpha$ /10 min         | INPIFE              | H7                  | 0,503321   | 0,666359      |
| 341-348 | LXR $\alpha$ /10 min         | EFSRAMNE            | H7                  | 0,530387   | 0,758272      |
| 342-348 | LXR $\alpha$ /10 min         | FSRAMNE             | H7                  | 0,685637   | 0,777342      |
| 313-325 | LXR $\beta$ /10 min          | LETARRYNHETEC       | H5, $\beta$ sheets  | 0,623272   | 0,527395      |
| 333-344 | LXR $\beta$ /10 min          | TYSKDDFHRAGL        | $\beta$ sheets, H6  | 0,635216   | 0,541832      |
| 290-296 | LXR $\alpha$ /10 min         | LK TSAIE            | H5                  | 0,743081   | 0,737769      |
| 327-331 | LXR $\alpha$ /10 min         | AKAGL               | H6                  | 0,759729   | 0,692876      |
| 333-341 | LXR $\alpha$ /10 min         | VEFINPIFE           | H7                  | 0,727585   | 0,795071      |
| 332-344 | LXR $\beta$ /10 min          | FTYSKDDFHRAGL       | $\beta$ sheets, H6  | 0,733755   | 0,522827      |
| 340-347 | LXR $\beta$ /10 min          | HRAGLQVE            | H6-H7               | 0,738019   | 0,506801      |
| 412-426 | LXR $\alpha$ /30 sec         | VSLRTLSSVHSEQVF     | H10/11              | 0,715587   | 0,19401       |
| 412-427 | LXR $\alpha$ /30 sec         | VSLRTLSSVHSEQVFA    | H10/11              | 0,721315   | 0,234654      |
| 414-426 | LXR $\alpha$ /30 sec         | LRTLSSVHSEQVF       | H10/11              | 0,734507   | 0,246694      |
| 414-427 | LXR $\alpha$ /30 sec         | LRTLSSVHSEQVFA      | H10/11              | 0,74986    | 0,288152      |
| 415-426 | LXR $\alpha$ /30 sec         | RTLSSVHSEQVF        | H10/11              | 0,74078    | 0,281914      |
| 415-427 | LXR $\alpha$ /30 sec         | RTLSSVHSEQVFA       | H10/11              | 0,748133   | 0,308221      |
| 427-442 | LXR $\alpha$ /30 sec         | ALRLQDKKLPPLLSEI    | H10/11-H12          | 0,692639   | 0,329802      |
| 428-441 | LXR $\alpha$ /30 sec         | LRLQDKKLPPLLSE      | H10/11-H12          | 0,773292   | 0,303054      |
| 427-443 | LXR $\alpha$ /30 sec         | ALRLQDKKLPPLLSEIW   | H10/11-H12          | 0,775786   | 0,350804      |
| 428-442 | LXR $\alpha$ /30 sec         | LRLQDKKLPPLLSEI     | H10/11-H12          | 0,741346   | 0,310625      |
| 428-443 | LXR $\alpha$ /30 sec         | LRLQDKKLPPLLSEIW    | H10/11-H12          | 0,711789   | 0,228448      |

|         |                      |                   |                    |          |          |
|---------|----------------------|-------------------|--------------------|----------|----------|
| 440-447 | LXR $\alpha$ /30 sec | SEIWDVHE          | H12                | 0,825616 | 0,269342 |
| 441-446 | LXR $\alpha$ /30 sec | EIWDVH            | H12                | 0,920834 | 0,405315 |
| 214-219 | LXR $\alpha$ /10 min | IEKLVA            | H1                 | 0,825104 | 0,483172 |
| 332-344 | LXR $\beta$ /30 sec  | FTYSKDDFHRAGL     | $\beta$ sheets, H6 | 0,887247 | 0,289212 |
| 332-345 | LXR $\beta$ /30 sec  | FTYSKDDFHRAQLQ    | $\beta$ sheets, H6 | 0,870471 | 0,244108 |
| 340-345 | LXR $\beta$ /30 sec  | HRAGLQ            | H6-H7              | 0,818952 | 0,144587 |
| 340-346 | LXR $\beta$ /30 sec  | HRAGLQV           | H6-H7              | 0,837063 | 0,063208 |
| 340-347 | LXR $\beta$ /30 sec  | HRAGLQVE          | H6-H7              | 0,791383 | 0,109854 |
| 340-348 | LXR $\beta$ /30 sec  | HRAGLQVEF         | H6-H7              | 0,833864 | -0,01266 |
| 348-353 | LXR $\beta$ /30 sec  | FINPIF            | H7                 | 0,705961 | 0,055966 |
| 348-354 | LXR $\beta$ /30 sec  | FINPIFE           | H7                 | 0,70169  | 0,103884 |
| 427-439 | LXR $\beta$ /30 sec  | LRTLSSVHSEQVF     | H10/11             | 0,695051 | -0,2291  |
| 428-439 | LXR $\beta$ /30 sec  | RTLSSVHSEQVF      | H10/11             | 0,717002 | -0,20853 |
| 428-440 | LXR $\beta$ /30 sec  | RTLSSVHSEQVFA     | H10/11             | 0,724354 | -0,20452 |
| 440-452 | LXR $\beta$ /30 sec  | ALRLQDKKLPPLL     | H10/11-H12         | 0,713708 | -0,19998 |
| 440-453 | LXR $\beta$ /30 sec  | ALRLQDKKLPPLLS    | H10/11-H12         | 0,713626 | -0,1705  |
| 440-456 | LXR $\beta$ /30 sec  | ALRLQDKKLPPLLSEIW | H10/11-H12         | 0,723603 | -0,21667 |
| 303-309 | LXR $\beta$ /10 min  | LKASTIE           | H5                 | 0,698917 | -0,19051 |
| 304-309 | LXR $\beta$ /10 min  | KASTIE            | H5                 | 0,7409   | -0,15521 |
| 332-345 | LXR $\beta$ /10 min  | FTYSKDDFHRAQLQ    | $\beta$ sheets, H6 | 0,736355 | 0,453479 |
| 340-345 | LXR $\beta$ /10 min  | HRAGLQ            | H6-H7              | 0,796951 | 0,351468 |
| 340-346 | LXR $\beta$ /10 min  | HRAGLQV           | H6-H7              | 0,756441 | 0,303586 |
| 340-348 | LXR $\beta$ /10 min  | HRAGLQVEF         | H6-H7              | 0,768548 | 0,356207 |
| 347-354 | LXR $\beta$ /10 min  | EFINPIFE          | H7                 | 0,718621 | 0,196037 |
| 348-353 | LXR $\beta$ /10 min  | FINPIF            | H7                 | 0,79585  | 0,164408 |
| 348-354 | LXR $\beta$ /10 min  | FINPIFE           | H7                 | 0,769606 | 0,190399 |
| 425-433 | LXR $\beta$ /10 min  | VSLRTLSSV         | H10/11             | 0,712973 | -0,20832 |
| 425-439 | LXR $\beta$ /10 min  | VSLRTLSSVHSEQVF   | H10/11             | 0,792896 | 0,010273 |
| 425-440 | LXR $\beta$ /10 min  | VSLRTLSSVHSEQVFA  | H10/11             | 0,7865   | 0,038314 |
| 427-439 | LXR $\beta$ /10 min  | LRTLSSVHSEQVF     | H10/11             | 0,785936 | 0,061934 |
| 428-439 | LXR $\beta$ /10 min  | RTLSSVHSEQVF      | H10/11             | 0,803832 | 0,122333 |
| 428-440 | LXR $\beta$ /10 min  | RTLSSVHSEQVFA     | H10/11             | 0,785316 | 0,133228 |
| 214-219 | LXR $\alpha$ /30 sec | IEKLVA            | H1                 | 0,679262 | 0,297033 |
| 333-341 | LXR $\alpha$ /30 sec | VEFINPIFE         | H7                 | 0,610977 | 0,408623 |
| 335-340 | LXR $\alpha$ /30 sec | FINPIF            | H7                 | 0,678346 | 0,255072 |
| 412-420 | LXR $\alpha$ /30 sec | VSLRTLSSV         | H10/11             | 0,568705 | -0,09631 |
| 415-420 | LXR $\alpha$ /30 sec | RTLSSV            | H10/11             | 0,614924 | 0,049547 |
| 412-424 | LXR $\alpha$ /30 sec | VSLRTLSSVHSEQ     | H10/11             | 0,496817 | 0,138156 |
| 333-344 | LXR $\beta$ /30 sec  | TYSKDDFHRAGL      | $\beta$ sheets, H6 | 0,682076 | 0,224845 |
| 347-354 | LXR $\beta$ /30 sec  | EFINPIFE          | H7                 | 0,577512 | 0,111056 |
| 425-433 | LXR $\beta$ /30 sec  | VSLRTLSSV         | H10/11             | 0,510977 | -0,29788 |
| 425-439 | LXR $\beta$ /30 sec  | VSLRTLSSVHSEQVF   | H10/11             | 0,661735 | -0,25375 |
| 425-440 | LXR $\beta$ /30 sec  | VSLRTLSSVHSEQVFA  | H10/11             | 0,665791 | -0,27201 |
| 440-455 | LXR $\beta$ /30 sec  | ALRLQDKKLPPLLSEI  | H10/11-H12         | 0,685638 | -0,32356 |
| 453-460 | LXR $\beta$ /30 sec  | SEIWDVHE          | H12                | 0,609005 | -0,37618 |
| 454-459 | LXR $\beta$ /30 sec  | EIWDVH            | H12                | 0,496634 | -0,47956 |
| 454-460 | LXR $\beta$ /30 sec  | EIWDVHE           | H12                | 0,603427 | -0,32202 |
| 273-278 | LXR $\beta$ /10 min  | LAISV             | H3                 | 0,4962   | 0,028651 |
| 273-280 | LXR $\beta$ /10 min  | LAISVQE           | H3                 | 0,543743 | 0,225202 |
| 274-280 | LXR $\beta$ /10 min  | AIISVQE           | H3                 | 0,520806 | 0,229433 |
| 303-307 | LXR $\beta$ /10 min  | LKAST             | H5                 | 0,652175 | -0,22507 |
| 312-324 | LXR $\beta$ /10 min  | LLETARRYNHETE     | H5, $\beta$ sheets | 0,628957 | 0,424607 |
| 312-325 | LXR $\beta$ /10 min  | LLETARRYNHETEC    | H5, $\beta$ sheets | 0,591779 | 0,431342 |
| 346-354 | LXR $\beta$ /10 min  | VEFINPIFE         | H7                 | 0,661985 | 0,303505 |
| 349-354 | LXR $\beta$ /10 min  | INPIFE            | H7                 | 0,519429 | -0,02464 |

between high and low ABCA1 inducers (ABCA1 p(corr))



**a**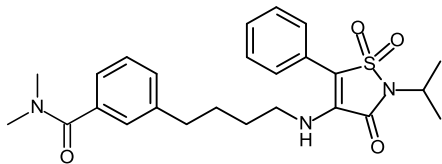**AZ1**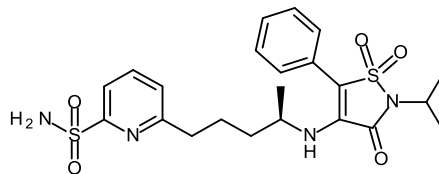**AZ2**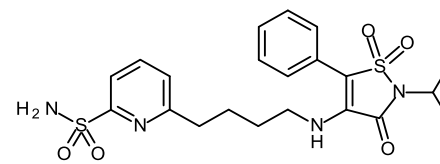**AZ3**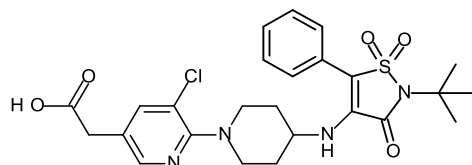**AZ4**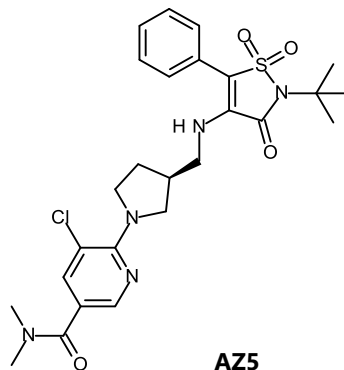**AZ5**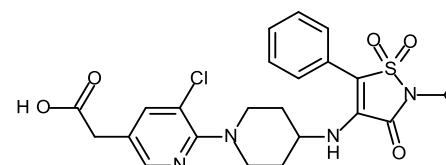**AZ6****b**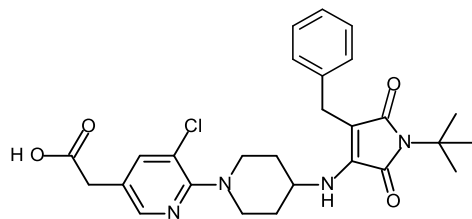**AZ7**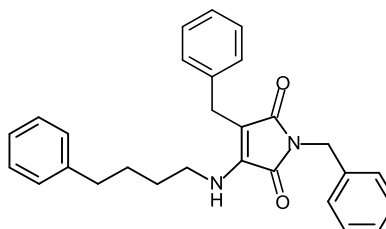**AZ8**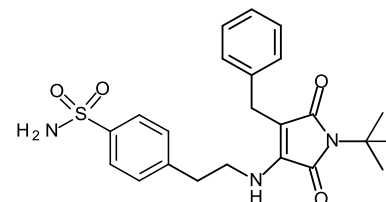**AZ9**

**Supplementary Figure 1.** Compounds used in this study and structurally related to AZ876 having (a) a central cyclic sulphone amide scaffold or (b) a maleimide core.

*Related to Figure 1*

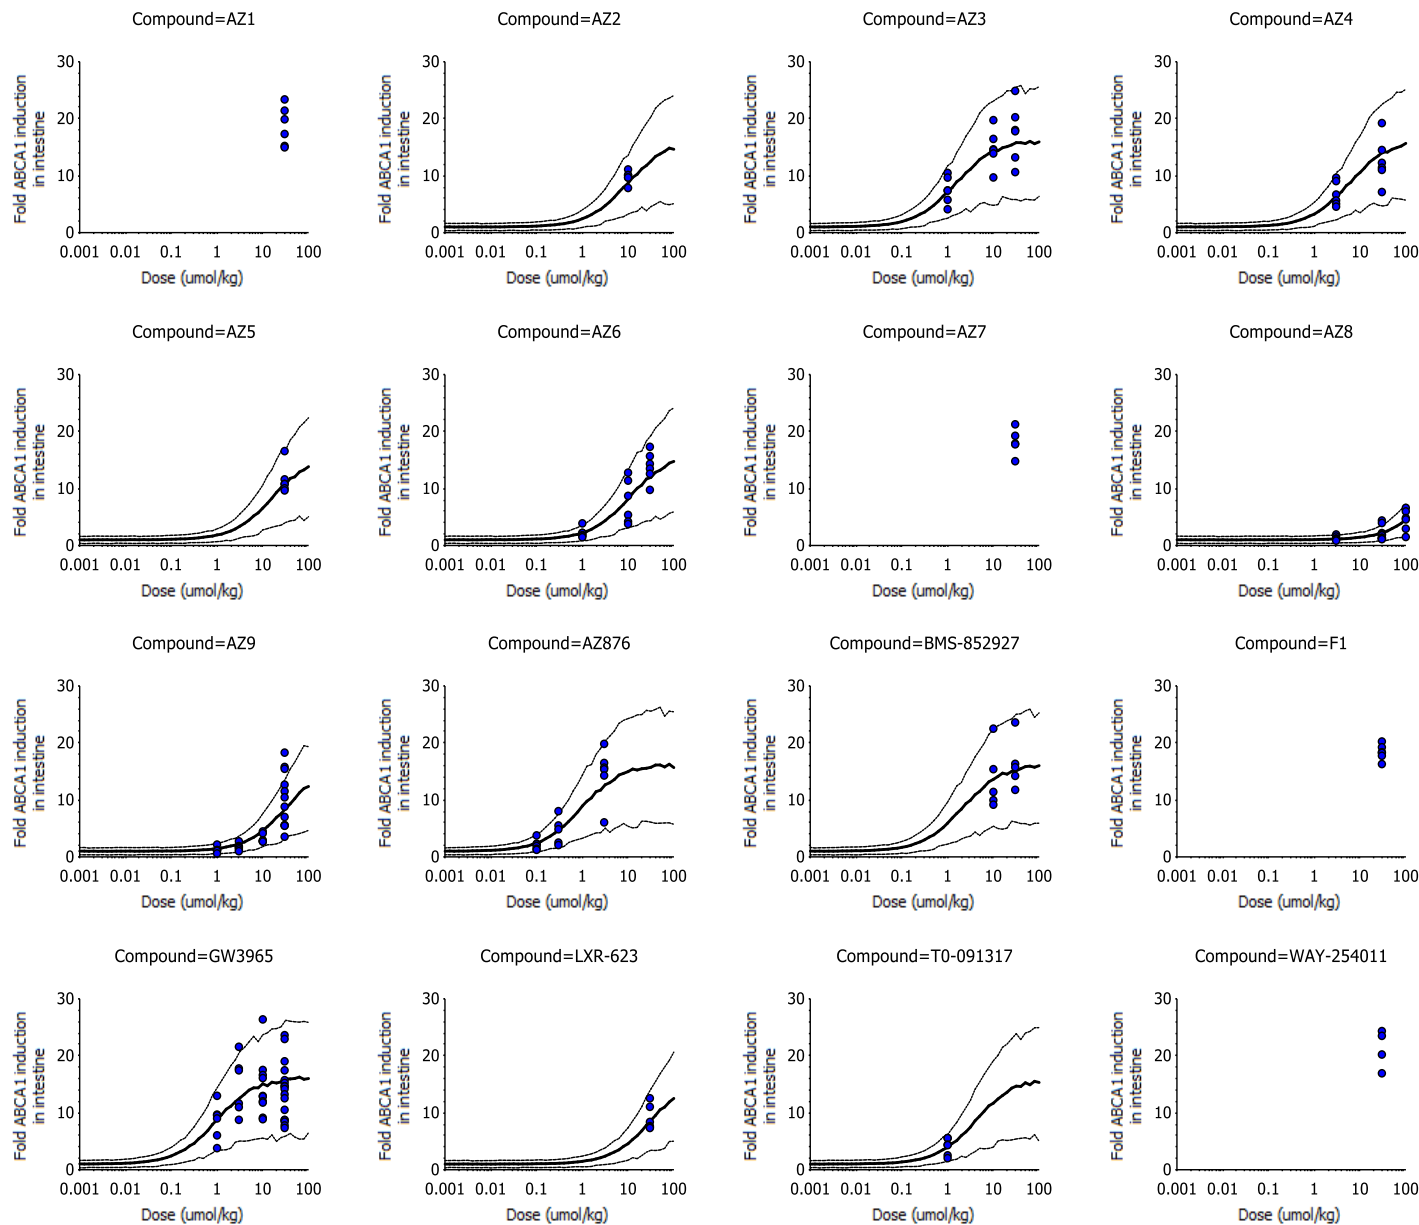

**Supplementary Figure 2.** Relationship between administered dose and drug induced intestinal *Abca1* mRNA levels. Observed individual fold *Abca1* induction (markers) and model fit (solid line: population mean, dotted lines: 90% confidence interval) of the different drugs included in the assessment. In vivo potency could not be identified for some compounds as no dose-response was available and the observed *Abca1* increase was in the range of the maximal induction ( $E_{max}$ ).

Related to Table 2

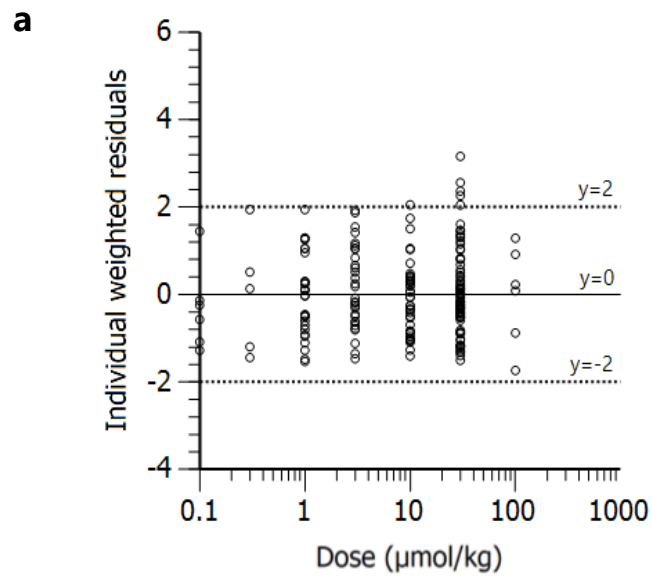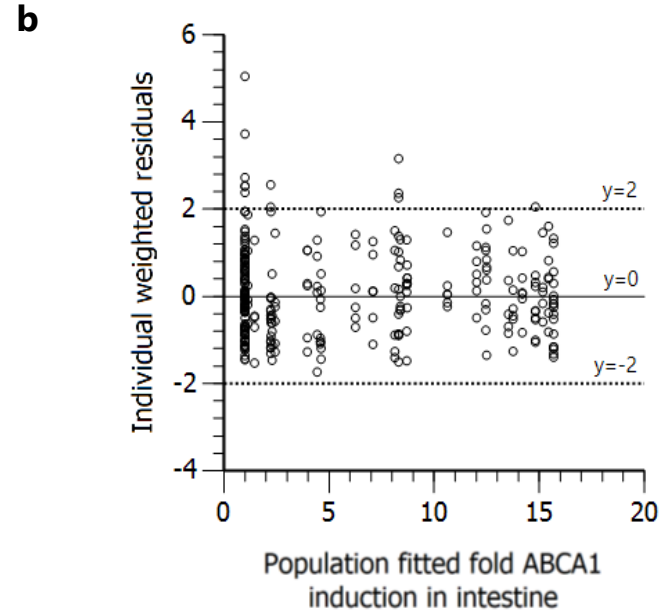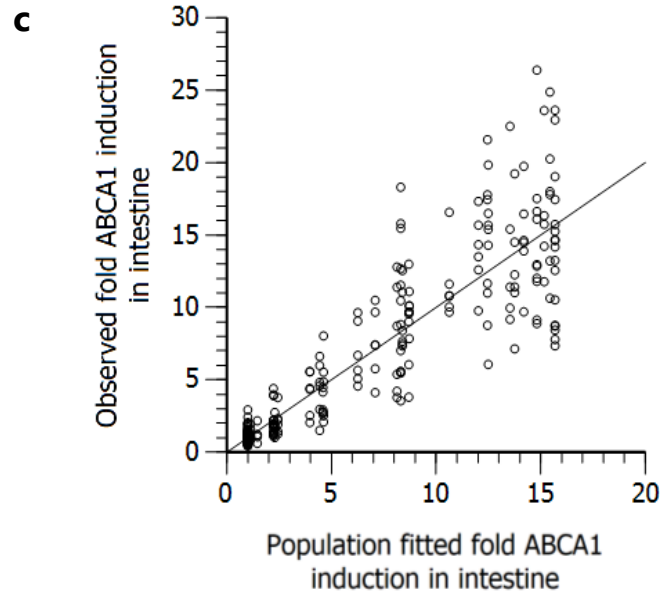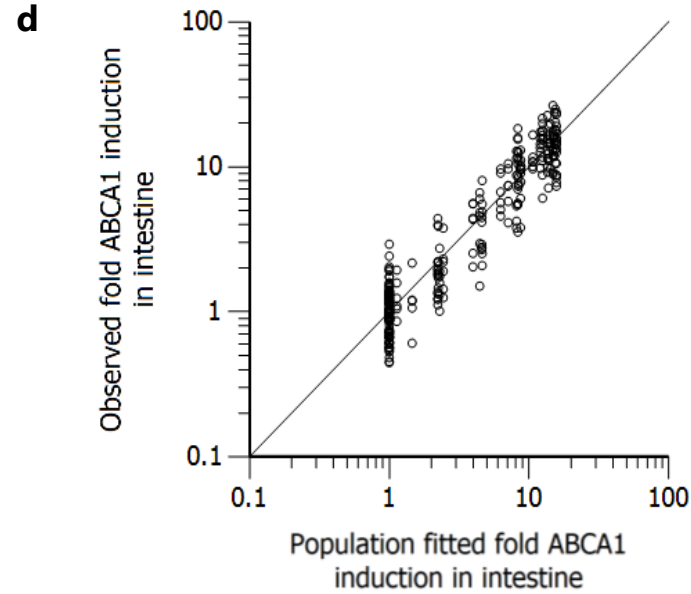

**Supplementary Figure 3.** Goodness-of-fit plots of the intestinal *Abca1* induction model. Individual weighted residuals of *Abca1* induction versus dose (a) and population fitted fold *Abca1* induction (b). Observed versus population fitted fold of *Abca1* induction on a linear (c) and logarithmic scale (d). Related to Table 2

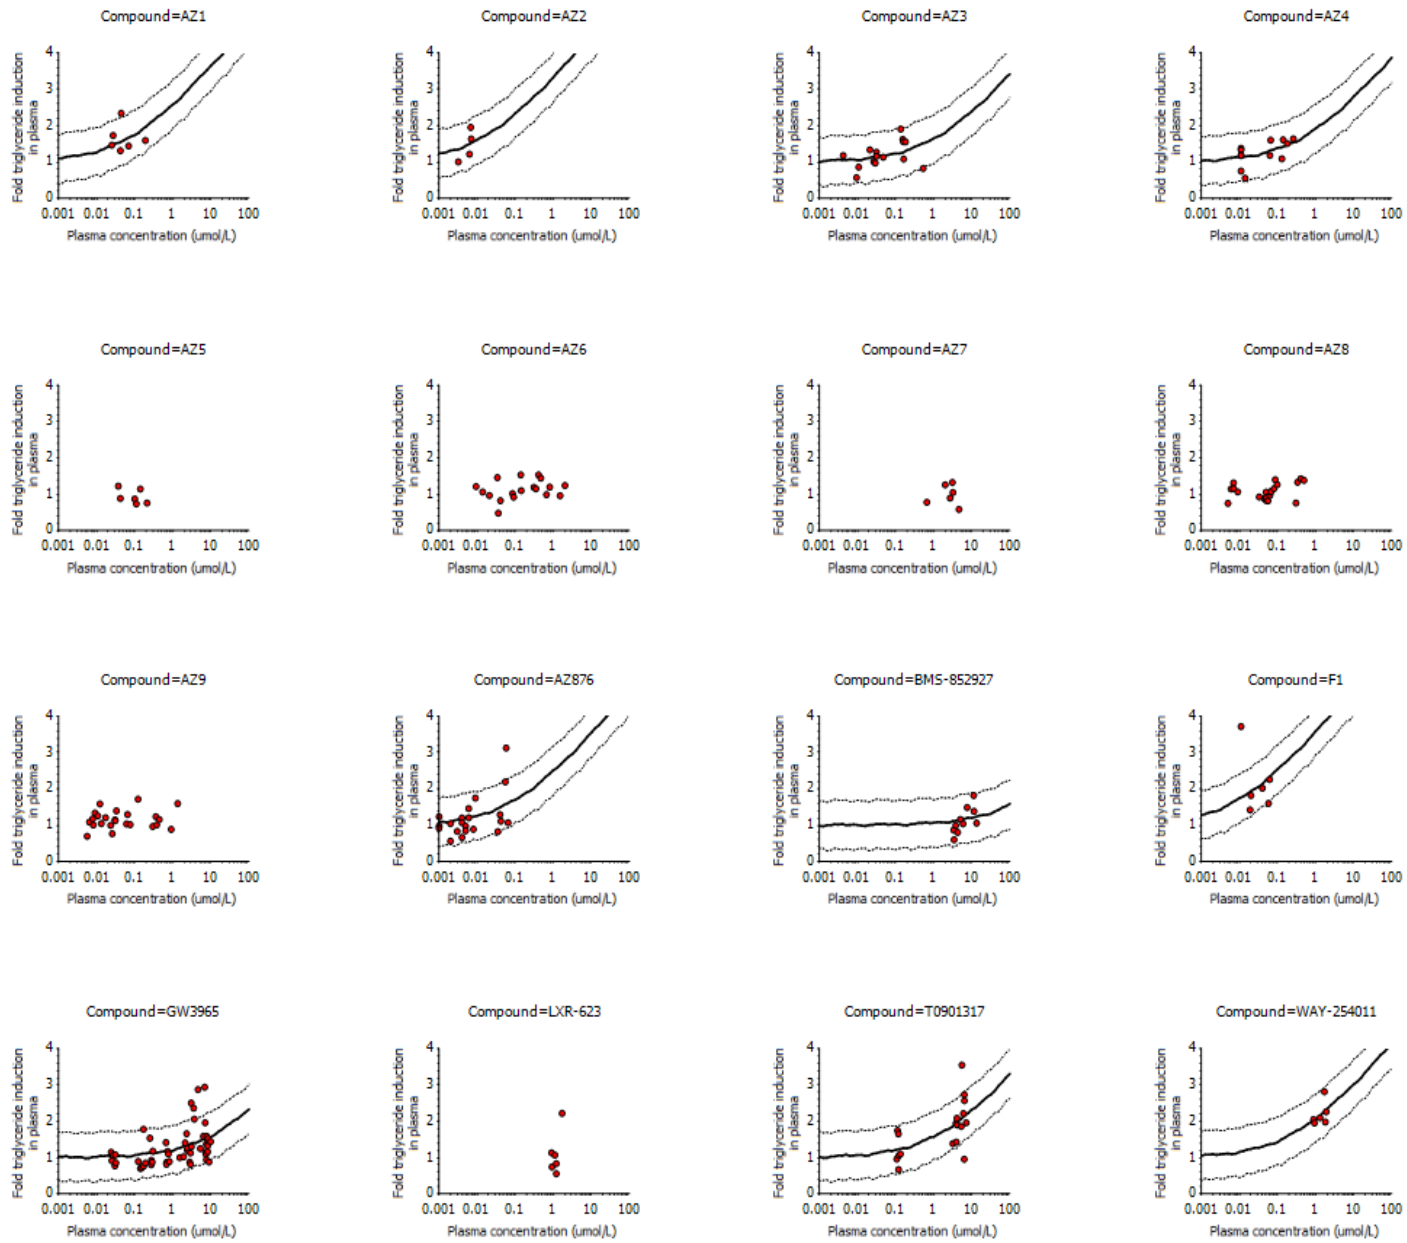

**Supplementary Figure 4.** Relationship between drug concentration in blood and plasma TG increase. Observed individual fold TG induction (markers) and model fit (solid line: population mean, and dotted lines: 90% confidence interval) of the different drugs included in the assessment. Concentration needed to generate a 2-fold induction of TG levels ( $C_2$ ) could not be identified for some compounds as no trends in increased TG levels were observed within the explored drug concentration range.

*Related to Table 2*

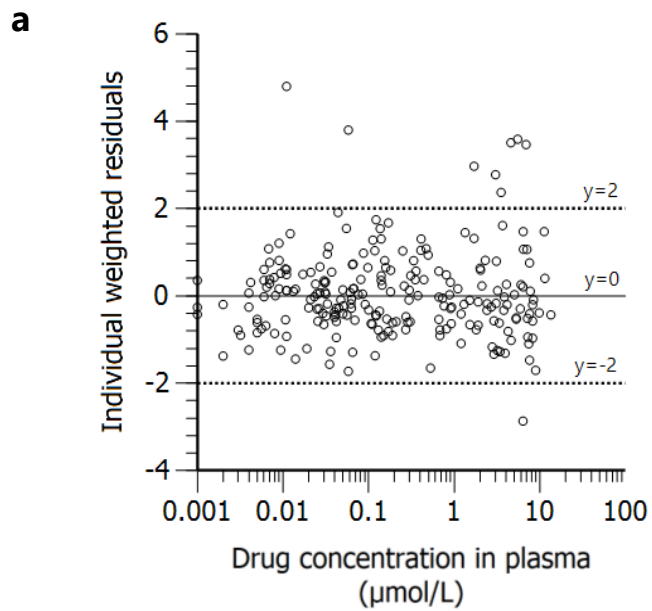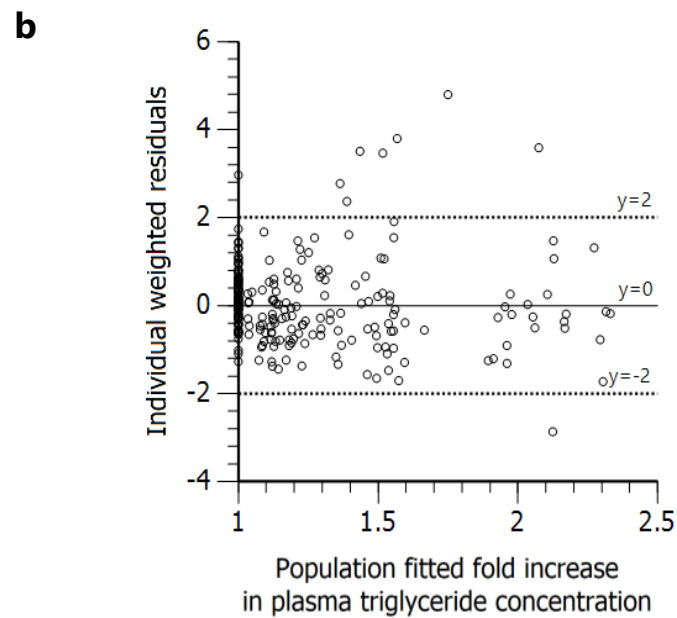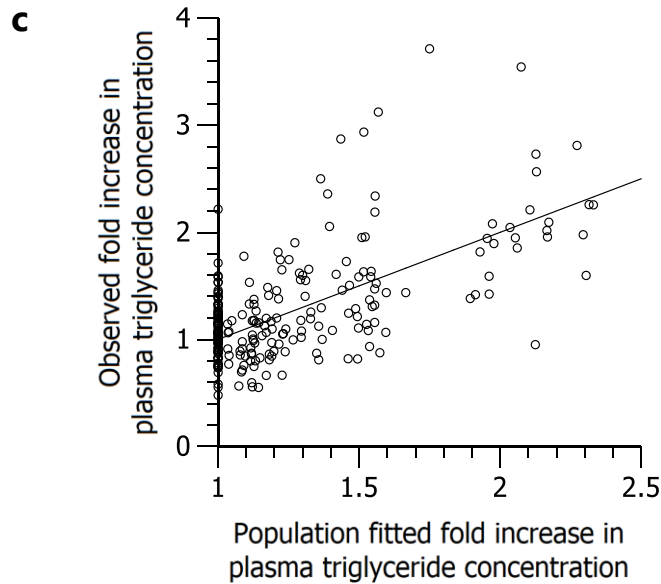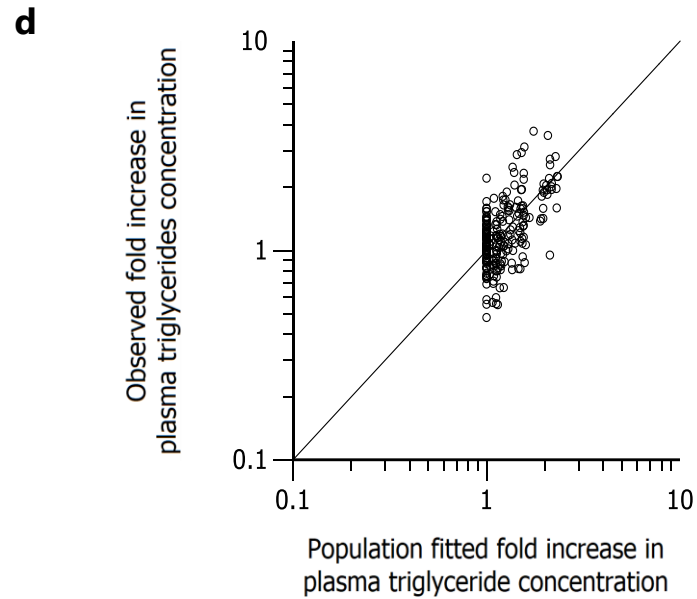

**Supplementary Figure 5.** Goodness-of-fit plots of the plasma TG model. Individual weighted residuals of TG induction *versus* drug concentration in plasma (a) and population fitted fold increase in plasma TG (b). Observed *versus* population fitted fold increase in plasma TG concentration on a linear (c) and logarithmic scale (d).

*Related to Table 2*

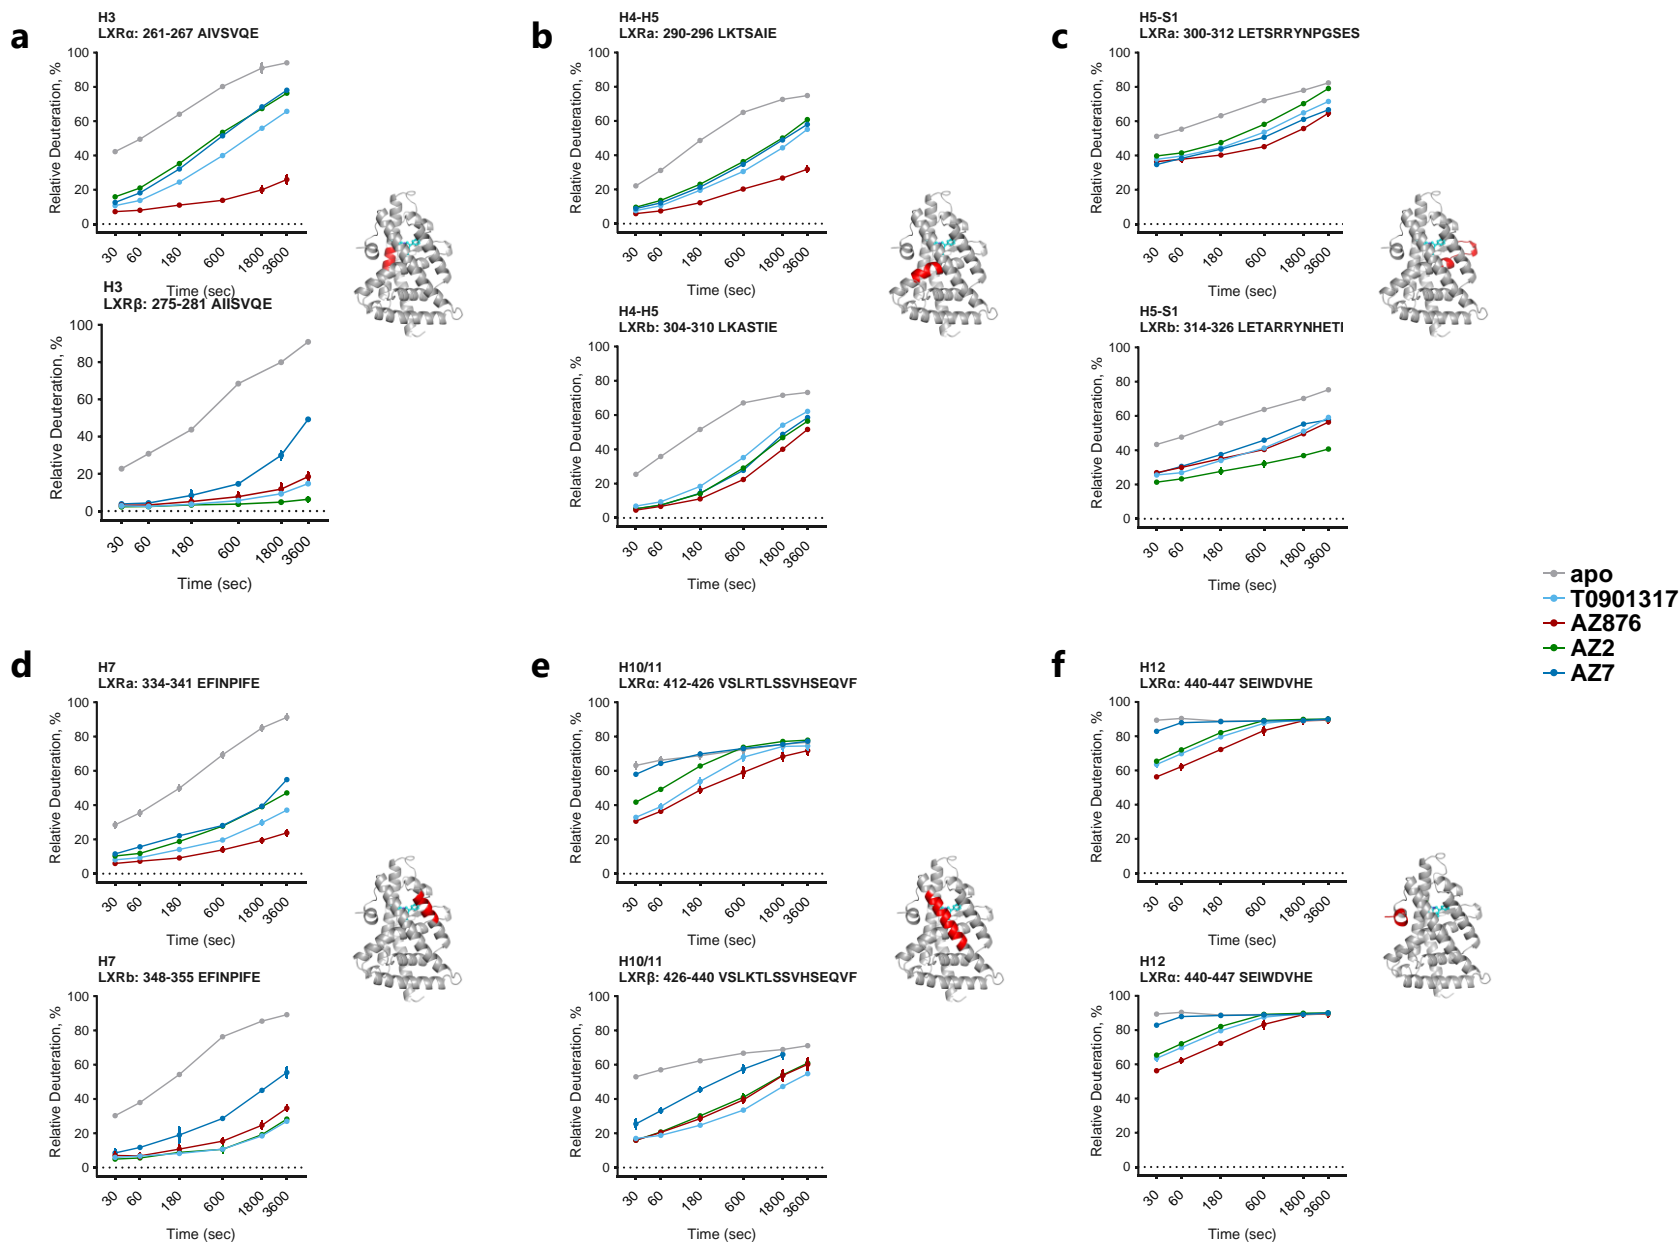

**Supplementary Figure 6.** HDX-MS kinetics of selected LXR peptides. Time point deuteration kinetics of LXR $\alpha$  and LXR $\beta$  LBDs in apo state (grey) and incubated with T0901317 (cyan), AZ876 (red), AZ2 (green) or AZ7 (blue) showing peptides from H3 (a), H4-H5 (b), H5-S1 (c), H7 (d), H10-H11 (e) and H12 (f). Peptide location within LXR LBD is mapped on the LXR $\beta$  crystal structure (1PQC.pdb). HDX-MS data were collected in triplicate, and deuteration data are normalized to the fully deuterated control ( $\pm$  standard deviation).

*Related to Figure 2*

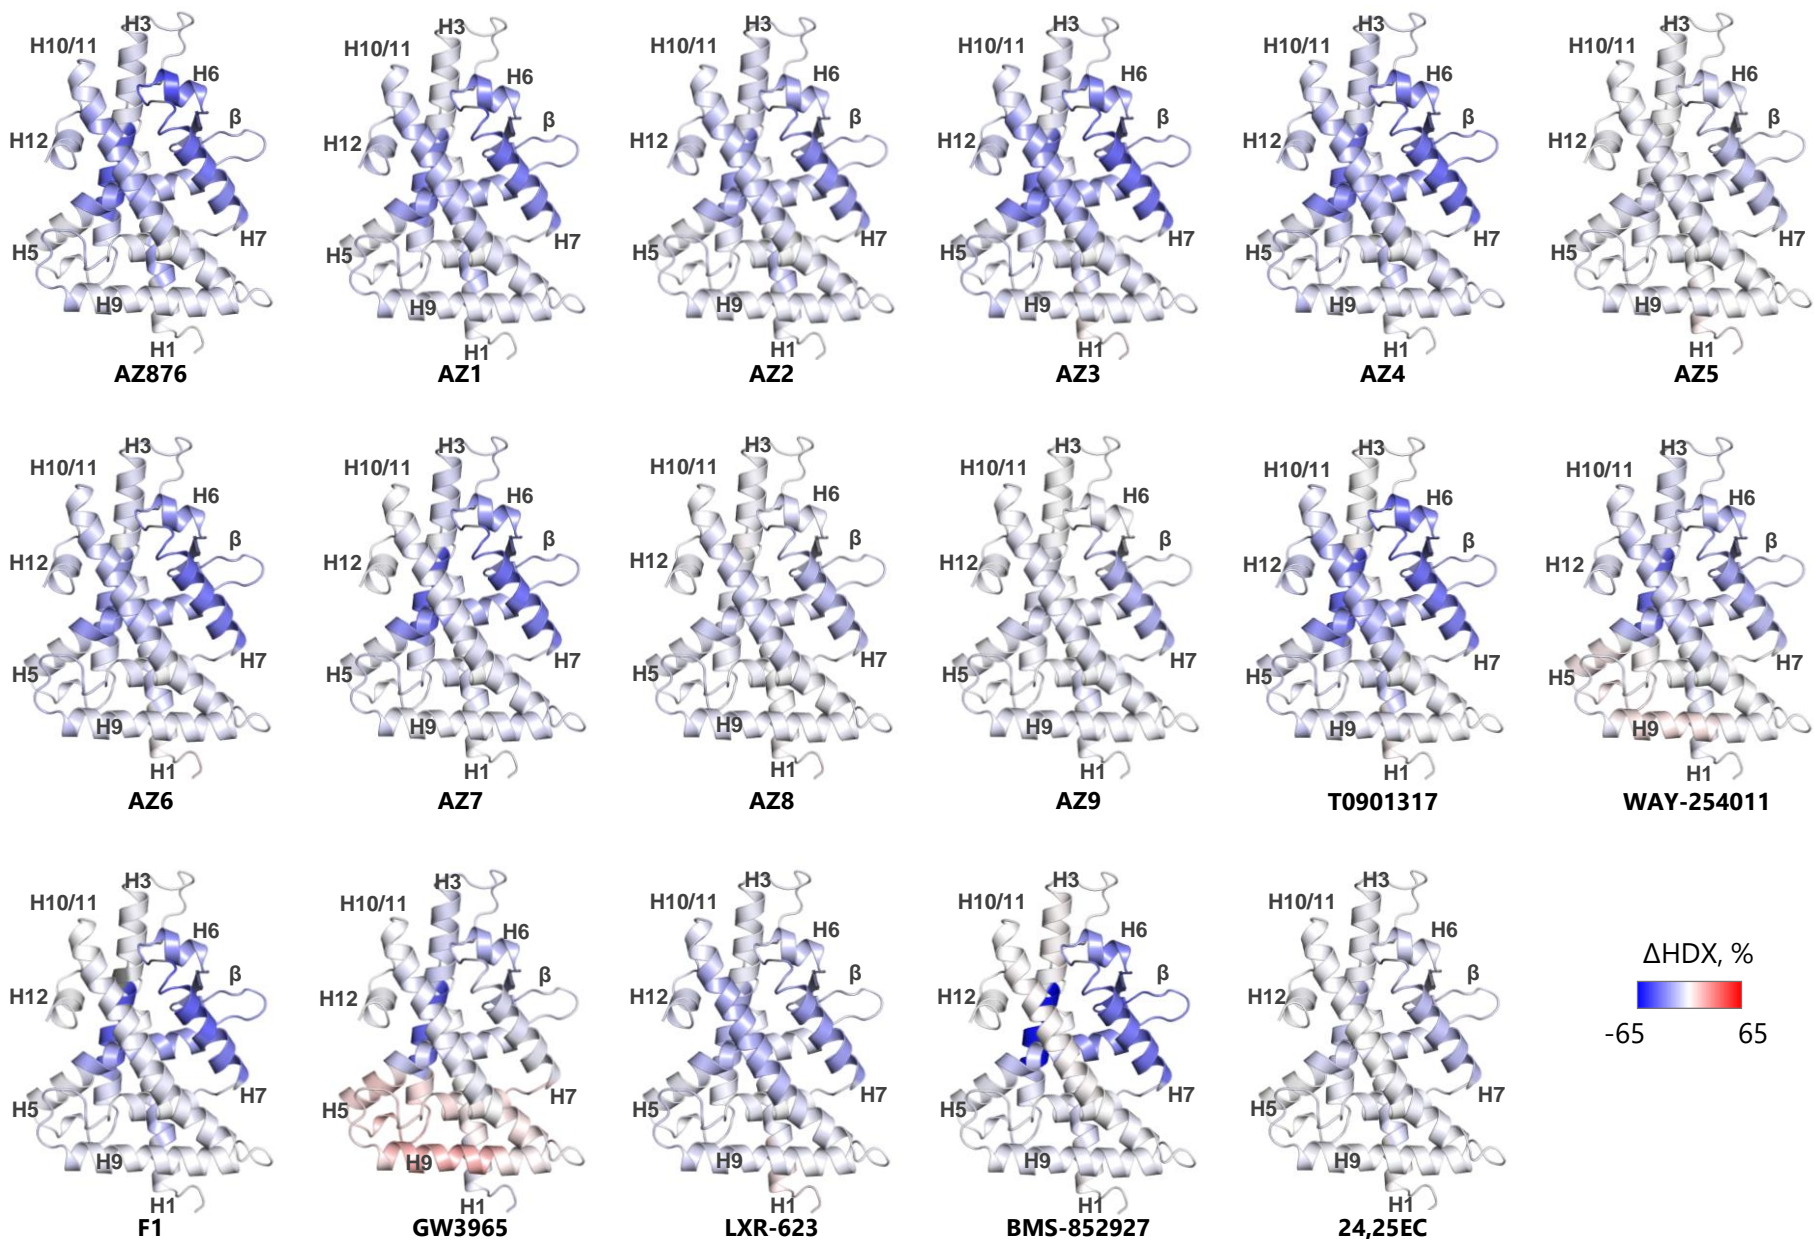

**Supplementary Figure 7.** Differential HDX-MS analysis of LXR $\alpha$ -ligand interactions. Protection from deuterium exchange upon ligand binding mapped onto LXR $\alpha$  crystal structure (2ACL.pdb), differential HDX levels are the average of two time points (30 and 600 sec). A negative difference value corresponds to a protection from deuterium uptake upon ligand binding, with large absolute values corresponding to a strong effect. Deuterium uptake values for all peptides were corrected to back exchange using the fully deuterated control. HDX-MS measurements were performed in triplicates.

*Related to Figure 2*

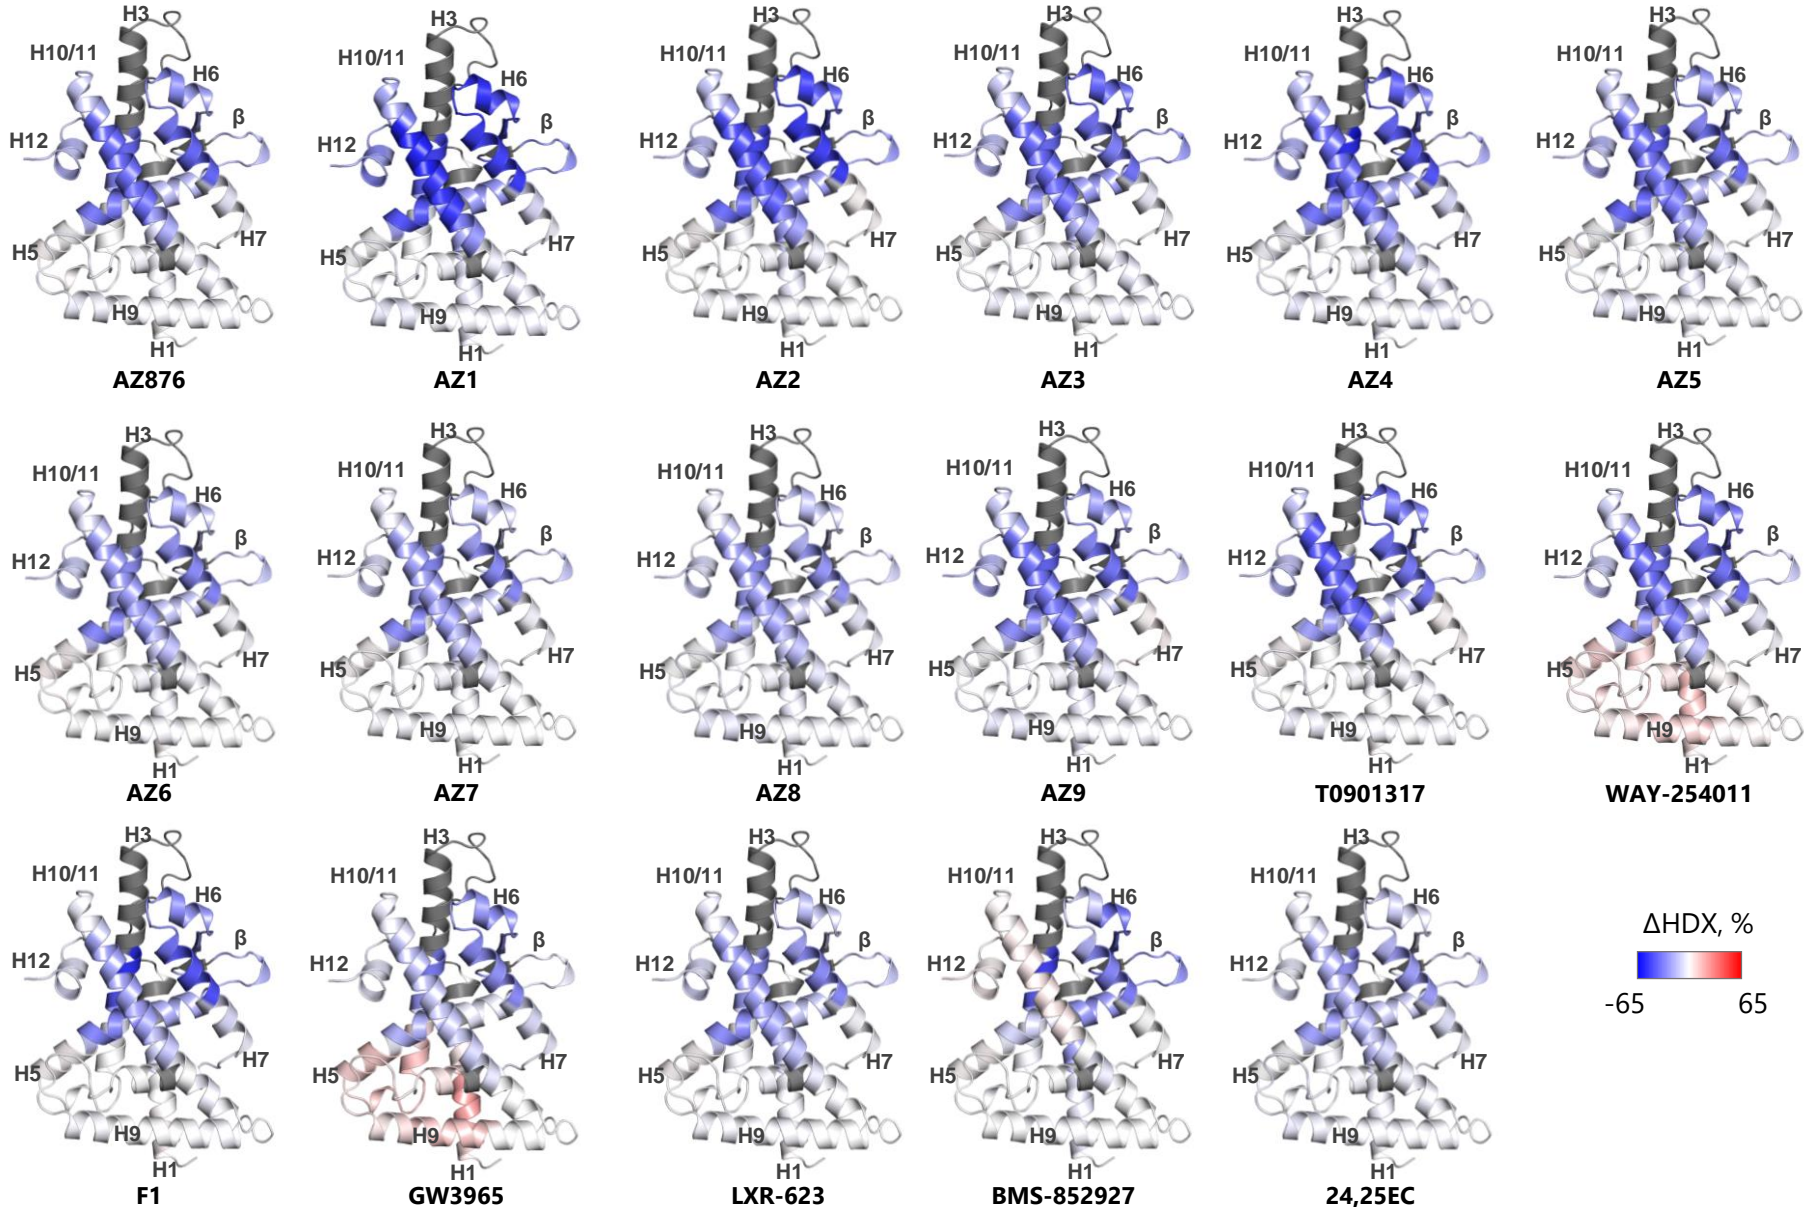

**Supplementary Figure 8.** Differential HDX-MS analysis of LXRβ-ligand interactions. Protection from deuterium exchange upon ligand binding mapped onto LXRβ crystal structure (1PQC.pdb), differential HDX levels are the average of two time points (30 and 600 sec). A negative difference value corresponds to a protection from deuterium uptake upon ligand binding, with large absolute values corresponding to a strong effect. Deuterium uptake values for all peptides were corrected to back exchange using the fully deuterated control. Regions of the LXRβ structure not covered by HDX-MS are shown in dark grey. HDX-MS measurements were performed in triplicates.

*Related to Figure 2*



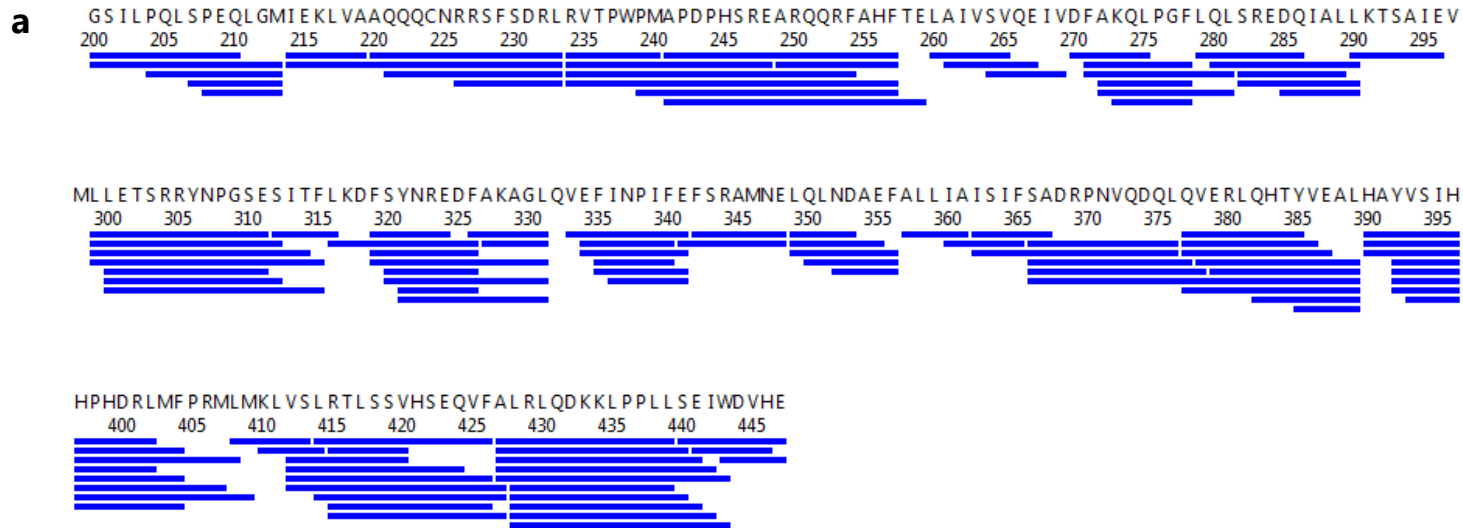

Total: 112 Peptides, 98.8% Coverage, 4.94 Redundancy

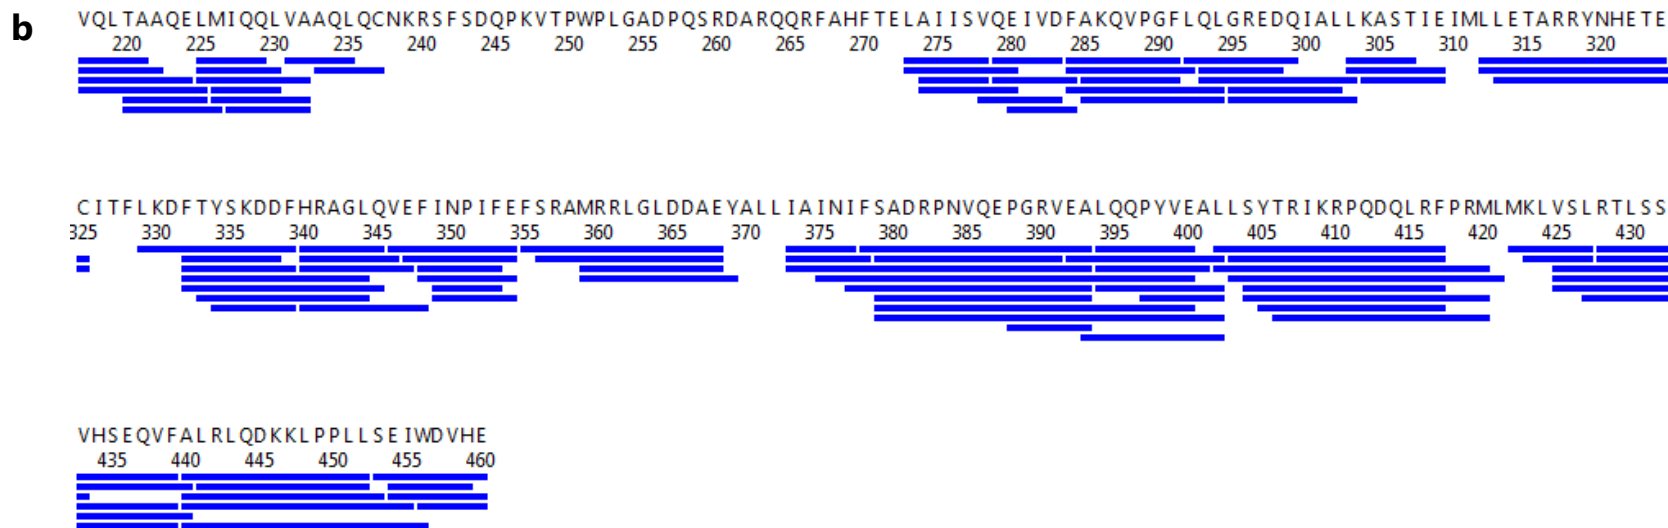

Total: 102 Peptides, 83.7% Coverage, 4.65 Redundancy

**Supplementary Figure 9.** Sequence coverage achieved in the HDX-MS experiment. The peptides obtained via peptic digestion and LC-MS analysis are shown as blue bars along the protein sequence for LXR $\alpha$  (a) and LXR $\beta$  (b) LBDs.

*Related to Figure 2*

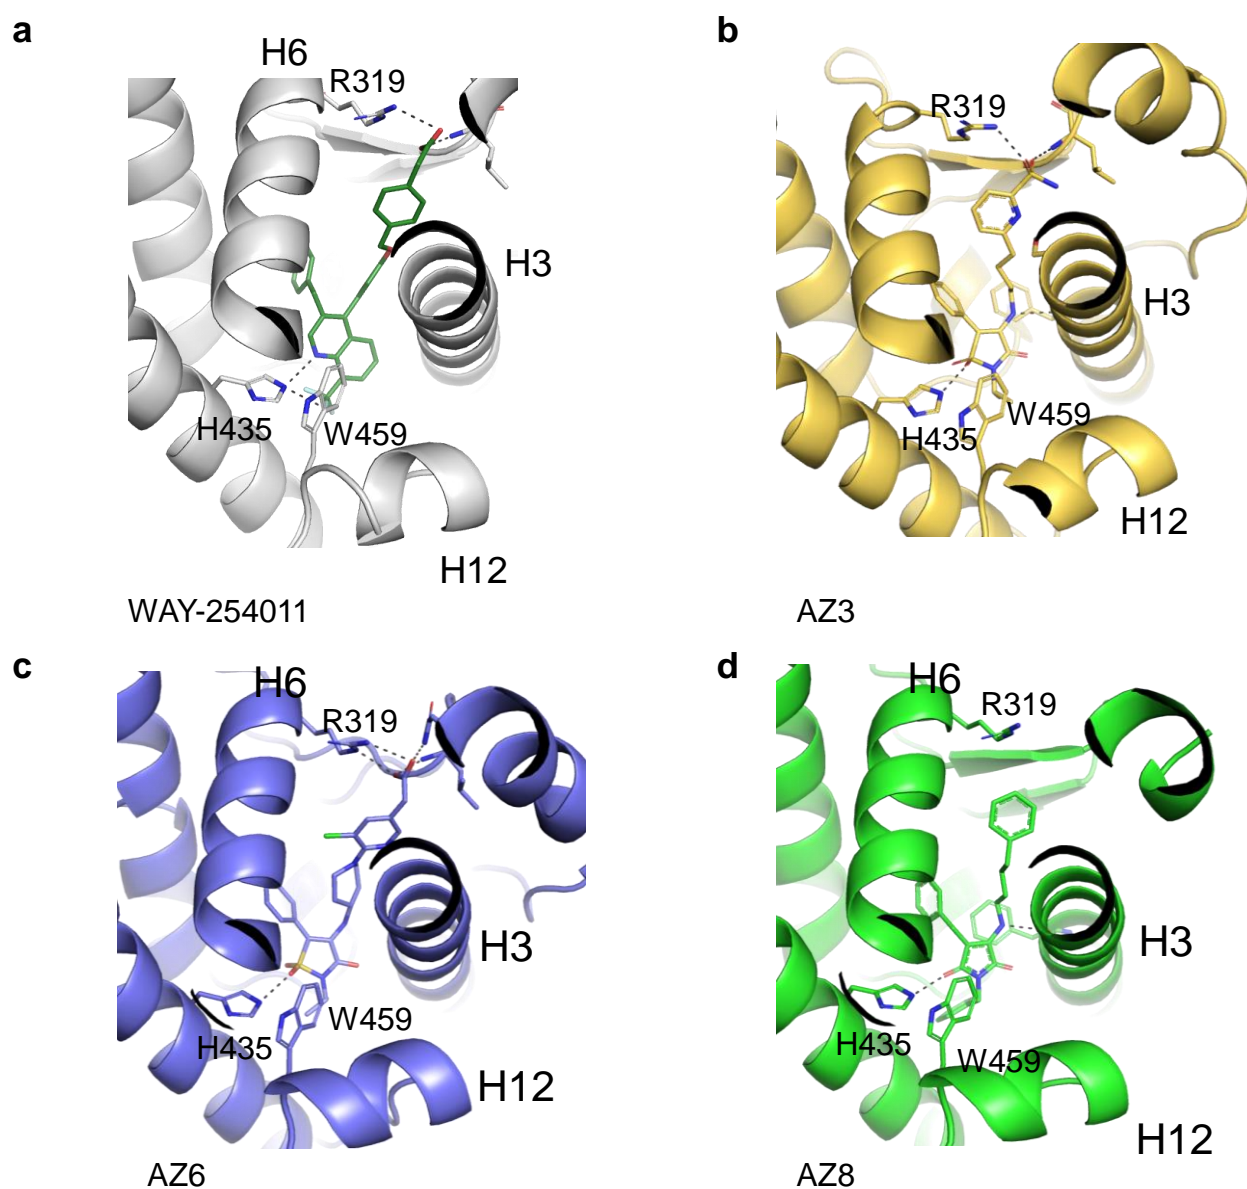

**Supplementary Figure 10.** Binding modes of WAY-254011 (a), AZ3 (b), AZ6 (c) and AZ8 (d) to LXR $\beta$ . In the LXR $\beta$  complexes, AZ3, AZ6 and AZ8 bind in a similar manner with the cyclic sulfonamide or maleimide core wedged between H3, H11 and H12, and the sulfone or carbonyl forming a hydrogen bond to His435. The phenyl (AZ3 and AZ6) and benzyl (AZ8) groups fill the pocket between H6 and H8, and form hydrophobic interactions with residues from H8, H6, H7 and H3. The nitrogen in the linker forms a hydrogen bond to the main chain carbonyl of Phe271 in helix H3. The linker is stacking against H3. The polar substituents at the end of the linker are within hydrogen bonding distance to Arg319 and the main chain nitrogen of Leu330.

*Related to Figure 2*

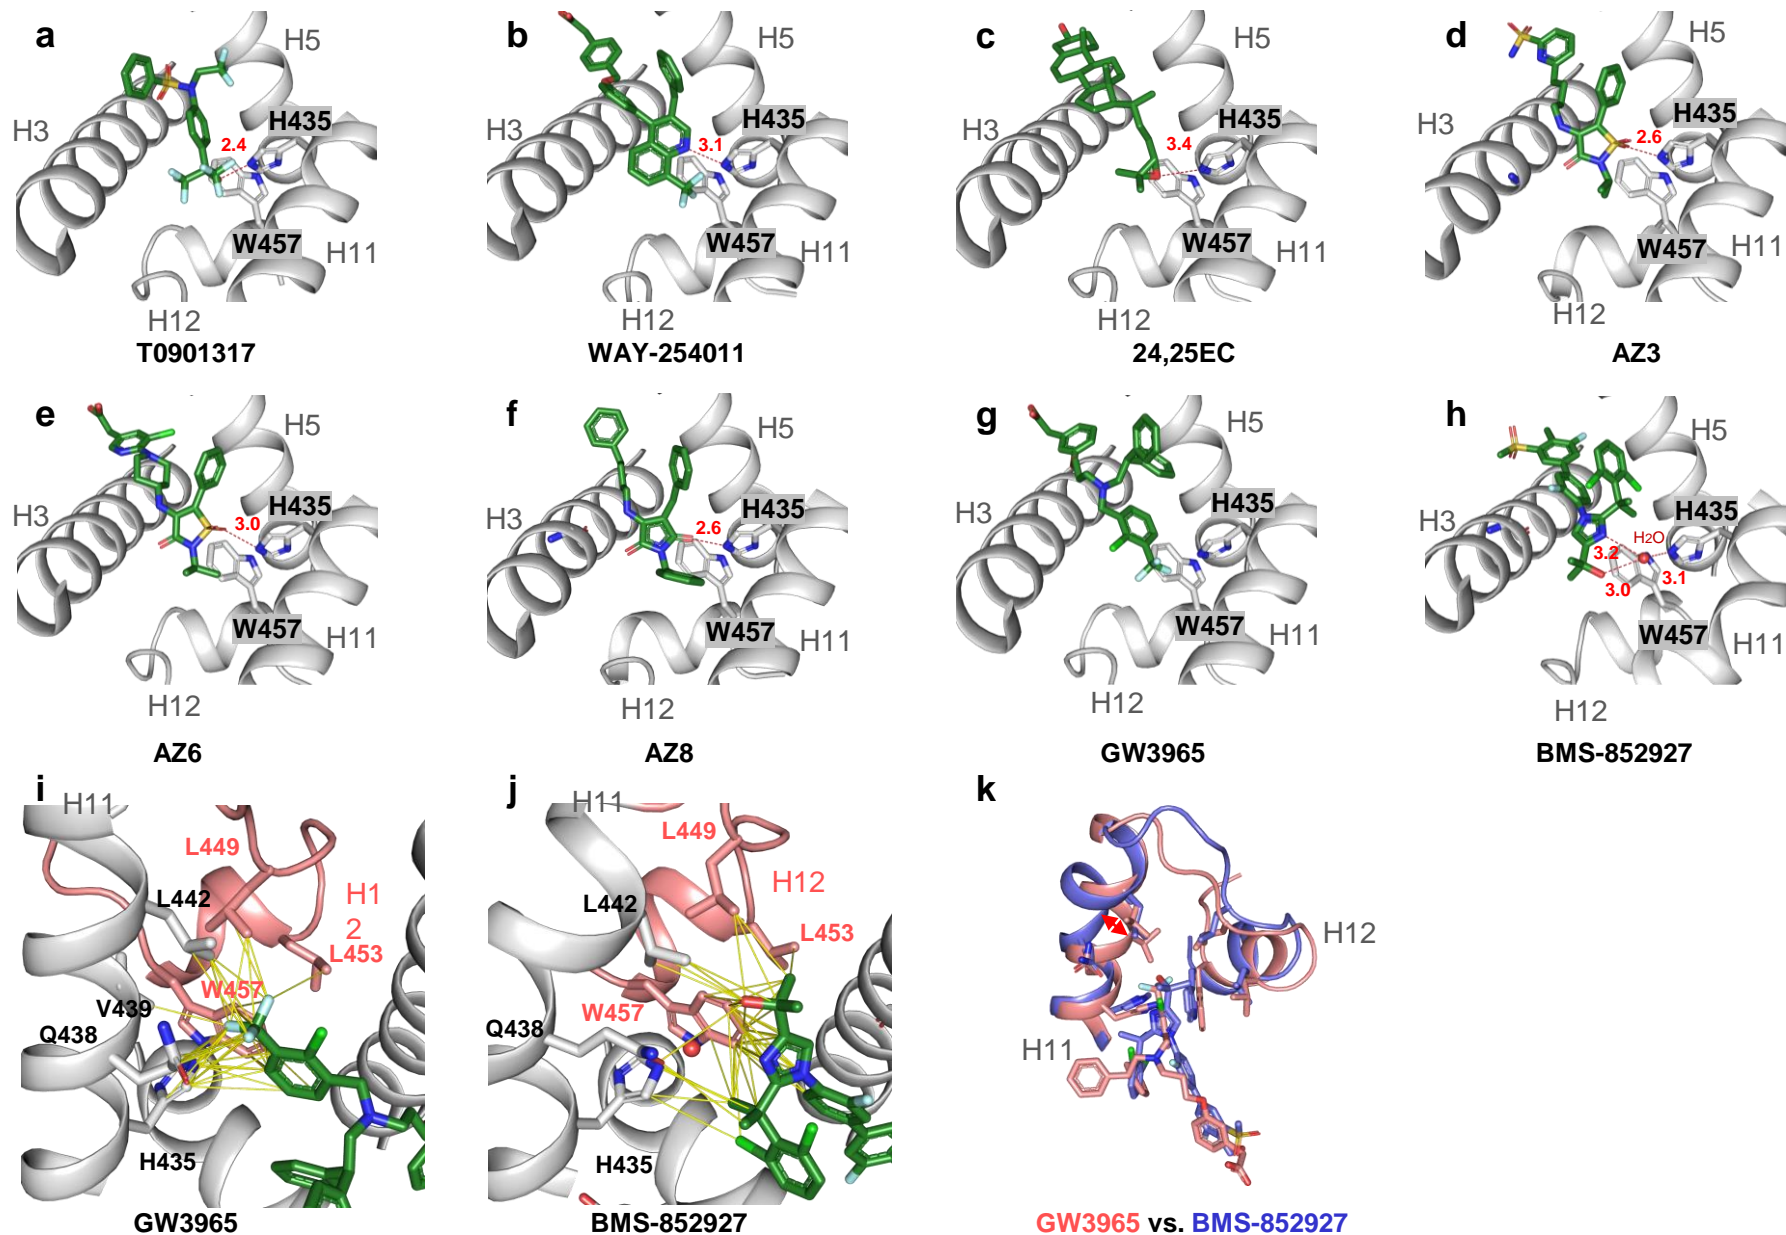

**Supplementary Figure 11.** Stabilization of the LXR $\beta$  His435-Trp457 activation switch by LXR ligands. (a) TO-091317 (PDB ID: 1PQC), (b) WAY-254011, (c) 24,25EC (PDB ID: 1P8D), (d) AZ3, (e) AZ6, (f) AZ8, (g) GW3965 (PDB ID: 1PQ6), and (h) BMS-852927 (PDB ID: 5JY3). Hydrogen bonds are shown in red dash lines. Interactions between GW3965 (i) or BMS-852927 (j) and residues of LXR $\beta$  H11-H12 at 4.5 Å cutoff shown in yellow. (k) In BMS-852927/LXR $\beta$  complexes H11 is shifted away from the ligand by 3.5 Å which leads to the loss or weakening of the interactions.

*Related to Figure 2*

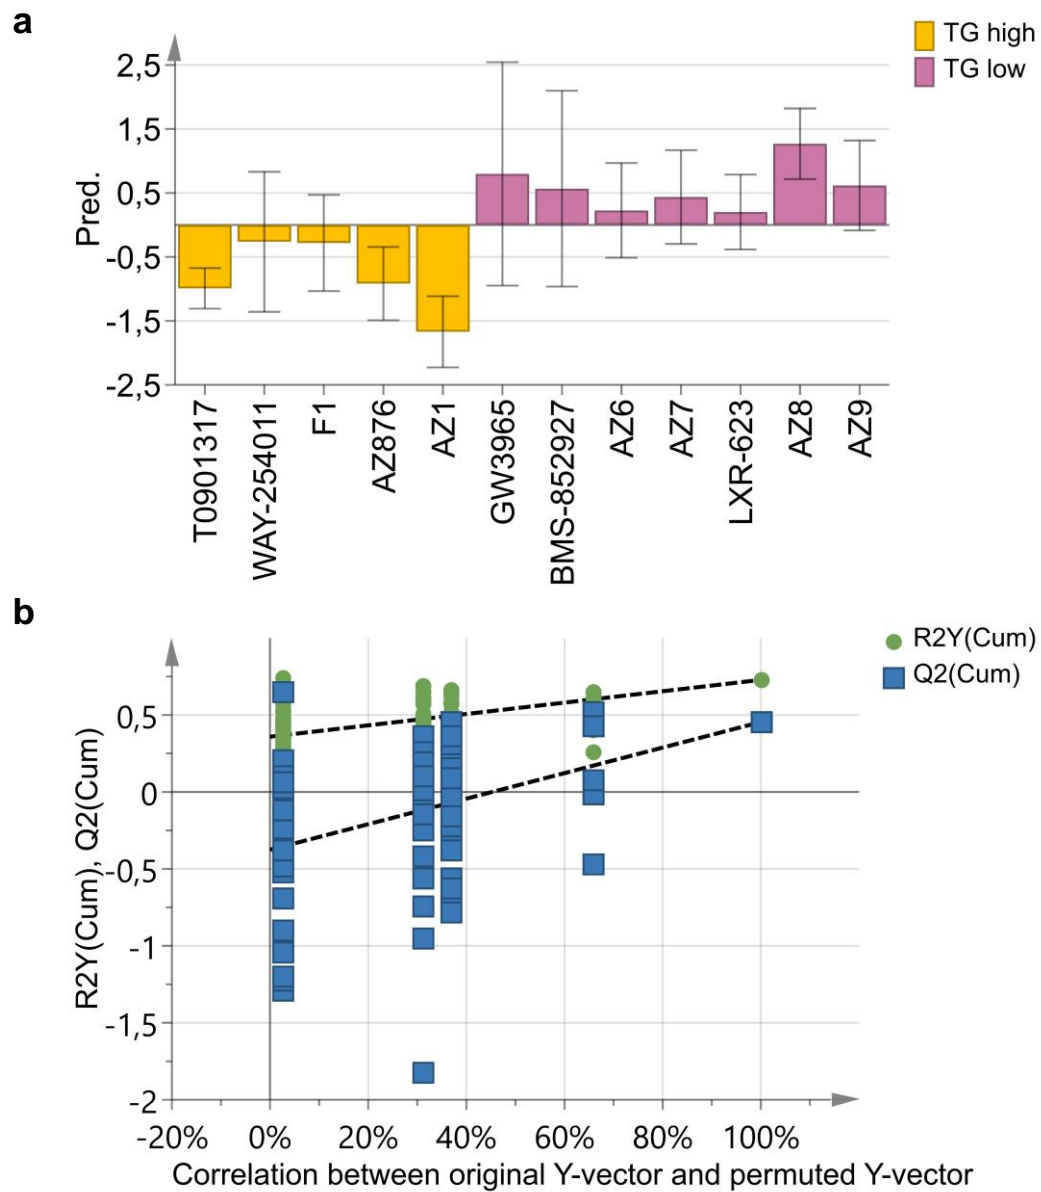

**Supplementary Figure 12.** OPLS-DA model of TG effects based on LXR $\alpha$ /LXR $\beta$  HDX-MS data. OPLS-DA score plot (a) showing the degree of separation of the model between lipogenic (yellow) and non-lipogenic (purple) compounds (N = 12, R2X(cum) = 26.9%, R2Y(cum) = 72.8%, Q2(cum) = 45.4%, P-value = 0,066) and permutation plot of the OPLS-DA model (b). A permutation test performed with 100 random permutations in an OPLS-DA model showing R2 (green circles) and Q2 (blue boxes) values from the permuted analysis (bottom left) significantly lower than the corresponding original values (top right).

*Related to Figure 3*

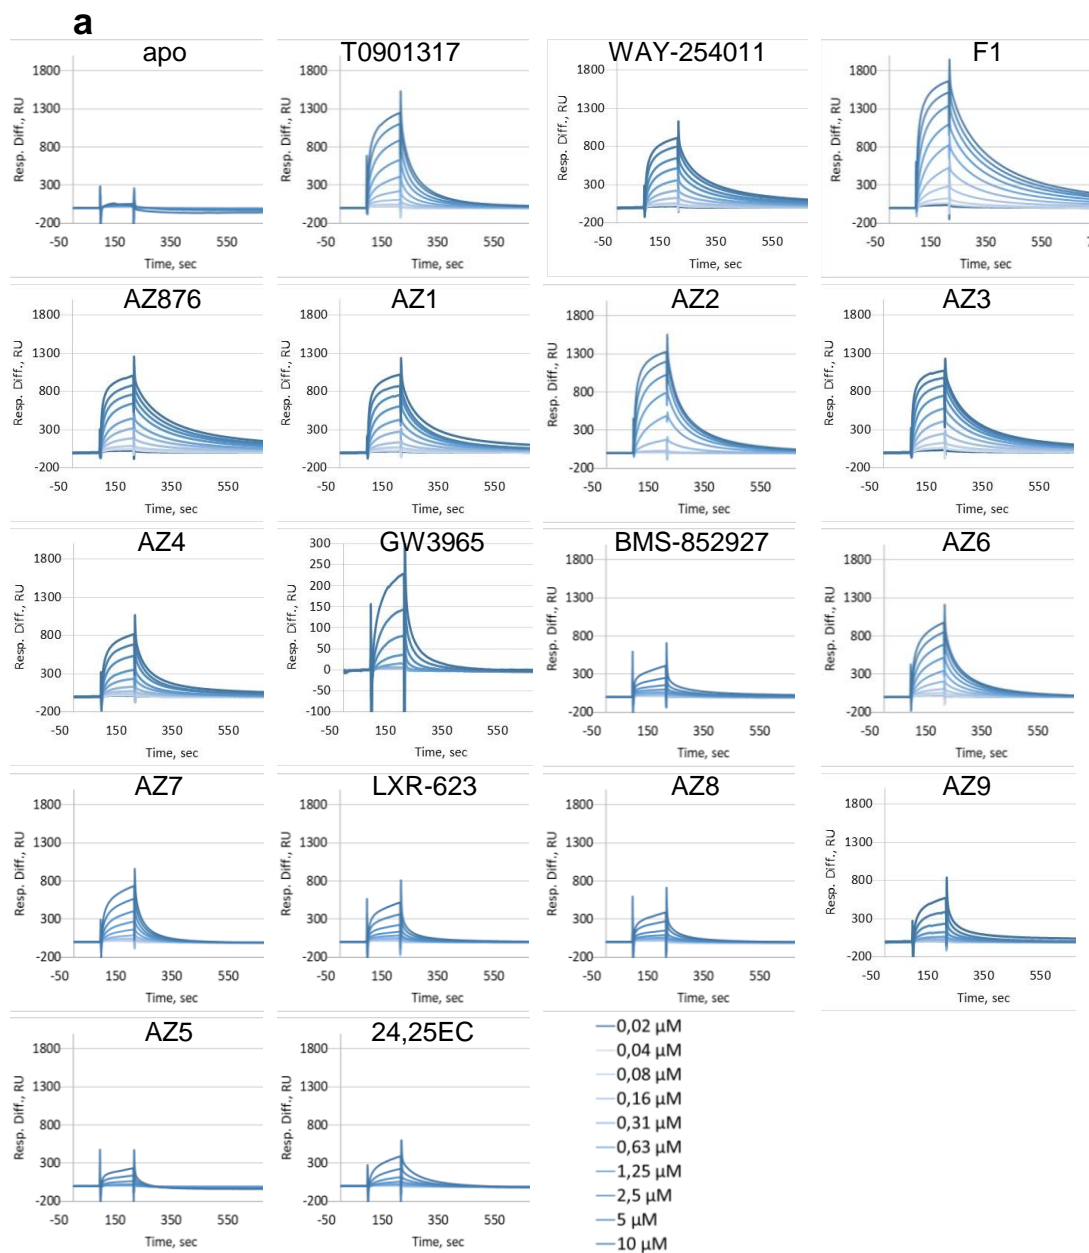

**b**

| LXRα/SRC1  | pKd   | SE pKd | Kd, μM |
|------------|-------|--------|--------|
| T0901317   | 5,823 | 0,015  | 1,50   |
| WAY-254011 | 5,875 | 0,038  | 1,33   |
| F1         | 6,132 | 0,023  | 0,74   |
| AZ876      | 6,036 | 0,046  | 0,92   |
| AZ1        | 5,975 | 0,053  | 1,06   |
| AZ2        | 6,003 | 0,031  | 0,99   |
| AZ3        | 6,21  | 0,028  | 0,62   |
| AZ4        | 5,628 | 0,024  | 2,35   |
| GW3965     | 5,184 | 0,055  | 6,55   |
| BMS-852927 | 4,974 | 0,069  | 10,61  |
| AZ6        | 5,823 | 0,022  | 1,50   |
| AZ7        | 5,347 | 0,033  | 4,49   |
| LXR-623    | 4,667 | 0,186  | 21,52  |
| AZ8        | 4,594 | 0,381  | 25,47  |
| AZ9        | 5,143 | 0,029  | 7,19   |
| AZ5        | 4,96  | 0,175  | 10,97  |
| 24,25EC    | 5,03  | 0,075  | 9,33   |

**Supplementary Figure 13.** SPR analysis of ligand-induced LXRα/SRC1 interactions. Obtained response curves (a) are shown in the 0.02 – 10 μM concentration range of LXRα. (b) Equilibrium binding affinity parameters derived from fitting the steady-state region of the sensorgram data to nonlinear regression.

*Related to Figure 3*

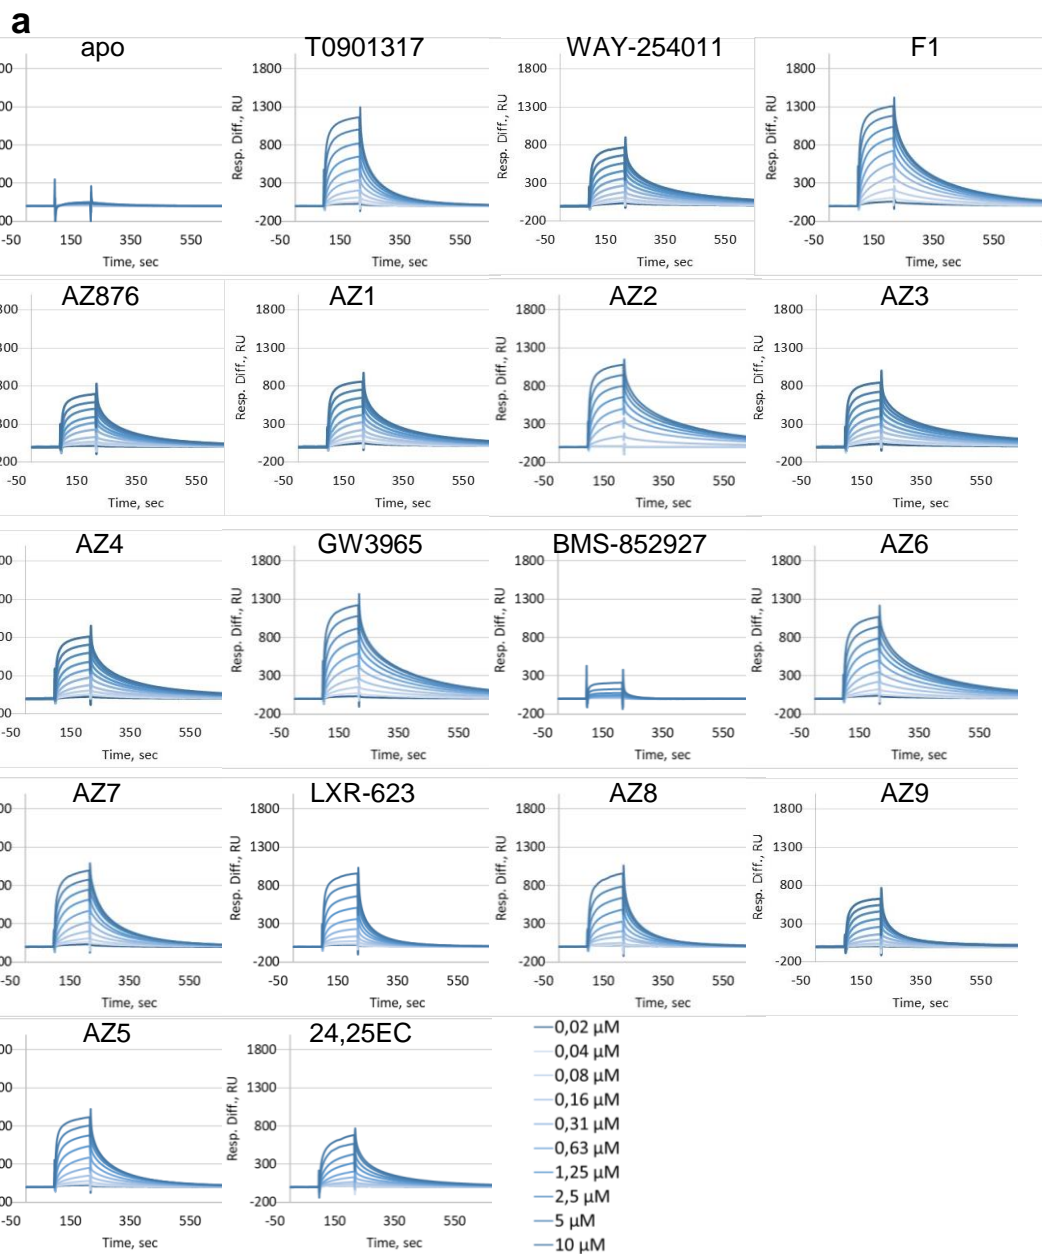

**b**

| LXR $\beta$ /SRC1 | pKd   | SE pKd | Kd, $\mu\text{M}$ |
|-------------------|-------|--------|-------------------|
| T0901317          | 5,807 | 0,059  | 1,56              |
| WAY-254011        | 5,863 | 0,073  | 1,37              |
| F1                | 6,205 | 0,060  | 0,62              |
| AZ876             | 5,881 | 0,101  | 1,32              |
| AZ1               | 5,926 | 0,079  | 1,19              |
| AZ2               | 6,063 | 0,082  | 0,86              |
| AZ3               | 5,880 | 0,088  | 1,32              |
| AZ4               | 5,904 | 0,069  | 1,25              |
| GW3965            | 6,012 | 0,065  | 0,97              |
| BMS-852927        | 4,704 | 0,453  | 19,77             |
| AZ6               | 5,965 | 0,057  | 1,08              |
| AZ7               | 5,988 | 0,046  | 1,03              |
| LXR-623           | 5,761 | 0,045  | 1,73              |
| AZ8               | 5,711 | 0,062  | 1,94              |
| AZ9               | 5,923 | 0,040  | 1,19              |
| AZ5               | 5,925 | 0,032  | 1,19              |
| 24,25EC           | 5,596 | 0,034  | 2,53              |

Supplementary Figure 14. SPR analysis of ligand-induced LXR $\beta$ /SRC1 interactions. Obtained response curves (a) are shown in the 0.02 – 10  $\mu\text{M}$  concentration range of LXR $\beta$ . (b) Equilibrium binding affinity parameters derived from fitting the steady-state region of the sensorgram data to nonlinear regression.

Related to Figure 3

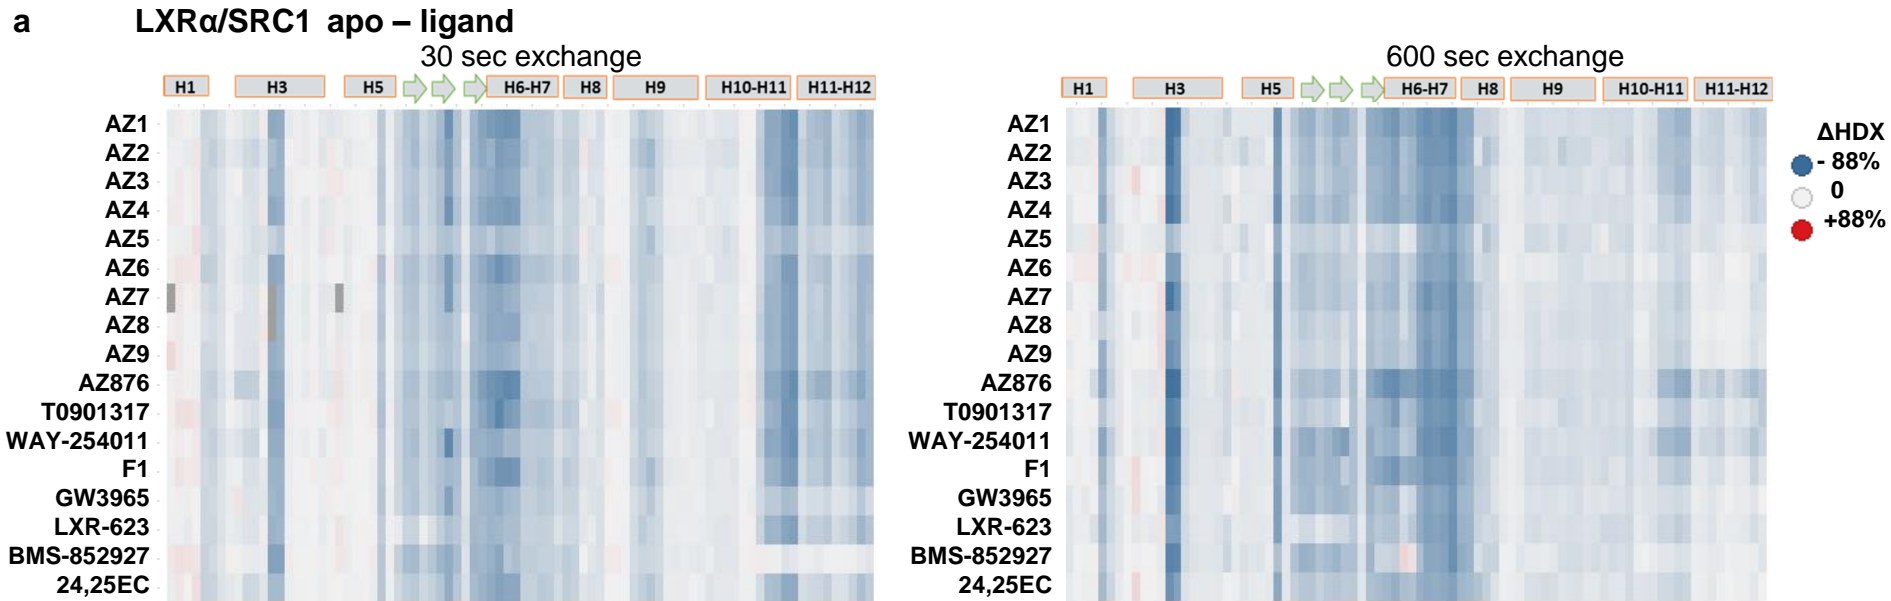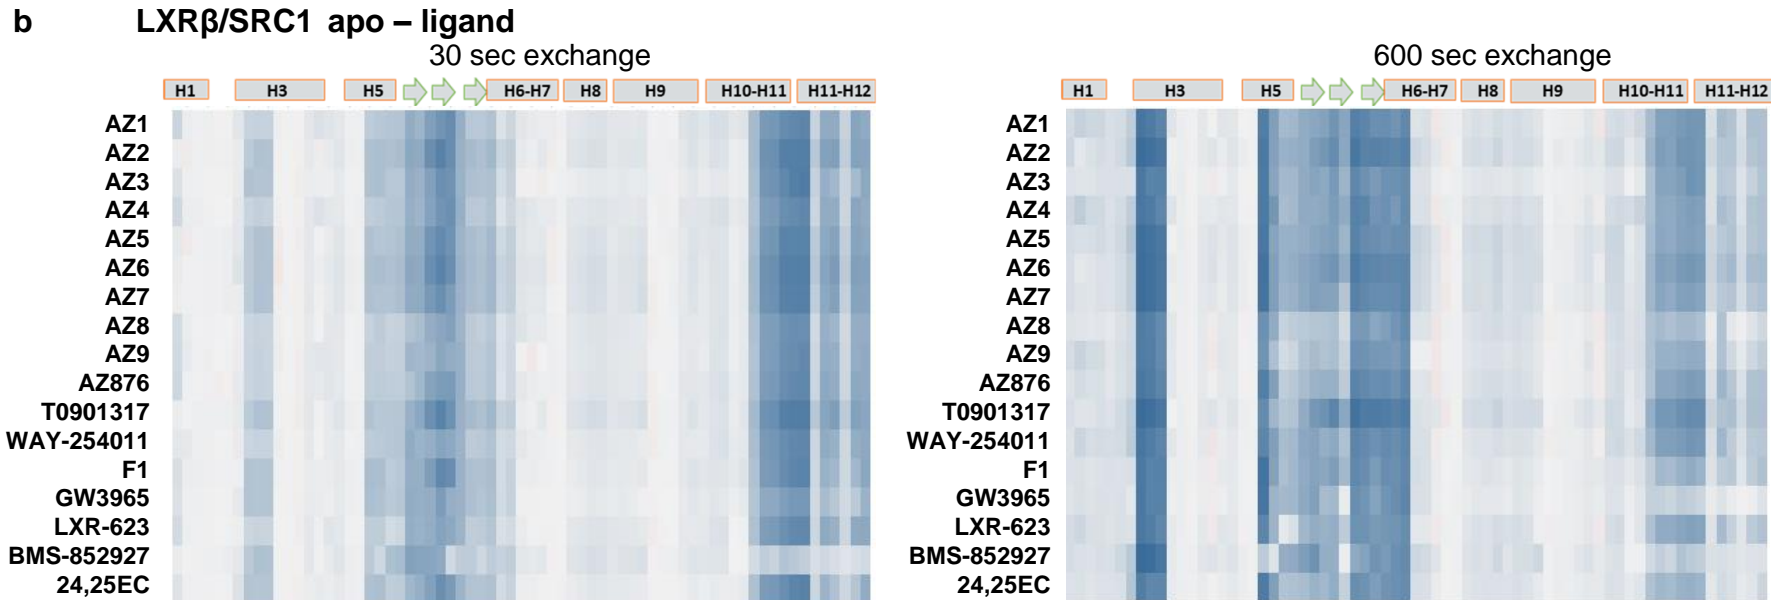

**Supplementary Figure 15.** Fractional uptake difference heatmap showing the variations of deuterium uptake between apo- and ligand-bound LXR $\alpha$  (a) and LXR $\beta$  (b) LBD peptides pre-incubated with the SRC1 peptide. Color scheme is identical to Figure 2. Deuterium uptake values for all peptides were corrected to back exchange using the fully deuterated controls. Missing peptides are shown in dark grey. Secondary structure is noted on top of the heatmap. HDX-MS measurements were performed in triplicates and average values are shown. The complete peptide list and numerical values of differences in deuteration between apo and ligand-bound states are shown in the Supplementary Table 4.

*Related to Figure 3*

**a**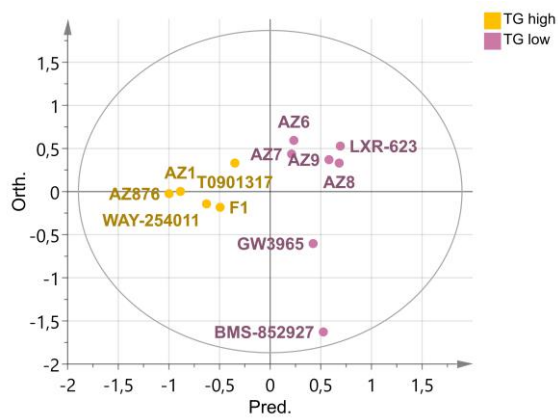**b**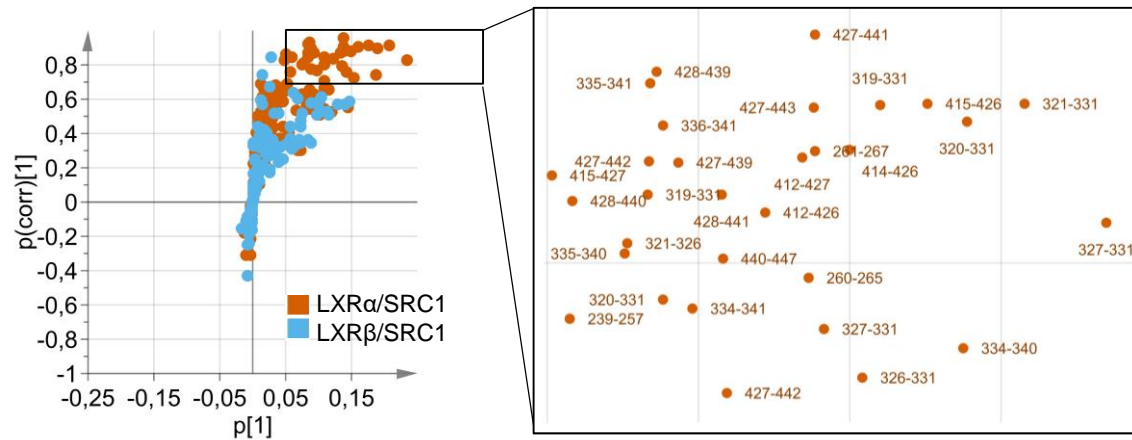**c**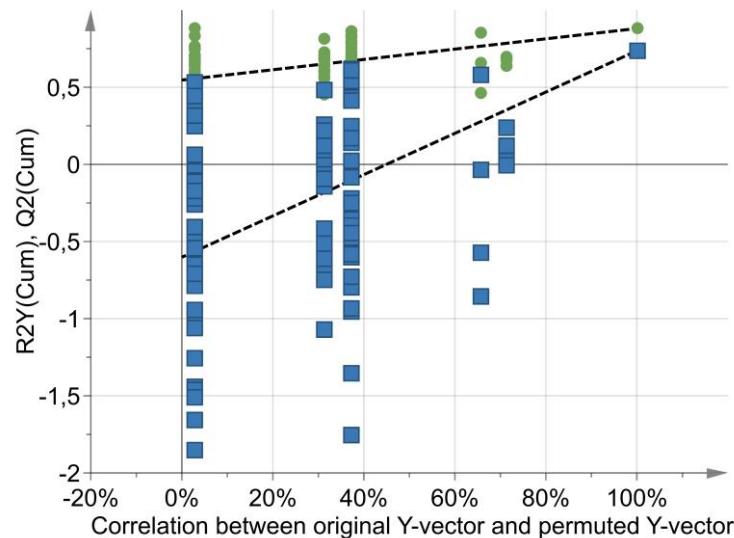

**Supplementary Figure 16.** OPLS-DA TG model obtained using the LXR $\alpha$ /SRC1 and LXR $\beta$ /SRC1 HDX-MS datasets. OPLS-DA score plot (a) showing the degree of separation of the model between lipogenic (yellow) and non-lipogenic (purple) compounds (N = 12, R2X(cum) = 63.8%, R2Y(cum) = 88.1%, Q2(cum) = 73.7%, P-value = 0,033); corresponding S-plot (b) and its zoomed-in part representing limits used for the selection of differential peptides with the highest contribution to class separation ( $|p(\text{corr})| > 0.7$ ,  $p > 0.05$ ). Orange dots: LXR $\alpha$ /SRC1 peptides, cyan dots: LXR $\beta$ /SRC1 peptides. (c) A permutation test performed with 100 random permutations in an OPLS-DA model showing R2 (green circles) and Q2 (blue boxes) values from the permuted analysis (bottom left) significantly lower than the corresponding original values (top right).

*Related to Figure 3*



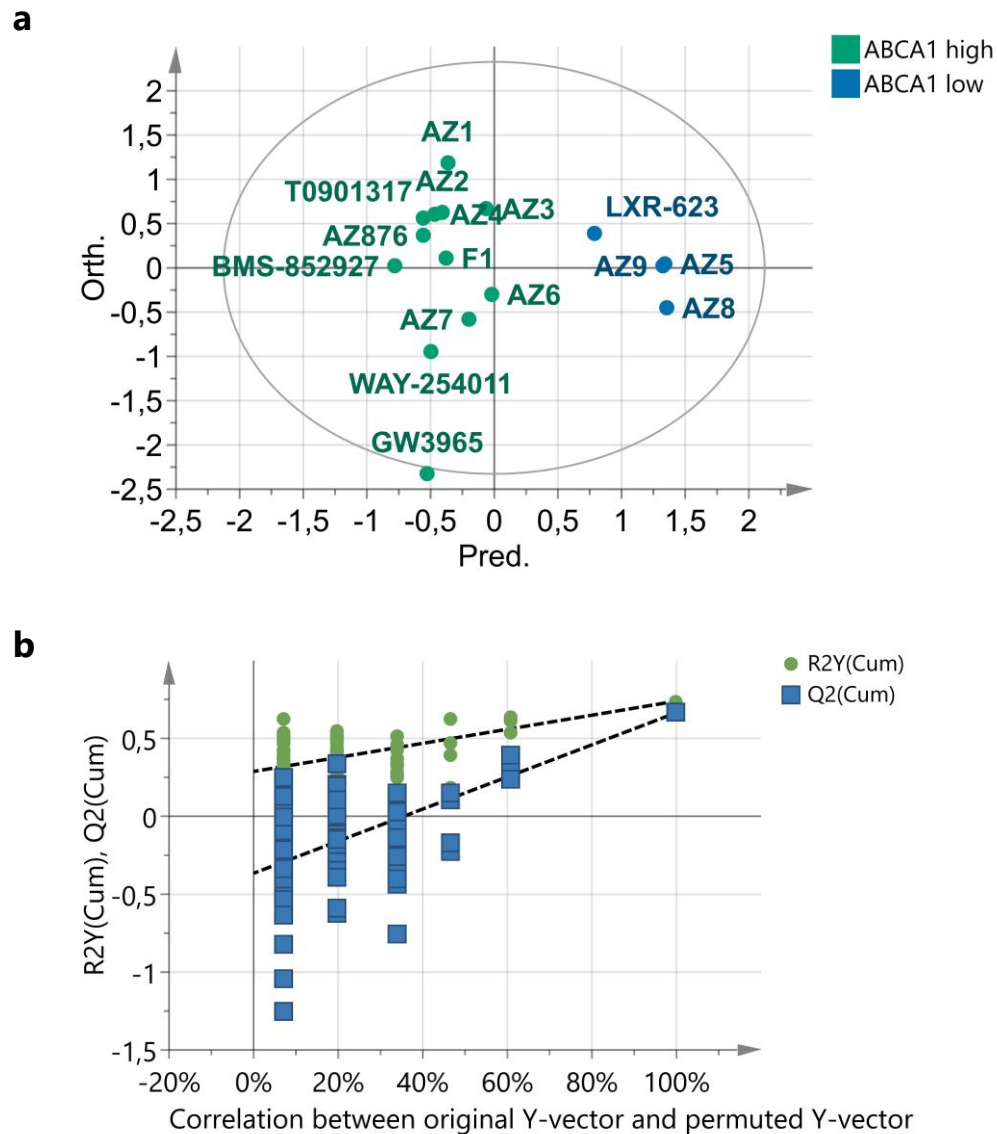

**Supplementary Figure 17.** OPLS-DA model of ABCA1 effects built using the HDX-MS dataset. OPLS-DA score plot (a) showing the degree of separation of the model between ligands inducing high (green dots) and low (blue dots) levels of intestine ABCA1 (N = 16, R2X(cum) = 49.9%, R2Y(cum) = 91.1%, Q2(cum) = 76.6%, P-value = 1,75E-03) and permutation plot of the OPLS-DA model (b). A permutation test performed with 100 random permutations in an OPLS-DA model showing R2 (green circles) and Q2 (blue boxes) values from the permuted analysis (bottom left) significantly lower than the corresponding original values (top right).

Related to Figure 4

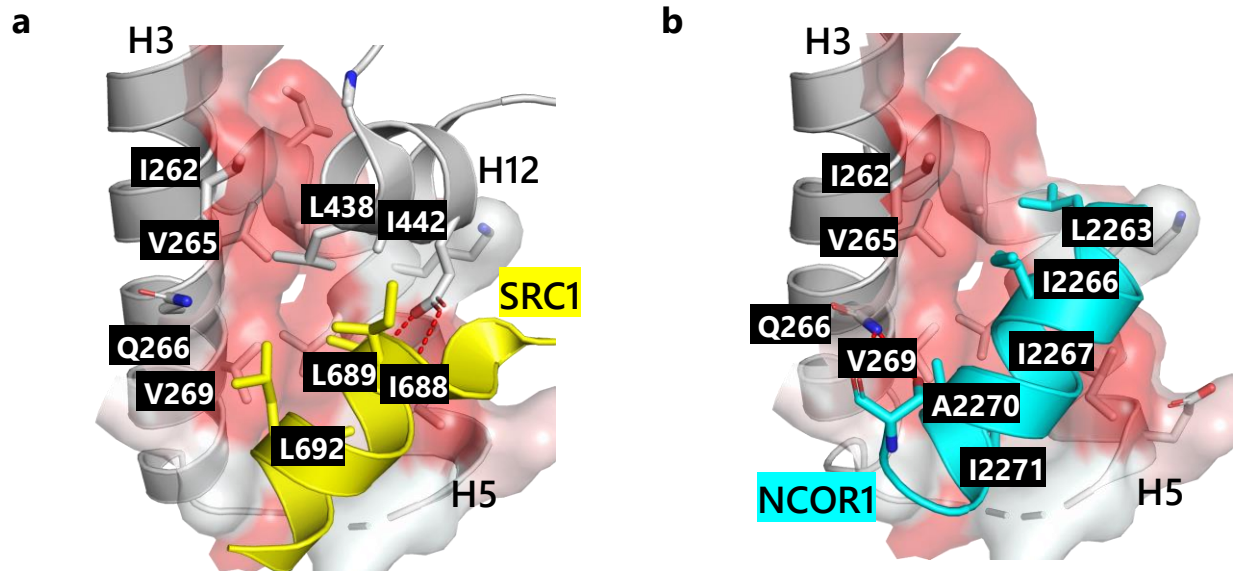

**Supplementary Figure 18.** Details of the interactions between LXR $\alpha$  and the cofactor peptides. LXR $\alpha$  interacting with the SRC1 peptide (3IPQ.pdb) (a) and the NCOR1-ID2 peptide (b). NCOR1 peptide is from the FXR-NCOR crystal structure (4WVD.pdb) superimposed with the LXR $\alpha$  (3IPQ.pdb). Surfaces created by helices H3 and H5 are colored by the amino acid hydrophobicity scale<sup>1</sup>.

1. Eisenberg D. *et al.* Amino acid scale: Normalized consensus hydrophobicity scale. *J. Mol. Biol.* 179, 125-142 (1984).

*Related to Figures 4 and 5*

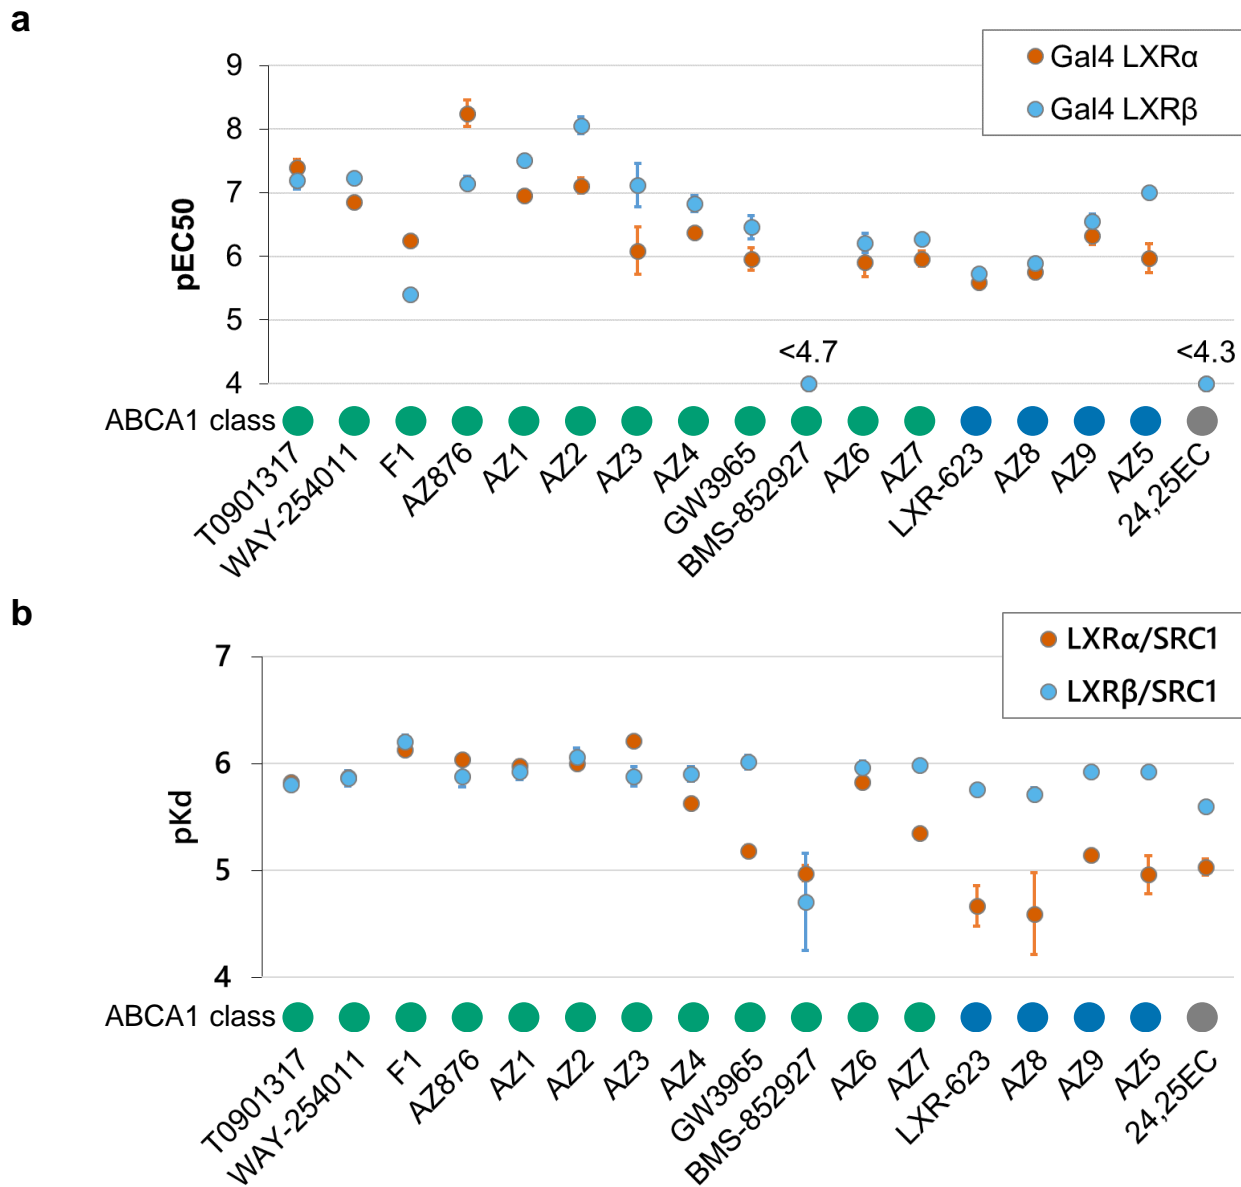

**Supplementary Figure 19.** *In vitro* reporter gene (a) and coactivator recruitment (b) assays do not predict intestinal *Abca1* induction by LXR compounds. Compound classes based on ABCA1 activity are shown under each graph for clarity: “high ABCA1” ligands in green, “low ABCA1” in blue, compounds with no assigned ABCA1 class in grey. Reporter gene assay: data  $\pm$  standard deviation (for n values, see Table 1), SRC1 coactivator recruitment assay: data  $\pm$  standard error.

Related to Figures 4 and 5

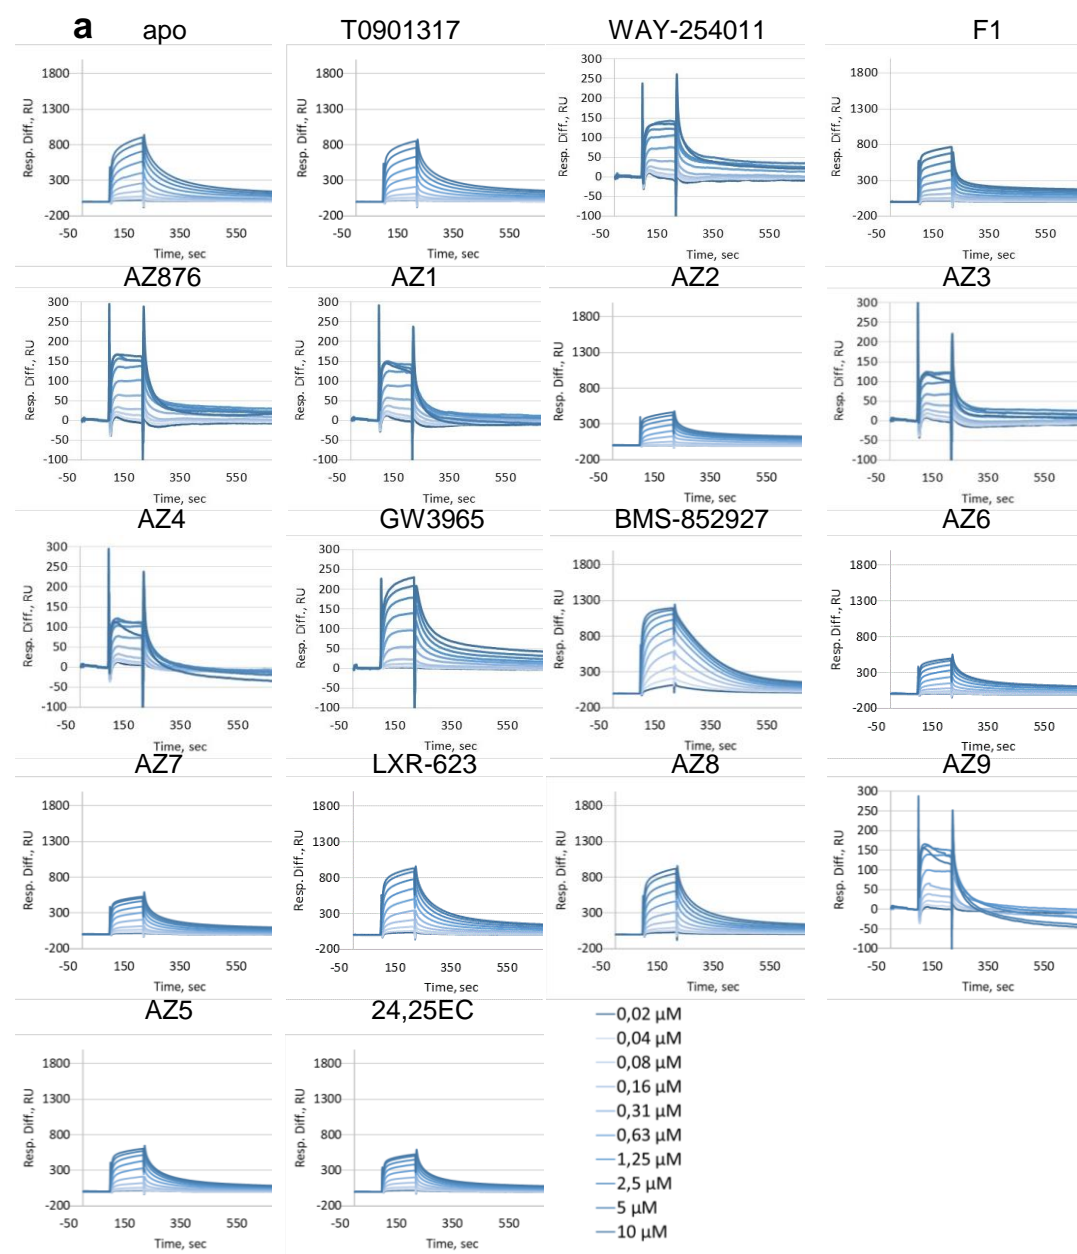

**Supplementary Figure 20.** SPR analysis of ligand-modulated LXR $\alpha$ /NCOR1 interactions. Obtained response curves (a) are shown in the 0.02 – 10  $\mu\text{M}$  concentration range of LXR $\alpha$ . (b) Equilibrium binding affinity parameters derived from fitting the steady-state region of the sensorgram data to nonlinear regression.

Related to Figure 5

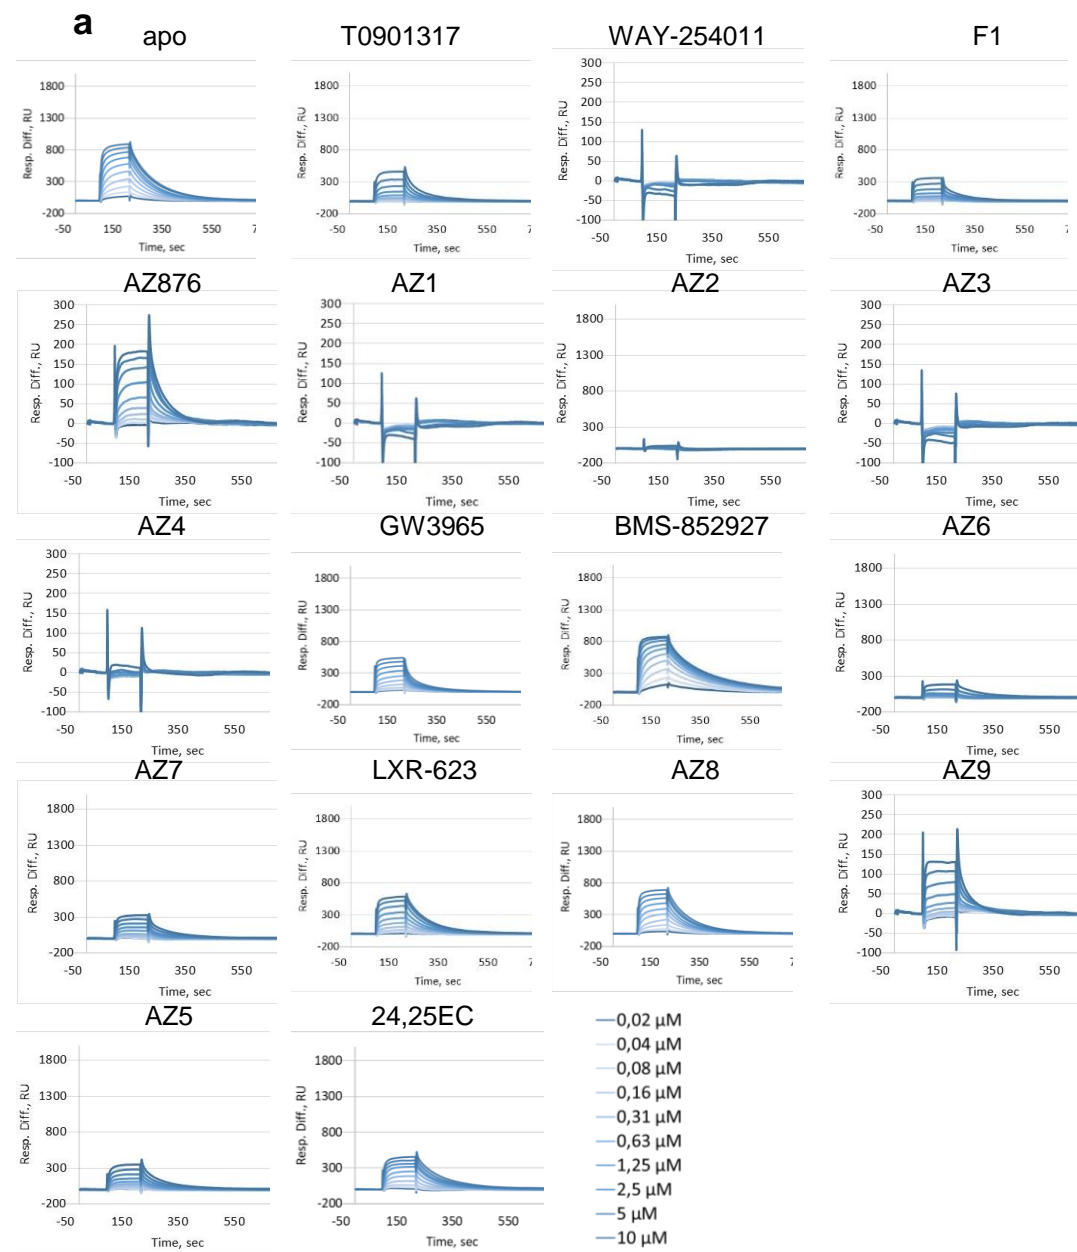

**b**

| LXR $\alpha$ /NCOR1 | pKd   | SE pKd | Kd, $\mu\text{M}$ |
|---------------------|-------|--------|-------------------|
| apo                 | 6,324 | 0,166  | 0,47              |
| T0901317            | 5,040 | 0,095  | 9,12              |
| WAY-254011          | -     | -      | -                 |
| F1                  | 5,122 | 0,032  | 7,55              |
| AZ876               | 5,961 | 0,036  | 1,09              |
| AZ1                 | -     | -      | -                 |
| AZ2                 | -     | -      | -                 |
| AZ3                 | -     | -      | -                 |
| AZ4                 | -     | -      | -                 |
| GW3965              | 5,977 | 0,029  | 1,05              |
| BMS-852927          | 6,828 | 0,103  | 0,15              |
| AZ6                 | 4,623 | 0,163  | 23,82             |
| AZ7                 | 5,640 | 0,055  | 2,29              |
| LXR-623             | 5,903 | 0,032  | 1,25              |
| AZ8                 | 6,261 | 0,049  | 0,55              |
| AZ9                 | 5,645 | 0,085  | 2,26              |
| AZ5                 | 5,296 | 0,107  | 5,06              |
| 24,25EC             | 6,251 | 0,049  | 0,56              |

**Supplementary Figure 21.** SPR analysis of ligand-modulated LXR $\beta$ /NCOR1 interactions. Obtained response curves (a) are shown in the 0.02 – 10  $\mu\text{M}$  concentration range of LXR $\beta$ . (b) Equilibrium binding affinity parameters derived from fitting the steady-state region of the sensorgram data to nonlinear regression.

Related to Figure 5





# **Supplementary Note 1 Synthetic procedures**

## **Content:**

- **Synthesis Schemes**
- **General Information**
- **Synthesis Procedures for Compounds AZ1-AZ9**
- **References to previously published compounds**



## Synthesis Schemes

### Scheme S1. Synthesis of final compound AZ1

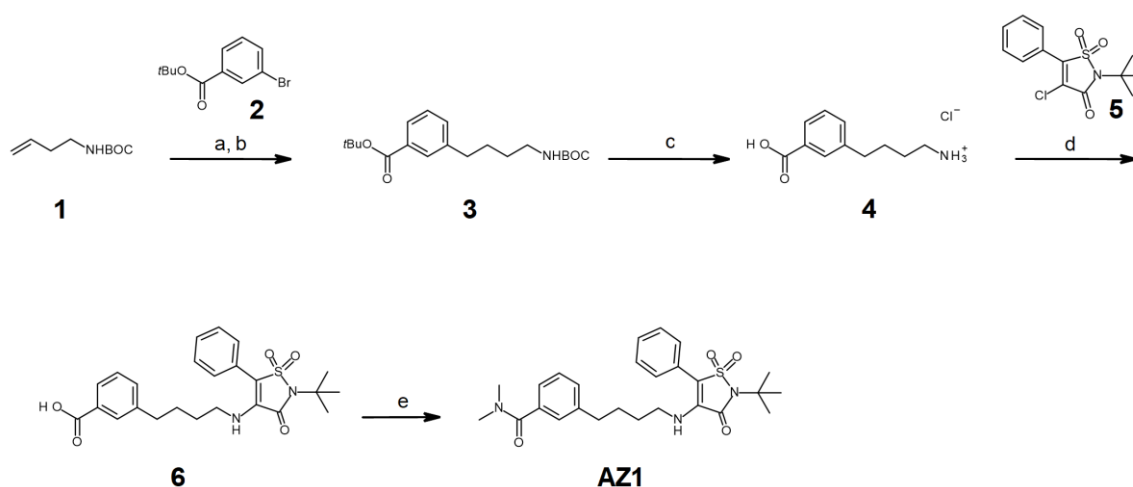

Reagents and conditions: (a) 0.4 M 9-BBN, dry THF, 0 °C–rt, 16 h; (b) 3 M K<sub>3</sub>PO<sub>4</sub>, 1,1'-bis (diphenylphosphino)ferrocene palladium (II) chloride, DMF, rt, 48 h; (c) 4 M HCl in dioxane, EtOAc, 24 h; (d) K<sub>2</sub>CO<sub>3</sub>, DMSO, 100 °C, 1 h, microwave heating; (e) TBTU, DIPEA, (CH<sub>3</sub>)<sub>2</sub>NH x HCl, DMF, 1 h, rt.

### Scheme S2. Synthesis of final compounds AZ2 and AZ3

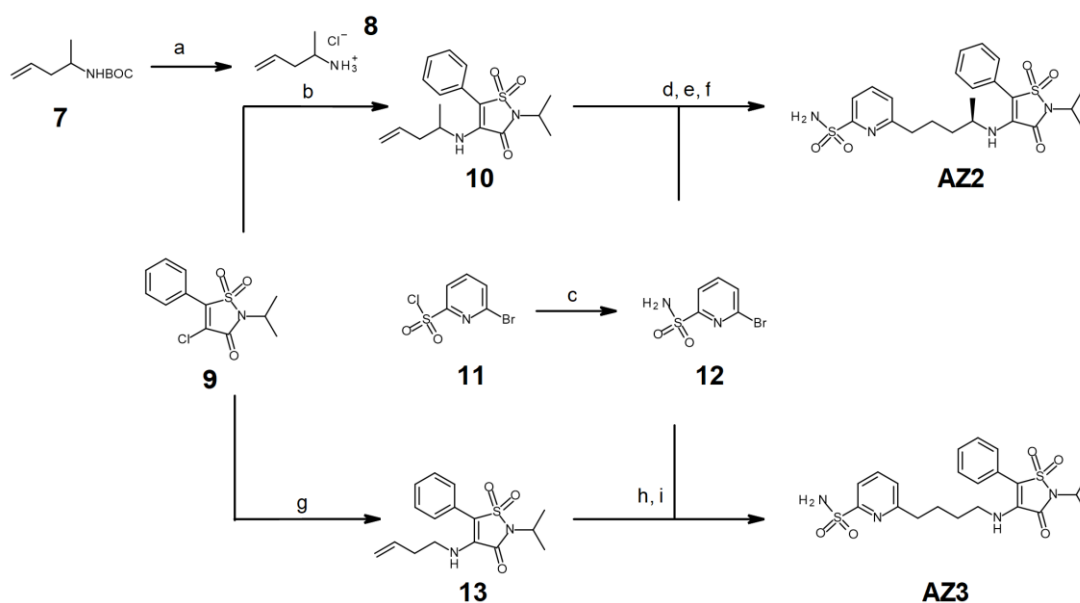

Reagents and conditions: (a) HCl in EtOAc (sat), rt, 6 h; (b) Et<sub>3</sub>N, CH<sub>3</sub>CN, 130 °C microwave heating, 40 min; (c) 2 M NH<sub>3</sub> in MeOH, THF, rt; (d) 0.5 M 9-BBN, dry THF, 0 °C–rt, 1 h; (e) 3 M K<sub>3</sub>PO<sub>4</sub>, 1,1'-bis (diphenylphosphino)ferrocene palladium (II) chloride, dry DMF, 110 °C microwave heating; 20 min; (f) chiral chromatography; (g) 3-buten-1-amine, Et<sub>3</sub>N, CH<sub>3</sub>CN, rt, 1.5 h; (h) 0.5 M 9-BBN, dry THF, 0 °C–rt, 2 h; (i) 3 M K<sub>3</sub>PO<sub>4</sub>, 1,1'-bis (diphenylphosphino)ferrocene palladium (II) chloride, THF, 90 °C microwave heating; 10 min.

**Scheme S3.** Synthesis of key intermediate for final compounds **AZ4**, **AZ6** and **AZ7**

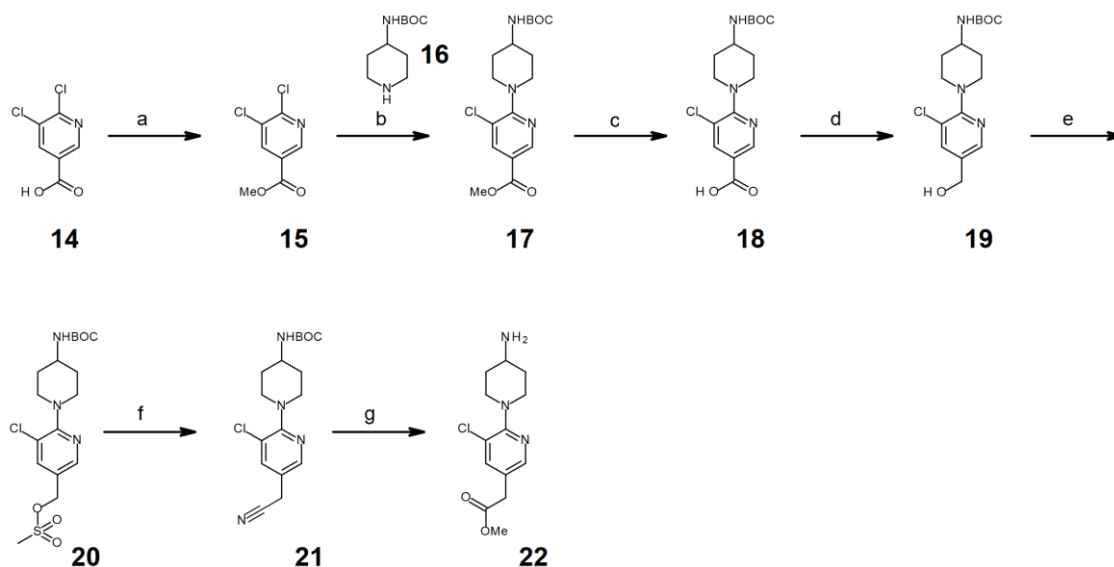

Reagents and conditions: (a)  $\text{H}_2\text{SO}_4$ , MeOH, reflux, 2.5 h; (b) DIPEA, DMSO, 150 °C microwave heating, 1 h; (c) LiOH, THF/water (1:1), rt, 3 h; (d) 1 M  $\text{BH}_3$ -THF complex, THF, -78 °C–rt, 4 h; (e) MsCl,  $\text{Et}_3\text{N}$ , DCM, rt, 4 h; (f) tetrabutylammonium cyanide;  $\text{CH}_3\text{CN}$ , rt, 2 h; (g) conc HCl, MeOH, reflux, 2 h.

**Scheme S4.** Synthesis of final compounds **AZ4**, **AZ6** and **AZ7**

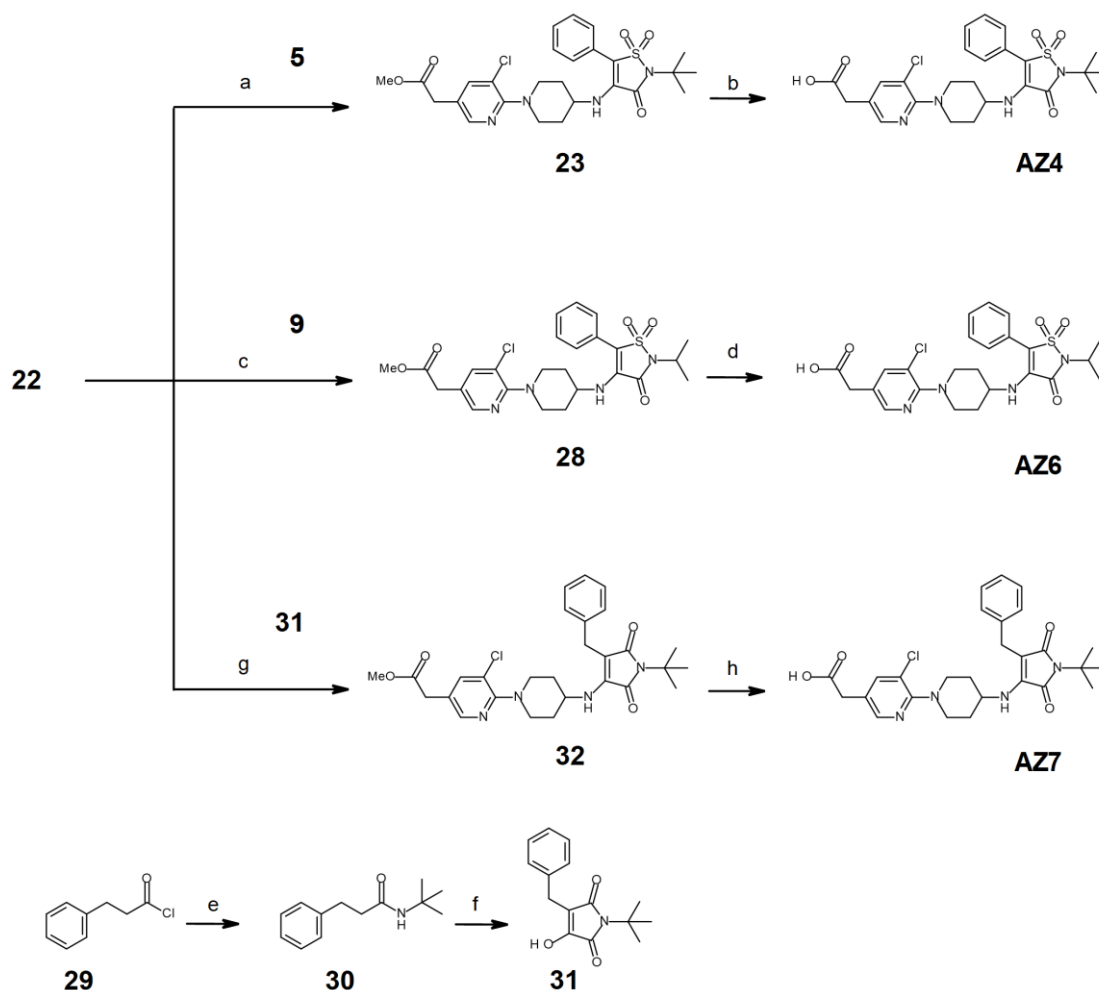

Reagents and conditions: (a) Et<sub>3</sub>N, dry DMF, 120 °C microwave heating, 15 min; (b) LiI, pyridine, 130 °C microwave heating, 3 h; (c) Et<sub>3</sub>N, dry DMF, 120 °C microwave heating, 20 min; (d) LiI, pyridine, 150 °C microwave heating, 1.5 h; (e) *tert*-butylamine, Et<sub>3</sub>N, THF, 0 °C, 15 min; (f) diethyl oxalate, KOtBu, THF, 0–65 °C, 50 min; (g) 4-toluenesulfonic acid monohydrate, toluene/DMF, 120 °C, 50 min; (h) LiOH, THF/water, rt, 2 h.

### Scheme S5. Synthesis of final compound **AZ5**

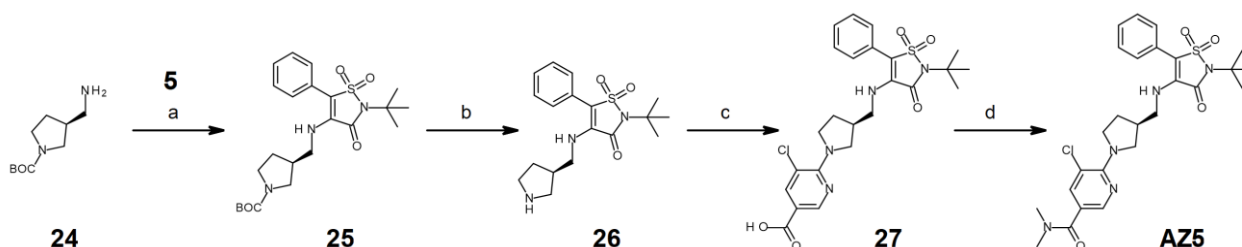

Reagents and conditions: (a) Et<sub>3</sub>N, DMF, 130 °C microwave heating, 40 min; (b) TFA, DCM, rt, 1.5 h; (c) DIPEA, 5,6-dichloronicotinic acid, dry DMSO, 150 °C microwave heating, 1 h; (d) DIPEA, TBTU, dimethylamine hydrochloride, dry DMF, rt, 2 h.

### Scheme S6. Synthesis of final compound **AZ8**

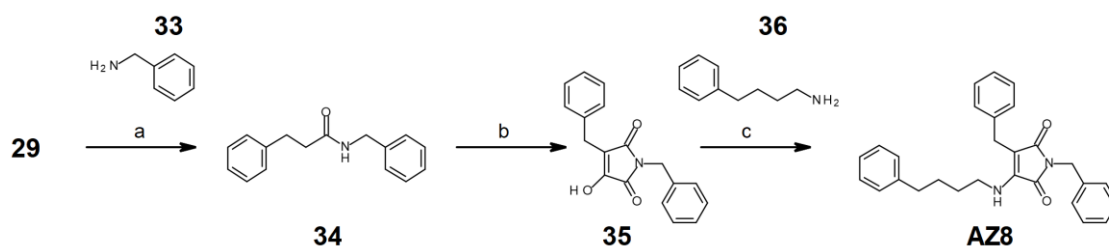

Reagents and conditions: (a) benzylamine, dry DCM, 0 °C, 2 h; (b) diethyl oxalate, KOtBu, dry THF, rt, 30 min; (c) 4-phenylbutylamine, 4-toluenesulfonic acid monohydrate, toluene/DMF, 120–130 °C microwave heating, 30–50 min.

### Scheme S7. Synthesis of final compound AZ9

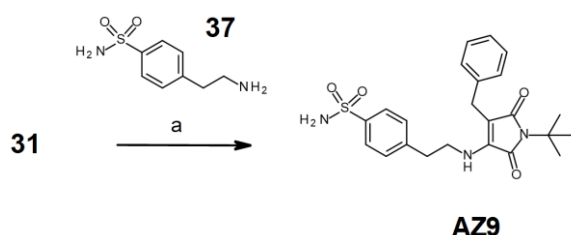

Reagents and conditions: (a) 4-toluenesulfonic acid monohydrate, dry toluene/DMF, 130 °C microwave heating, 40 min.

### General Information

All reagents and solvents were obtained from commercially available suppliers and used without purification. Microwave heating was achieved in a Biotage initiator synthesizer. Flash chromatography was performed on Biotage automated flash systems with UV detection using preppacked silica gel columns (SNAP Cartridge KP-Sil, 50  $\mu\text{m}$  silica particles with a surface area of 500  $\text{m}^2/\text{g}$ . Sizes from 10 g to 100 g silica was used) supplied by Biotage. The used phase separators was supplied from IST. Preparative HPLC was conducted on a Kromasil C18 column (10  $\mu\text{m}$  250 x 50 ID mm) using a variable gradient of acetonitrile in  $\text{H}_2\text{O}/\text{CH}_3\text{CN}/\text{formic acid}$  95/5/0.2 buffer over 20–30 minutes with a flow of 100 mL/min. The instrument was combined with an UV/VIS detector 155 from Gilson. Analytical UHPLC/MS was obtained on a Waters Aquity system with a Waters SQD mass spectrometer. The UHPLC was equipped with a BEH C18 column (1.7  $\mu\text{m}$  2.1 x 50 mm) using a 46 mM ammonium carbonate/ $\text{NH}_3$  buffer at pH 10

and a HSS C18 column (1.8  $\mu\text{m}$  2.1  $\times$  50 mm) using a 11 mM ammonium formate buffer at pH 3 with a flow rate of 1 mL/min. The mass spectrometer used electrospray ionization (ESI) in both positive and negative mode.  $^1\text{H}$  NMR and  $^{13}\text{C}$  NMR spectra were generated on 300, 400 or 500 MHz Bruker Avance spectrometers. Chemical shifts ( $\delta$ ) are given in parts per million (ppm), with the residual solvent signal used as reference. Coupling constants ( $J$ ) are reported as Hz. NMR abbreviations are used as follows: br = broad, s = singlet, d = doublet, t = triplet, q = quartet, dd = double doublet, m = multiplet.

All final compounds **AZ1–AZ9** have a purity (UV) of >94 %.

### Synthesis of final compound **AZ1** (Scheme S1)

**4-(3-Carboxyphenyl)butylammonium hydrochloride (4)**. 9-BBN (0.4 M in hexane, 8.75 mL, 3.50 mmol) was added to a solution of *tert*-butyl *N*-but-3-enylcarbamate (0.5 g, 2.92 mmol) in 10 mL dry THF whilst cooled in an ice bath. The reaction was allowed to warm to rt and left to stir overnight (16 h). 3 M  $\text{K}_3\text{PO}_4$  (aq. 1.24 g, 5.84 mmol), *tert*-butyl 3-bromobenzoate (0.75 g, 2.92 mmol), 1,1'-bis (diphenylphosphino)ferrocene palladium (II) chloride (0.12 g, 0.15 mmol) and 2 mL DMF were added. The mixture was stirred at rt, under  $\text{N}_2$  over the weekend. The reaction was concentrated under reduced pressure, EtOAc and brine was added. The organic phase was washed four times with brine, evaporated and then further purified by flash chromatography (Biotage HPFC, Si-column) using a gradient of 0–10 % MTBE in toluene. Gave 0.97 g of *tert*-butyl 3-[4-(*tert*-butoxycarbonylamino)butyl]benzoate (**3**). To **3** (0.90 g, 2.59 mmol) in 8 mL EtOAc was added 8 mL of 4 M HCl in dioxane. The mixture was stirred at rt over night. The solid was filtered off, washed with EtOAc and dried under reduced pressure. Gave 0.46 g (99 %) of the title compound.  $^1\text{H}$  NMR (500 MHz,  $(\text{CD}_3)_2\text{SO}$ )  $\delta$  12.90 (s, 1H), 7.93 (s, 3H), 7.73 – 7.83 (m, 2H), 7.45 – 7.52 (m, 1H), 7.36 – 7.45 (m, 1H), 2.79 (t,  $J = 7.4$  Hz, 2H), 2.67 (t,  $J = 7.5$  Hz, 2H), 1.48 – 1.75 (m, 4H).

**2-tert-Butyl-4-chloro-1,1-dioxo-5-phenyl-isothiazol-3-one (5).** Synthesis described in Li, L. et al. Derivatives of Isothiazole-3(2H)-one 1,1-dioxides as Liver X Receptor Modulators. PCT Int. Appl. WO 2006/73363, July 13th, 2006.

**3-[4-[(2-tert-Butyl-1,1,3-trioxo-5-phenyl-isothiazol-4-yl)amino]butyl]benzoic acid (6).** A mixture of **5** (0.3 g, 1.00 mmol), **4** (0.23 g, 1.00 mmol) and K<sub>2</sub>CO<sub>3</sub> (0.42 g, 3.00 mmol) in 6 mL DMSO was heated at 100 °C for 1 h. More **5** (30 mg, 0.10 mmol) was added and the heating was continued at 100 °C for 15 min. The solvent was evaporated and EtOAc (5 mL), 1 N HCl (4 mL) and brine (2 mL) was added. The phases were separated and the organic phase was washed again with a mixture of brine (2 mL) and 1 N HCl (1 mL). The organic phase was evaporated to dryness and the residue was purified by flash chromatography (Biotage HPFC, Si-column) using a gradient of 12–100 % EtOAc (containing 1 % AcOH) in toluene. Gave 0.17 g (37 %) of the title compound. <sup>1</sup>H NMR (500 MHz, CDCl<sub>3</sub>) δ 7.92 – 7.99 (m, 1H), 7.8 – 7.87 (m, 1H), 7.47 – 7.53 (m, 2H), 7.37 – 7.47 (m, 4H), 7.31 – 7.36 (m, 1H), 5.25 (t, *J* = 6.0 Hz, 1H), 2.87 (q, *J* = 6.4 Hz, 2H), 2.53 (t, *J* = 7.0 Hz, 2H), 1.74 (s, 9H), 1.39 – 1.46 (m, 4H), OH peak overlaps with water peak.

**3-[4-[(2-tert-Butyl-1,1,3-trioxo-5-phenyl-isothiazol-4-yl)amino]butyl]-N,N-dimethylbenzamide (AZ1).** TBTU (48 mg, 0.15 mmol) was added to a mixture of **6** (57 mg, 0.12 mmol) and DIPEA (65 μL, 0.37 mmol) in DMF. After preactivation over 15 min dimethylamine hydrochloride (15 mg, 0.19 mmol) was added and the reaction was stirred for 1 h. EtOAc was added and the organic phase was washed twice with brine, once with sat. NaHCO<sub>3</sub> and K<sub>2</sub>CO<sub>3</sub> then again with brine. The organic layer was evaporated to dryness and the remaining crude was purified by flash chromatography (Biotage HPFC, Si-column) using an isocratic system of toluene/EtOAc, 1:2, to give 48 mg (79 %) of the title compound. <sup>1</sup>H NMR (500 MHz, CDCl<sub>3</sub>) δ 7.46 – 7.52 (m, 2H), 7.4 – 7.46 (m, 3H), 7.26 – 7.32 (m, 1H), 7.19 – 7.24 (m, 1H), 7.08 – 7.17 (m, 2H), 5.25 (t, *J* = 6.0 Hz, 1H), 3.04 (d, *J* = 73.2 Hz, 6H), 2.77 – 2.91 (m, 2H), 2.41 – 2.56

(m, 2H), 1.73 (s, 9H), 1.34 – 1.47 (m, 4H). <sup>13</sup>C NMR (126 MHz, CDCl<sub>3</sub>) δ 171.9, 159.9, 142.2, 136.7, 135.2, 131.8, 129.8, 129.7, 128.8, 128.5, 127.2, 125.3, 124.8, 107.1, 61.7, 44.1, 39.8, 35.6, 35.3, 29.2, 28.2, 27.8.

### Synthesis of final compound AZ2 (Scheme S2)

*tert-Butyl N-(1-methylbut-3-enyl)carbamate (7)*. Synthesis described in Veenstra S. J., Schmid P. One-pot Synthesis of Protected Homoallyl Amines. *Tetrahedron Letters*. **1997**, 38, 997.

*Pent-4-en-2-amine hydrochloride (8)*. Compound **7** (5.96 g, 32.17 mmol) was dissolved in 5 mL EtOAc and cooled on ice. 55 mL of HCl in EtOAc (sat.) was added. The reaction solution was stirred at rt for 6 h. The reaction was followed by TLC using EtOAc/heptane (40:60) as mobile phase (R<sub>f</sub>: 0.7). The solvent was evaporated under reduced pressure to give 5.6 g (99 %) of the title compound as a light brown oil. <sup>1</sup>H NMR (500 MHz, CDCl<sub>3</sub>) δ 8.26 (s, 2H), 5.62–5.78 (m, 1H), 5.09–5.23 (m, 2H), 3.22–3.36 (m, 1H), 2.41–2.54 (m, 1H), 2.26–2.38 (m, 1H), 1.33 (d, *J* = 6.6 Hz, 3H).

*4-Chloro-2-isopropyl-1,1-dioxo-5-phenyl-isothiazol-3-one (9)*. Prepared as described in Li, L. et al. Derivatives of Isothiazole-3(2*H*)-one 1,1-dioxides as Liver X Receptor Modulators. PCT Int. Appl. WO 2006/73363, July 13th, 2006.

*2-Isopropyl-4-(1-methylbut-3-enylamino)-1,1-dioxo-5-phenyl-isothiazol-3-one (10)*. A mixture of **8** (2 g, 12.65 mmol), **9** (3.62 g, 12.65 mmol) and Et<sub>3</sub>N (7.02 mL, 50.61 mmol) in CH<sub>3</sub>CN (40 mL) was heated in the microwave at 130 °C for 40 min. The black crude solution was evaporated. EtOAc was added. The organic phase was washed once with 1 M NaHCO<sub>3</sub>, twice with water and once with brine, dried using a phase separator and evaporated. The crude was further purified by HPFC (Si-column) using a gradient of EtOAc/heptane, 0–20 % EtOAc, detection at 300 nm, to give 1.84 g (43 %, 5.50 mmol) of the title compound as an orange solid after evaporation of solvent. <sup>1</sup>H NMR (500 MHz, CDCl<sub>3</sub>) δ 7.48–7.57 (m, 2H), 7.41–7.48 (m, 3H), 5.35–5.48 (m, 1H), 5.16 (d, *J* = 8.8 Hz, 1H), 4.97–5.06 (m, 1H), 4.85–4.97 (m, 1H), 4.33–

4.47 (m, 1H), 3.20–3.32 (m, 1H), 1.92–2.12 (m, 2H), 1.58 (d,  $J = 6.9$  Hz, 6H), 0.97 (d,  $J = 6.5$  Hz, 3H).

**6-Bromopyridine-2-sulfonamide (12).** 6-Bromopyridine-2-sulfonyl chloride (0.91 g, 3.02 mmol) was dissolved in THF (12 mL). 2 M NH<sub>3</sub> in MeOH (15 mL) was added. Gave a cloudy reaction that was stirred at rt for 2.5 h. More 2 M NH<sub>3</sub> in MeOH (6 mL) was added and the reaction mixture was stirred over night. The solvent was evaporated to give a white solid. EtOAc was added, the organic phase was washed with 1 M HCl and water, dried using a phase separator and evaporated. The compound was dissolved in DMSO and purified by preparative HPLC on a Kromasil C8 column (10  $\mu$ m 250 x 50 ID mm) using a gradient of 10–60 % CH<sub>3</sub>CN in H<sub>2</sub>O/CH<sub>3</sub>CN/formic acid 95:5:0.2 buffer over 25 min with a flow of 100 mL/min. The compounds were detected by UV at 230 nm. The CH<sub>3</sub>CN was evaporated and the water phase was extracted twice with EtOAc, dried using a phase separator and evaporated to give 0.52 g (73 %, 2.20 mmol) the title compound as a white solid. <sup>1</sup>H NMR (500 MHz, CD<sub>3</sub>OD  $\delta$  7.94–8.00 (m, 1H), 7.86–7.94 (m, 1H), 7.76–7.82 (m, 1H).

**6-[Rel-(4R)-4-[(2-isopropyl-1,1,3-trioxo-5-phenyl-isothiazol-4-yl)amino]pentyl]pyridine-2-sulfonamide (AZ2).** Compound **10** (1 g, 2.99 mmol) was dissolved in dry THF (21 mL) in a microwave vial and cooled in an ice-bath. (1s,5s)-9-Borabicyclo[3.3.1]nonane (0.5 M, 11.96 mL, 5.98 mmol) was added and the yellow reaction solution was stirred at rt for 1h. A solution of 3 M K<sub>3</sub>PO<sub>4</sub> (1.90 g, 8.97 mmol, aq), **12** (0.71 g, 2.99 mmol) dissolved in dry DMF (3 mL) and 1,1'-bis (diphenylphosphino)ferrocene palladium (II) chloride (0.36 g, 0.45 mmol) were quickly added to the yellow reaction solution. The solution was evacuated and filled with nitrogen. The mixture was heated in the microwave for 20 min at 110 °C. The solvent was evaporated and DCM was added. The organic phase was washed with water, the organic phase was separated using a phase separator and evaporated. The crude was purified by HPFC (Biotage system, Si-column) using a gradient of 30–80 % EtOAc (containing 4 % 2 M NH<sub>3</sub> in



MeOH) in heptane. The compounds were detected at 310 nm. Gave 0.60 g (40 %, 1.22 mmol,) of the title compound, a white solid, as a racemic mixture after evaporation of solvents. The enantiomers were separated by chiral chromatography on a Chiralpak IA 250 mm x 20 mm, 5  $\mu$ m HPLC column. 12 mg (10 mg/mL in DCM ) was injected and eluted with heptane/EtOAc at a flow rate of 18 mL/min and detected at 300 nm. The second eluted compound was collected and evaporated to yield the title compound (269 mg, 99.7 % ee )  $[\alpha]_D^{20} +88.4$  (c 1.0, CH<sub>3</sub>CN). <sup>1</sup>H NMR (500 MHz, CDCl<sub>3</sub>)  $\delta$  7.71–7.82 (m, 2H), 7.39–7.47 (m, 2H), 7.32–7.39 (m, 3H), 7.17–7.19 (m, 1H), 5.31 (d,  $J = 9.3$  Hz, 1H), 5.18 (s, 2H), 4.26–4.40 (m, 1H), 3.09–3.24 (m, 1H), 2.54–2.76 (m, 2H), 1.45–1.56 (m, 8H), 1.16–1.39 (m, 2H), 0.89 (d,  $J = 6.4$  Hz, 3H). <sup>13</sup>C NMR (126 MHz, CDCl<sub>3</sub>)  $\delta$  161.4, 157.8, 157.1, 137.3, 133.7, 130.6, 128.8, 127.8, 125.2, 124.1, 117.2, 104.8, 48.0, 46.6, 35.7, 34.5, 24.4, 19.9, 19.2, 19.1. HRMS (ESI)  $m/z$ : 493.1567 (calcd for C<sub>22</sub>H<sub>29</sub>N<sub>4</sub>O<sub>5</sub>S<sub>2</sub> [M+H]<sup>+</sup>, 493.1574).

#### **Synthesis of final compound AZ3 (Scheme S2)**

**4-(But-3-enylamino)-2-isopropyl-1,1-dioxo-5-phenyl-isothiazol-3-one (13).** Et<sub>3</sub>N (5 mL, 36.07 mmol) was added to a solution of **9** (10 g, 35.00 mmol) and but-3-en-1-amine (2.74 g, 38.50 mmol) in CH<sub>3</sub>CN (120 mL) at room temperature. The reaction was stirred at that temperature for 1.5 h. The reaction was concentrated, dissolved in DCM and washed with 1 M NaHCO<sub>3</sub>, 1 M HCl and water. The organic phase was filtered through a phase separator and concentrated. The brown crude was further purified by flash chromatography using a Biotage HPFC system (Si-column). Isocratic run with 15 % EtOAc (containing 4 % of 2 M NH<sub>3</sub> in MeOH) in heptane. Gave the title compound (5.96 g, 53 %, 18.60 mmol) as a light yellow solid after evaporation of solvent. <sup>1</sup>H NMR (500 MHz, CDCl<sub>3</sub>)  $\delta$  7.50–7.61 (m, 2H), 7.43–7.50 (m, 3H), 5.48–5.66 (m, 1H), 5.24–5.40 (m, 1H), 5.06–5.12 (m, 1H), 4.99–5.06 (m, 1H), 4.32–4.51 (m, 1H), 2.87–2.97 (m, 2H), 2.10–2.21 (m, 2H), 1.60 (d,  $J = 6.9$  Hz, 6H).

**6-[4-[(2-Isopropyl-1,1,3-trioxo-5-phenyl-isothiazol-4-yl)amino]butyl]pyridine-2-**

**sulfonamide (AZ3).** Compound **13** (0.6 g, 1.87 mmol) was dissolved in dry THF (4 mL) and cooled on an icebath. 0.5 M (1*s*,5*s*)-9-borabicyclo[3.3.1]nonane (9.36 mL, 4.68 mmol) was added and the reaction stirred for 2 h warming to room temperature. To this, whilst bubbling N<sub>2</sub>, was added sequentially, and quickly, a 3 M solution (aq) of K<sub>3</sub>PO<sub>4</sub> (3.12 mL, 9.36 mmol), **12** (0.444 g, 1.87 mmol) as a solution in THF (3 mL) and finally 1,1'-bis (diphenylphosphino)ferrocene palladium (II) chloride (0.151 g, 0.19 mmol). The reaction solution was sealed in a microwave vial, evacuated and flushed with N<sub>2</sub> three times and then heated in the microwave at 90 °C for 10 minutes. To the reaction mixture was added DCM (60 mL) and water (30 mL), the organic phase was separated and the aqueous layer extracted again with DCM (30 mL). The organics were pooled, passed over a phase separator and reduced in vacuo. The resulting oil was taken up in DMSO (4 mL) and purified by preparative HPLC (Kromasil C8 column, 10 μm 250 x 50 ID mm) using a gradient of 20–60 % CH<sub>3</sub>CN in H<sub>2</sub>O/CH<sub>3</sub>CN/acetic acid 95/5/0.2 buffer over 30 minutes with a flow of 100 mL/min. The compounds were detected by UV at 230 nm. The solvents were evaporated and the residue dissolved in DCM and purified on a 50 g Biotage SNAP flash silica column. The compound was eluted with a gradient of 0–100 % EtOAc in heptane over 20 CV. Gave the title compound (0.586 g, 65.4 %) as a white solid. <sup>1</sup>H NMR (500 MHz, CDCl<sub>3</sub>) δ 7.77–7.89 (m, 2H), 7.45–7.53 (m, 2H), 7.38–7.45 (m, 3H), 7.27–7.29 (m, 1H), 5.65–5.74 (m, 1H), 5.31 (s, 2H), 4.34–4.47 (m, 1H), 2.89 (q, *J* = 6.4 Hz, 2H), 2.78 (t, *J* = 7.3 Hz, 2H), 1.60–1.67 (m, 3H), 1.57 (d, *J* = 6.9 Hz, 6H), 1.37–1.48 (m, 2H). The multiplett at 1.60–1.67 overlaps with the water peak. <sup>13</sup>C NMR (126 MHz, CDCl<sub>3</sub>) δ 162.4, 158.8, 158.1, 138.4, 135.5, 131.6, 129.6, 128.6, 126.3, 125.1, 106.6, 47.6, 44.3, 36.5, 27.7, 26.2, 20.2. HRMS (ESI) *m/z*: 479.1425 (calcd for C<sub>21</sub>H<sub>27</sub>N<sub>4</sub>O<sub>5</sub>S<sub>2</sub> [M+H]<sup>+</sup>, 479.1418).

**Synthesis of final compound AZ4 (Scheme S3 and S4)**

***Methyl 6-[4-(tert-butoxycarbonylamino)-1-piperidyl]-5-chloro-pyridine-3-carboxylate (17).***

5,6-Dichloronicotinic acid (3 g, 15.63 mmol) was suspended in MeOH (100 mL). Sulfuric acid (5 mL) was added and the mixture was heated to reflux for 2.5 h. The reaction mixture was cooled to rt and concentrated. DCM (100 mL) and 1 M NaOH (40 mL) was added. The phases were separated and the organic phase was washed with 1 M NaOH (40 mL), dried (MgSO<sub>4</sub>) and concentrated to give 2.89 g (89 %, 14.03 mmol) of methyl 5,6-dichloropyridine-3-carboxylate (**15**) as a white solid. Compound **15** (1.39 g, 6.74 mmol) and boc-4-aminopiperidine (1.48 g, 7.42 mmol) was added to two microwave vials and dissolved in dry DMSO (13 mL). DIPEA (2.35 mL, 13.49 mmol) was added to each vial. The reaction mixtures were heated in the microwave for 1 h at 150 °C. The reaction mixtures were combined, diluted with DCM and washed with water using a phase separator. The solvent was evaporated and the crude was further purified by a Biotage SP1™ HPFC system (Si-column) using isocratic conditions for 3 CV with 7 % EtOAc/triethylamine (99.5:0.5) in heptane/EtOAc/ Et<sub>3</sub>N (90:9.5:0.5) followed by a gradient of 7–60 % EtOAc/ Et<sub>3</sub>N (99.5:0.5) for 10 CV. Finally the title compound was eluted using isocratic conditions for 2 CV with 60 % EtOAc/ Et<sub>3</sub>N (99.5:0.5). Gave 3.03 g (60 %, 8.19 mmol) of the title compound as a white solid. <sup>1</sup>H NMR (500 MHz, CDCl<sub>3</sub>) δ 8.73 (d, *J* = 2.0 Hz, 1H), 8.12 (d, *J* = 2.0 Hz, 1H), 4.52 (bs, 1H), 4–4.13 (m, 2H), 3.91 (s, 3H), 3.74 (bs, 1H), 3–3.12 (m, 2H), 2.01–2.14 (m, 2H), 1.52–1.60 (m, 2H), 1.47 (s, 9H).

***6-[4-(tert-Butoxycarbonylamino)-1-piperidyl]-5-chloro-pyridine-3-carboxylic acid (18).***

Compound **17** (3.02 g, 8.17 mmol) was dissolved in THF (22 mL) and water (22 mL). LiOH (0.25 g, 10.62 mmol) was added and the reaction was stirred for 3 h. The reaction solution was diluted with diethyl ether and neutralized with acetic acid (1 mL). The organic layer was separated, dried (Na<sub>2</sub>SO<sub>4</sub>), filtered and evaporated to give 3.09 g (99 %, 8.69 mmol) of the title compound as a white solid. LC–MS (ESI) *m/z*: 356 (calcd for C<sub>16</sub>H<sub>23</sub>ClN<sub>3</sub>O<sub>4</sub> [M+H]<sup>+</sup>, 356). <sup>1</sup>H NMR (500 MHz, CD<sub>3</sub>OD) δ 8.68 (d, *J* = 1.9 Hz, 1H), 8.12 (d, *J* = 1.9 Hz, 1H), 3.99–4.12 (m,

2H), 3.53–3.66 (m, 1H), 2.97–3.14 (m, 2H), 1.91–2.05 (m, 2H), 1.53–1.69 (m, 2H), 1.45 (s, 9H).

***tert-Butyl N-[1-[3-chloro-5-(hydroxymethyl)-2-pyridyl]-4-piperidyl]carbamate (19).***

Compound **18** (4.01 g, 11.27 mmol) was dissolved in dry THF (60 mL) and cooled in an isopropanol/CO<sub>2</sub> bath. 1 M borane THF-complex (45 mL, 45.08 mmol) was added slowly and dropwise. The reaction was allowed to slowly reach rt. After 4 h the reaction was quenched with MeOH (2 mL). The reaction was concentrated, diluted with DCM and washed with water using a phase separator. The organic phase was evaporated to give 3.78 g (98 %, 11.06 mmol) of the title compound as a white solid. LC-MS (ESI) *m/z*: 342 (calcd for C<sub>16</sub>H<sub>25</sub>ClN<sub>3</sub>O<sub>3</sub> [M+H]<sup>+</sup>, 342). <sup>1</sup>H NMR (500 MHz, CD<sub>3</sub>OD) δ 8.12 (d, *J* = 1.6 Hz, 1H), 7.72 (d, *J* = 1.7 Hz, 1H), 4.55 (s, 2H), 3.66–3.79 (m, 2H), 3.47–3.61 (m, 1H), 2.82–2.97 (m, 2H), 1.90–2.03 (m, 2H), 1.57–1.72 (m, 2H), 1.47 (s, 9H).

***[6-[4-(tert-Butoxycarbonylamino)-1-piperidyl]-5-chloro-3-pyridyl]methyl methanesulfonate (20).*** Compound **19** (3.78 g, 11.06 mmol) was dissolved in dry DCM (60 mL) and cooled in an ice-bath. Methanesulfonyl chloride (0.51 mL, 6.63 mmol) was added during stirring, followed by dropwise addition of Et<sub>3</sub>N (1.15 mL, 8.29 mmol). The reaction was stirred at rt for 3 h. Additional methanesulfonyl chloride (0.51 mL, 6.63 mmol) and Et<sub>3</sub>N (1.15 mL, 8.29 mmol) was added and the mixture was stirred at rt for 1 h. The reaction mixture was diluted with DCM, washed with sat. NaHCO<sub>3</sub> solution and water, using a phase separator, and evaporated. The crude was purified by flash chromatography using Biotage SP4 TM HPFC system (Si-column). The title compound was eluted using isocratic conditions with 5 % of EtOAc/Et<sub>3</sub>N (99.5:0.5) in heptane/EtOAc/Et<sub>3</sub>N (90:9.5:0.5) for 3 CV followed by a gradient for 10 CV with 5–80 % of EtOAc/Et<sub>3</sub>N (99.5:0.5) and finally isocratic conditions for 2 CV with 80 % EtOAc/Et<sub>3</sub>N (99.5:0.5). Gave 1.69 g (36 %, 4.04 mmol) of the title compound. <sup>1</sup>H NMR (500 MHz, CDCl<sub>3</sub>)

$\delta$  8.15 (d,  $J = 2.0$  Hz, 1H), 7.65 (d,  $J = 2.1$  Hz, 1H), 4.52 (s, 3H), 3.76–3.91 (m, 2H), 3.69 (s, 1H), 2.89–3.05 (m, 2H), 2.01–2.14 (m, 2H), 1.54–1.63 (m, 6H), 1.48 (s, 9H).

***tert-Butyl N-[1-[3-chloro-5-(cyanomethyl)-2-pyridyl]-4-piperidyl]carbamate (21)***. Compound **20** (1.70 g, 4.04 mmol) was dissolved in dry CH<sub>3</sub>CN (50 mL) and tetrabutylammonium cyanide (2.17 g, 8.08 mmol) was added. The mixture was stirred at rt for 2 h. The reaction mixture was evaporated, diluted with EtOAc and washed with water, dried (MgSO<sub>4</sub>), filtered and evaporated to give 1.41 g (99 %, 4.03 mmol) of the title compound. <sup>1</sup>H NMR (400 MHz, CDCl<sub>3</sub>)  $\delta$  8.06 (d,  $J = 2.2$  Hz, 1H), 7.56 (d,  $J = 2.2$  Hz, 1H), 4.47 (s, 1H), 3.72–3.82 (m, 2H), 3.63 (s, 3H), 2.86–2.98 (m, 2H), 1.98–2.10 (m, 2H), 1.48–1.61 (m, 3H), 1.43 (s, 9H).

***Methyl 2-[6-[4-[(2-tert-butyl-1,1,3-trioxo-5-phenyl-isothiazol-4-yl)amino]-1-piperidyl]-5-chloro-3-pyridyl]acetate (23)***. Compound **21** (1.88 g, 5.36 mmol) was refluxed in MeOH (100 mL) and conc. HCl (100 mL) for 2 h. The MeOH was evaporated. The reaction mixture was neutralized to pH ~7 with 2 M Na<sub>2</sub>CO<sub>3</sub> solution and solid K<sub>2</sub>CO<sub>3</sub> then extracted with EtOAc, dried (Na<sub>2</sub>SO<sub>4</sub>), filtered and evaporated to give 1.07 g (70 %, 3.77 mmol) of methyl 2-[6-(4-amino-1-piperidyl)-5-chloro-3-pyridyl]acetate (**22**) as yellow oil. LC–MS (ESI)  $m/z$ : 284 (calcd for C<sub>13</sub>H<sub>19</sub>ClN<sub>3</sub>O<sub>2</sub> [M+H]<sup>+</sup>, 284). Compound **5** (1.43 g, 4.77 mmol) was dissolved in dry DMF (6 mL) in a microwave vial and cooled in an ice-bath. Compound **22** (1.49 g, 5.25 mmol) dissolved in dry DMF (9 mL) was added followed by Et<sub>3</sub>N (0.80 mL, 5.72 mmol). The reaction mixture was heated in the microwave at 120 °C for 15 min. The mixture was diluted with DCM, washed with water, separated using a phase separator and evaporated. The crude product was purified with a SP4 TM HPFC system (Si-column (CV=120 mL), A = heptane/EtOAc/Et<sub>3</sub>N (95:4.5:0.5), B = EtOAc/Et<sub>3</sub>N (99.5:0.5), isocratic conditions with 6 % B for 2 CV followed by a gradient with 6–55 % B for 10 CV, finally isocratic conditions with 55 % B for 2 CV. Gave 2.19 g (83 %, 4.00 mmol) of the title compound as a light yellow solid after evaporation of solvents. LC–MS (ESI)  $m/z$ : 547 (calcd for C<sub>26</sub>H<sub>32</sub>ClN<sub>4</sub>O<sub>5</sub>S [M+H]<sup>+</sup>, 547). <sup>1</sup>H NMR (500 MHz,

CDCl<sub>3</sub>) δ 7.98 (d, *J* = 2.1 Hz, 1H), 7.47–7.56 (m, 3H), 7.39–7.47 (m, 3H), 5.24 (d, *J* = 8.9 Hz, 1H), 3.69 (s, 3H), 3.52–3.61 (m, 2H), 3.50 (s, 2H), 2.96–3.17 (m, 1H), 2.31–2.47 (m, 2H), 1.69–1.80 (m, 11H), 1.45–1.55 (m, 2H).

**2-[6-[4-[(2-*tert*-Butyl-1,1,3-trioxo-5-phenyl-isothiazol-4-yl)amino]-1-piperidyl]-5-chloro-3-pyridyl]acetic acid (AZ4).** Three microwave vials were charged with **23** (0.69 g, 1.26 mmol) and anhydrous LiI (1.35 g, 10.9 mmol). Pyridine (11 mL) was added to each vial. The reactions were heated in the microwave at 130 °C for 1 h. Additional LiI (1.01 g, 7.57 mmol) was added to each vial and the reactions were heated in the microwave for 2 h at 130 °C. The reaction mixtures were combined, diluted with EtOAc, washed with 1 M HCl (aq) and dried (MgSO<sub>4</sub>). The crude was purified by anion exchange chromatography (ISOLUTE NH<sub>2</sub>, 10 g column). The column was rinsed with CH<sub>3</sub>CN and MeOH, the product eluted with MeOH/AcOH (98:2) to give 0.93 g (46 %, 1.74 mmol) of the title compound. <sup>1</sup>H NMR (500 MHz, CD<sub>3</sub>OD) δ 8.00 (d, *J* = 2.0 Hz, 1H), 7.65 (d, *J* = 2.0 Hz, 1H), 7.48–7.59 (m, 5H), 3.50–3.64 (m, 4H), 3.03–3.16 (m, 1H), 2.24–2.34 (m, 2H), 1.68–1.82 (m, 12H), 1.55–1.68 (m, 2H). <sup>13</sup>C NMR (126 MHz, CD<sub>3</sub>OD) δ 159.5, 157.2, 145.8, 139.8, 134.7, 131.9, 129.5, 128.3, 125.7, 122.5, 105.7, 60.8, 50.3, 31.5, 26.4. HRMS (ESI) *m/z*: 533.1601 (calcd for C<sub>25</sub>H<sub>30</sub>ClN<sub>4</sub>O<sub>5</sub>S [M+H]<sup>+</sup>, 533.162).

#### Synthesis of final compound AZ5 (Scheme S5)

***tert*-Butyl (3*S*)-3-[[2-*tert*-butyl-1,1,3-trioxo-5-phenyl-isothiazol-4-yl)amino]methyl]pyrrolidine-1-carboxylate (25).** Compound **5** (2 g, 6.67 mmol) was dissolved in dry DMF (15 mL). (S)-3-(Aminomethyl)-1-*N*-*boc*-pyrrolidine (1.60 g, 8.01 mmol) was added followed by Et<sub>3</sub>N (1.09 mL, 8.01 mmol). The reaction mixture was heated in the microwave for 40 min at 130 °C. The mixture was diluted with DCM, washed with 1 M NaHCO<sub>3</sub> solution, 1 M HCl and water. The phases were separated using a phase separator. The crude product was purified with a Biotage HPFC system using isocratic conditions with EtOAc (containing a small amount of NH<sub>3</sub>) in heptane (30:70). Gave the 2.31 g (74 %, 4.98 mmol) of the title compound as a white

solid. <sup>1</sup>H NMR (400 MHz, CDCl<sub>3</sub>) δ 7.39–7.52 (m, 5H), 5.28 (s, 1H), 3.10–3.38 (m, 3H), 2.67–2.98 (m, 3H), 2.02–2.23 (m, 1H), 1.63–1.86 (m, 10H), 1.43 (s, 9H), 1.27–1.38 (m, 1H).

***2-tert-Butyl-1,1-dioxo-5-phenyl-4-[(3R)-pyrrolidin-3-yl]methylaminoisothiazol-3-one (26).***

Compound **25** (2.31 g, 4.98 mmol) was stirred in TFA (20 mL) and DCM (40 mL) at rt. After 1.5 h the solvent was evaporated and the crude was coevaporated with toluene twice. The residue was dissolved in DCM and washed with water, dried using a phase separator and evaporated to give a transparent oil. DCM was added which made the desired product precipitated as a white solid that was filtered off and dried. Gave 1.4 g (77 %, 3.85 mmol) of the title compound. <sup>1</sup>H NMR (400 MHz, CD<sub>3</sub>OD) δ 7.42–7.59 (m, 5H), 3.04–3.23 (m, 4H), 2.89–3.03 (m, 2H), 2.60–2.69 (m, 1H), 2.18–2.29 (m, 1H), 1.71–1.82 (m, 1H), 1.68 (s, 9H), 1.32–1.48 (m, 2H).

***6-[(3S)-3-[(2-tert-Butyl-1,1,3-trioxo-5-phenyl-isothiazol-4-yl)amino]methyl]pyrrolidin-1-yl]-5-chloro-N,N-dimethyl-pyridine-3-carboxamide (AZ5).*** DIPEA (1.99 mL, 11.54 mmol) was added to a solution of **26** (1.4 g, 3.85 mmol) and 5,6-dichloronicotinic acid (0.81 g, 4.24 mmol) in dry DMSO (10 mL). The reaction mixture was heated in the microwave for 1 h at 150 °C. The reaction mixture was diluted with EtOAc and washed with 1 M HCl solution and water, dried using a phase separator and evaporated. Gave 1.68 g (58 %, 2.27 mmol, 70 % pure) of crude 6-[(3S)-3-[(2-tert-butyl-1,1,3-trioxo-5-phenyl-isothiazol-4-yl)amino]methyl]pyrrolidin-1-yl]-5-chloro-pyridine-3-carboxylic acid (**27**) that was used directly. Compound **27** (1.68 g, 2.27 mmol), DIPEA (1.46 mL, 9.06 mmol) and TBTU (1.09 g, 3.40 mmol) were dissolved in dry DCM (35 mL). Dimethylamine hydrochloride (0.28 g, 3.40 mmol) was added. The mixture was stirred at rt for 2 h. The mixture was diluted with DCM and washed with 1 M HCl (aq), 1 M NaHCO<sub>3</sub> (aq) and water, dried using a phase separator and evaporated. The crude product was purified by flash chromatography (Biotage HPFC system) using an isocratic system of heptane/EtOAc containing 4 % NH<sub>3</sub> in EtOH, 40:60, followed by a second run using EtOAc

(with 4 % NH<sub>3</sub> in EtOH) /heptane (50:50). Gave 0.73 g of the title compound (59 %, 1.34 mmol) as a white solid after evaporation of solvents. <sup>1</sup>H NMR (500 MHz, CDCl<sub>3</sub>) δ 8.16 (d, *J* = 2.0 Hz, 1H), 7.66 (d, *J* = 2.0 Hz, 1H), 7.49 – 7.53 (m, 2H), 7.42 – 7.47 (m, 3H), 5.33 – 5.49 (m, 1H), 3.66 – 3.77 (m, 2H), 3.63 (dd, *J* = 11.0, 7.0 Hz, 1H), 3.31 (dd, *J* = 11.0, 7.2 Hz, 1H), 3.10 (s, 6H), 2.90 – 3.04 (m, 2H), 2.18 – 2.30 (m, 1H), 1.86 – 1.96 (m, 1H), 1.75 (s, 9H), 1.40 – 1.52 (m, 1H). <sup>13</sup>C NMR (126 MHz, CDCl<sub>3</sub>) δ 168.4, 159.5, 134.8, 131.6, 129.8, 128.7, 124.7, 121.8, 115.4, 61.6, 52.9, 49.1, 46.3, 38.3, 29.2, 27.6. HRMS (ESI) *m/z*: 546.1951 (calcd for C<sub>26</sub>H<sub>33</sub>ClN<sub>5</sub>O<sub>4</sub>S [M+H]<sup>+</sup>, 546.1937).

### Synthesis of final compound AZ6 (Scheme S3 and S4)

***Methyl 2-[5-chloro-6-[4-[(2-isopropyl-1,1,3-trioxo-5-phenyl-isothiazol-4-yl)amino]-1-piperidyl]-3-pyridyl]acetate (28)***. Compound **22** (0.66 g, 2.32 mmol), **9** (0.65 g, 2.27 mmol) and Et<sub>3</sub>N (0.38 mL, 2.73 mmol) were dissolved in dry DMF (7 mL) and divided between two microwave vials. The reaction mixtures were heated in the microwave for 20 min at 120 °C. The mixtures were diluted with DCM and washed with water. The organic phase was separated using a phase separator, and evaporated. The crude product was further purified by a Biotage SP4 TM HPFC system. The title compound was eluted using isocratic conditions with heptane/EtOAc/Et<sub>3</sub>N (90:9.5:0.5), for 3 CV followed by a gradient with 0–70 % EtOAc/Et<sub>3</sub>N (99.5:0.5) in heptane/EtOAc/Et<sub>3</sub>N (90:9.5:0.5). Gave 0.68 g (55 %, 1.27 mmol) of the title compound. <sup>1</sup>H NMR (500 MHz, CDCl<sub>3</sub>) δ 7.99 (d, *J* = 2.0 Hz, 1H), 7.50–7.59 (m, 3H), 7.42–7.49 (m, 3H), 5.26 (d, *J* = 8.9 Hz, 1H), 4.35–4.49 (m, 1H), 3.70 (s, 3H), 3.54–3.65 (m, 2H), 3.51 (s, 2H), 3.06–3.21 (m, 1H), 2.36–2.52 (m, 2H), 1.73–1.82 (m, 2H), 1.59 (d, *J* = 6.9 Hz, 6H), 1.48–1.55 (m, 2H).

***2-[5-Chloro-6-[4-[(2-isopropyl-1,1,3-trioxo-5-phenyl-isothiazol-4-yl)amino]-1-piperidyl]-3-pyridyl]acetic acid (AZ6)***. Two microwave vials were charged with **28** (0.17 g, 0.32 mmol) and LiI (0.69 g, 5.16 mmol). Pyridine (3.5 mL) was added to each vial. The vials were heated in the



microwave oven for 1 h at 150 °C. Additional LiI (0.17 g, 1.29 mmol) was added to each vial as LCMS showed starting material left, and the reactions were heated in the microwave for 30 min at 150 °C. The reaction mixtures were combined, diluted with EtOAc, washed with 1 M HCl solution and dried using MgSO<sub>4</sub>. The crude was further purified by anion exchange chromatography using an Isolute PEAX column (5 g). The column was rinsed with DCM and CH<sub>3</sub>CN followed by DCM/MeOH (99:1). The product was eluted with DCM/MeOH/AcOH (92:5:2) to give 0.28 g (83 %, 0.54 mmol) of the title compound. <sup>1</sup>H NMR (500 MHz, CDCl<sub>3</sub>) δ 7.99 (s, 1H), 7.48–7.58 (m, 3H), 7.40–7.48 (m, 3H), 5.28 (d, *J* = 8.6 Hz, 1H), 4.33–4.47 (m, 1H), 3.56 (d, *J* = 12.4 Hz, 2H), 3.50 (s, 2H), 3.05–3.19 (m, 1H), 2.35–2.46 (m, 2H), 1.70–1.81 (m, 2H), 1.46–1.62 (m, 8H). <sup>13</sup>C NMR (126 MHz, CDCl<sub>3</sub>) δ 172.9, 157.6, 156.3, 144.8, 138.8, 133.3, 130.5, 127.7, 124.0, 123.2, 121.7, 105.5, 49.2, 46.6, 39.5, 35.8, 31.2, 19.1. HRMS (ESI) *m/z*: 519.146 (calcd for C<sub>24</sub>H<sub>28</sub>ClN<sub>4</sub>O<sub>5</sub>S [M+H]<sup>+</sup>, 519.1464).

#### **Synthesis of final compound AZ7 (Scheme S3 and S4)**

***N-tert-Butyl-3-phenyl-propanamide (30)***. Hydrocinnamoyl chloride (13.21 mL, 88.96 mmol) was added dropwise to a solution of *tert*-butylamine (11.22 mL, 0.11 mol) and Et<sub>3</sub>N (14.88 mL, 0.11 mol) in THF (100 mL) at 0 °C under N<sub>2</sub>. After stirring for 15 min the mixture was concentrated. The residue was dissolved in EtOAc and extracted with sat. aq. NaHCO<sub>3</sub>-solution. Evaporation of the solvent gave 16.78 g (91 %, 81.73 mmol) of the desired product as a white solid. <sup>1</sup>H NMR (500 MHz, CDCl<sub>3</sub>) δ 7.28–7.32 (m, 2H), 7.17–7.25 (m, 3H), 5.10 (bs, 1H), 2.96 (t, *J* = 7.6 Hz, 2H), 2.35–2.45 (m, 2H), 1.30 (s, 9H).

***3-Benzyl-1-tert-butyl-4-hydroxy-pyrrole-2,5-dione (31)***. Compound **30** (9.37 g, 45.64 mmol) was dissolved in 200 mL dry THF and diethyl oxalate (27.90 mL, 0.21 mol) was added. The mixture was cooled in an ice-bath. Under N<sub>2</sub> atmosphere, KOtBu (23.05 g, 0.21 mol) was added carefully. After the addition, the ice-bath was removed and the mixture was stirred for 20 min, then heated to 65 °C for 30 min. The THF was evaporated. EtOAc (150 mL) was added to the

residue. The resulting mixture was cooled in an ice bath and water (20 mL) was added, followed by 10 % HCl until pH 1. The aqueous phase was extracted three times with EtOAc (20 mL). The organic phases were combined, dried (MgSO<sub>4</sub>) and evaporated to give 17 g of crude product that was purified by column chromatography (ISOLUTE Si-column, 70 g/150 mL x 2) using a gradient of EtOAc in heptane, 5–75 % EtOAc, to give 10.6 g (99 %, 41.1 mmol) of the title compound as a solid. <sup>1</sup>H NMR (400 MHz, (CD<sub>3</sub>)<sub>2</sub>SO) δ 11.87 (s, 1H), 7.21–7.31 (m, 2H), 7.12–7.21 (m, 3H), 3.48 (s, 2H), 1.47 (s, 9H).

**Methyl 2-[6-[4-[(4-benzyl-1-tert-butyl-2,5-dioxo-pyrrol-3-yl)amino]-1-piperidyl]-5-chloro-3-pyridyl]acetate (32).** In two microwave vials were added **22** (500 mg, 1.76 mmol), **31** (450 mg, 1.76 mmol), catalytic amounts of 4-toluenesulfonic acid, monohydrate, toluene (10 mL) and DMF (1 mL). The reaction mixtures were heated at 120 °C for 50 min. The reaction mixtures were concentrated. To the residues were added EtOAc and sat. aq. NaHCO<sub>3</sub> solution, the organic phases were separated, dried and concentrated. The crude products were purified using two Si-columns with an isocratic system of heptane/EtOAc 80:20, R<sub>f</sub> = 0.1, to give totally 1.24 g (68 %, 2.36 mmol) of the desired product. <sup>1</sup>H NMR (500 MHz, CDCl<sub>3</sub>) δ 8.02 (d, *J* = 2.0 Hz, 1H), 7.54 (d, *J* = 2.0 Hz, 1H), 7.23–7.33 (m, 2H), 7.12–7.19 (m, 3H), 5.07 (d, *J* = 9.7 Hz, 1H), 3.61–3.73 (m, 7H), 3.52 (s, 2H), 3.39–3.50 (m, 1H), 2.63–2.76 (m, 2H), 1.70–1.80 (m, 2H), 1.51–1.63 (m, 11H).

**2-[6-[4-[(4-Benzyl-1-tert-butyl-2,5-dioxo-pyrrol-3-yl)amino]-1-piperidyl]-5-chloro-3-pyridyl]acetic acid (AZ7).** Compound **32** (1.25 g, 2.38 mmol) was dissolved in THF (14 mL). A solution of lithium hydroxide monohydrate (0.60 g, 14.28 mmol) in water (3.5 mL) was added during stirring. The reaction mixture was stirred at rt for 2 h. The THF was evaporated. HCl (0.1 M) was added dropwise to the residue until the precipitation stopped. The aqueous layer was extracted with EtOAc. The organic layer was dried using Na<sub>2</sub>SO<sub>4</sub>, filtered and evaporated. The crude was purified by preparative HPLC (Kromasil C8 10 μm, 250 mm x 50 mm column

with a flow of 100 mL/min) using a gradient of 40–60 % CH<sub>3</sub>CN in H<sub>2</sub>O/CH<sub>3</sub>CN/formic acid (95:5:0.2) buffer over 30 min. Gave 1.08 g (88 %, 2.11 mmol) of the title compound as yellow solid. **AZ7** (100 mg, 0.20 mmol) was dissolved in a small amount of EtOAc by heating. Heptane was added (EtOAc/heptane, 3:1). The solution was left at room temperature, in open air. Gave 75 mg (75 %, 0.15 mmol) of the title compound as a crystalline yellow solid. <sup>1</sup>H NMR (500 MHz, CDCl<sub>3</sub>) δ 8.07 (s, 1H), 7.58 (s, 1H), 7.26–7.35 (m, 3H) overlaps with solvent peak, 7.15–7.25 (m, 3H), 5.11 (d, *J* = 9.5 Hz, 1H), 3.63–3.78 (m, 4H), 3.59 (s, 2H), 3.41–3.54 (m, 1H), 2.73 (t, *J* = 12.0 Hz, 2H), 1.70–1.85 (m, 2H), 1.52–1.67 (m, 11H). <sup>13</sup>C NMR (126 MHz, CDCl<sub>3</sub>) δ 175.4, 175.2, 169.2, 157.5, 141.0, 140.3, 139.9, 128.7, 127.9, 126.3, 123.5, 122.7, 95.9, 57.0, 47.9, 36.6, 33.4, 29.2, 27.6. HRMS (ESI) *m/z*: 511.2099 (calcd for C<sub>27</sub>H<sub>32</sub>ClN<sub>4</sub>O<sub>4</sub> [M+H]<sup>+</sup>, 511.2107).

#### Synthesis of final compound **AZ8** (Scheme S6)

***N*-Benzyl-3-phenylpropanamide (34)**. Hydrocinnamoyl chloride (8.81 mL, 59.30 mmol) was dissolved in dry DCM (100 mL) and cooled to 0 °C with an icebath. Benzylamine (12.94 mL, 0.12 mol) was added and the reaction was stirred at 0 °C for 2 h. The solvent was evaporated and the crude product was dissolved in EtOAc and washed with water (300 mL) and 1 % HCl (300 mL, aq.). The organic phase was dried (Na<sub>2</sub>SO<sub>4</sub>), filtered and concentrated. The crude product was purified with column chromatography on silica gel using heptane/EtOAc (80:20) as eluent. Gave 8.0 g (56 %, 33.43 mmol) of the title compound. <sup>1</sup>H NMR (500 MHz, CDCl<sub>3</sub>) δ 7.14–7.35 (m, 10H), 5.66 (s, 1H), 4.42 (d, *J* = 5.6 Hz, 2H), 3.02 (t, *J* = 7.6 Hz, 2H), 2.54 (t, *J* = 7.6 Hz, 2H).

***1,3*-Dibenzyl-4-hydroxy-1*H*-pyrrole-2,5-dione (35)**. Compound **34** (3.72 g, 15.54 mmol) was dissolved in dry THF (50 mL). Diethyl oxalate (9.5 mL, 69.95 mmol) and KOtBu (7.85 g, 69.95 mmol) was added and the reaction was stirred at rt for 30 min. The reaction mixture was acidified with 2 M HCl to pH 3 and diluted with water. The water phase was extracted with

EtOAc (2 x 200 mL), the combined organic phases was dried (Na<sub>2</sub>SO<sub>4</sub>), filtered and evaporated. The crude product was purified with column chromatography on silica gel using heptane/EtOAc (90:10) as eluent. Gave 1.63 g (35 %, 5.56 mmol) of the title compound. <sup>1</sup>H NMR (400 MHz, (CD<sub>3</sub>)<sub>2</sub>SO) δ 12.38 (bs, 1H), 7.10–7.38 (m, 10H), 4.54 (s, 2H), 3.57 (s, 2H).

***1,3-Dibenzyl-4-(4-phenylbutylamino)pyrrole-2,5-dione (AZ8)***. Compound **35** (0.5 g, 1.70 mmol), 4-phenylbutylamine (351 μl, 2.22 mmol) and 4-toluenesulfonic acid, monohydrate (32 mg, 0.17 mmol) was dissolved in toluene/DMF (4:1) and the reaction was run in the microwave oven at 120 °C for 20 min and then at 130 °C for 50 min. The solvents were evaporated and the crude was dissolved in EtOAc (200 mL). The organic phase was washed with 1 % HCl (aq) solution, dried (Na<sub>2</sub>SO<sub>4</sub>), filtered and evaporated. The crude was further purified by flash chromatography using a Biotage SP1 system. The compound was eluted with heptane/EtOAc (90:10). Gave 0.5 g (69 %, 1.18 mmol) of the title compound. <sup>1</sup>H NMR (500 MHz, CDCl<sub>3</sub>) δ 7.24–7.37 (m, 9H), 7.13–7.22 (m, 4H), 7.08–7.13 (m, 2H), 5.02–5.13 (m, 1H), 4.65 (s, 2H), 3.72 (s, 2H), 3.19–3.31 (m, 2H), 2.52 (t, *J* = 7.4 Hz, 2H), 1.50–1.57 (m, 2H), 1.42–1.50 (m, 2H). The multiplett at 1.42–1.50 overlaps with the water peak. <sup>13</sup>C NMR (126 MHz, CDCl<sub>3</sub>) δ 168.0, 143.0, 141.6, 140.5, 136.9, 128.7, 128.6, 128.4, 128.3, 127.9, 127.6, 126.3, 126.0, 43.7, 41.6, 35.3, 29.9, 28.2, 27.5. HRMS (ESI) *m/z*: 425.2229 (calcd for C<sub>28</sub>H<sub>29</sub>N<sub>2</sub>O<sub>2</sub> [M+H]<sup>+</sup>, 425.2224).

### **Synthesis of final compound AZ9 (Scheme S7)**

***4-[2-[(4-Benzyl-1-tert-butyl-2,5-dioxo-pyrrol-3-yl)amino]ethyl]benzenesulfonamide (AZ9)***.

Compound **31** (0.66 g, 2.53 mmol), 4-(2-aminoethyl)benzenesulfonamide (0.66 g, 3.29 mmol) and 4-toluenesulfonic acid monohydrate (48 mg, 0.25 mmol) was dissolved in a mixture of dry toluene/DMF (3:1, 15 mL). The reaction was run in the microwave oven at 130 °C for 40 min. Toluene was evaporated and the crude was dissolved in water (200 mL). The pH of the water phase was set to 2 using 1 % HCl (aq). The water phase was extracted with EtOAc (200 mL),

the organic phase was dried using Na<sub>2</sub>SO<sub>4</sub>, filtered and evaporated. The crude was further purified by flash chromatography on a Biotage system (Biotage SP4) using heptane/EtOAc 65:35 as eluent to give 0.69 g (61 %, 1.56 mmol) of the title compound as a crystalline solid. Mp: 142 °C. <sup>1</sup>H NMR (500 MHz, CDCl<sub>3</sub>) δ 7.83 (d, *J* = 8.3 Hz, 2H), 7.28–7.34 (m, 2H), 7.18–7.25 (m, 1H), 7.11–7.18 (m, 4H), 5.01–5.11 (m, 1H), 4.89 (s, 2H), 3.71 (s, 2H), 3.50 (q, *J* = 6.9 Hz, 2H), 2.79 (t, *J* = 7.0 Hz, 2H), 1.58 (s, 9H). <sup>13</sup>C NMR (126 MHz, CDCl<sub>3</sub>) δ 175.1, 169.0, 143.1, 141.8, 140.5, 140.3, 129.4, 128.8, 127.8, 126.9, 126.3, 96.9, 57.1, 44.2, 36.5, 29.1, 27.3. HRMS (ESI) *m/z*: 442.1806 (calcd for C<sub>23</sub>H<sub>28</sub>N<sub>3</sub>O<sub>4</sub>S [M+H]<sup>+</sup>, 442.1795).

## References to synthesis of previously published compounds

Synthesis for previously published compounds are described in the following references.

### **BMS-852927**

Kick, E. K. *et al.* Discovery of Highly Potent Liver X Receptor beta Agonists. *ACS Med Chem Lett* **7**, 1207-1212, doi:10.1021/acsmchemlett.6b00234 (2016).

### **WAY-252623**

Wrobel, J. *et al.* Indazole-based liver X receptor (LXR) modulators with maintained atherosclerotic lesion reduction activity but diminished stimulation of hepatic triglyceride synthesis. *J Med Chem* **51**, 7161-7168, doi:10.1021/jm800799q (2008).

### **WAY-254011**

Hu, B. *et al.* Discovery of phenyl acetic acid substituted quinolines as novel liver X receptor agonists for the treatment of atherosclerosis. *J Med Chem* **49**, 6151-6154, doi:10.1021/jm0609566 (2006).

### **GW-3965**

Collins, J. L. *et al.* Identification of a nonsteroidal liver X receptor agonist through parallel array synthesis of tertiary amines. *J Med Chem* **45**, 1963-1966 (2002).

### **T 0901317**

Li, L. *et al.* Preparation of bis(trifluoromethyl)hydroxymethylbenzenesulfonamides, -ureas, and -carbamates as liver X receptor modulators. WO2000054759A2 (2000).

**F1**

Lebreton, L., Dumas, C., Massardier, C. & Bondoux, M. New sulfonylindoline derivative LXR receptor modulators, their preparation, and their therapeutic use. FR2886293A1 (2006).

**AZ876**

Bostroem, J. *et al.* Preparation of non-anilinic isothiazol-3(2H)-one 1,1-dioxide derivatives for use as Liver X Receptor modulators. WO2006073363A1 (2006).
